# Supplementary material for: Arbuscular mycorrhizal fungi enhanced resistance to low-temperature weak-light stress in snapdragon (Antirrhinum majus L.) through physiological and transcriptomic responses
Source: Front Plant Sci. 2024 Apr 12;15:1330032. doi: 10.3389/fpls.2024.1330032 (PMC11045995; doi:10.3389/fpls.2024.1330032)
Supplement: Supplementary file 1 [file DataSheet_1.xlsx]

## Sheet: Table S1
Table S1 Statistics of sequencing results and quality
Sample	Raw Data		Valid Data		Valid Ratio(reads)	Q20%	Q30%	GC content%
	Reads	Base	Reads	Base
NTNL_1	50549154	7.58G	45922020	6.89G	90.85	99.99	99	45
NTNL_2	48716224	7.31G	45167772	6.78G	92.72	99.99	98.95	45
NTNL_3	41691172	6.25G	39286486	5.89G	94.23	99.99	98.98	45
NTNLI_1	53219912	7.98G	50992892	7.65G	95.82	99.99	99	45.5
NTNLI_2	52051520	7.81G	47798790	7.17G	91.83	99.99	98.95	45.5
NTNLI_3	55850194	8.38G	52075184	7.81G	93.24	99.99	98.95	45.5
LT_1	51984710	7.80G	42520658	6.38G	81.79	99.99	98.96	44.5
LT_2	50803984	7.62G	41984034	6.30G	82.64	99.99	98.95	44.5
LT_3	44123806	6.62G	36279690	5.44G	82.22	99.99	98.98	44.5
LTI_1	53027990	7.95G	45479346	6.82G	85.76	99.99	99.02	44.5
LTI_2	43675012	6.55G	39493172	5.92G	90.43	99.99	98.95	44.5
LTI_3	42898228	6.43G	41009230	6.15G	95.6	99.99	98.91	44.5
WL_1	47885090	7.18G	42298448	6.34G	88.33	99.99	98.96	45.5
WL_2	56346848	8.45G	44853378	6.73G	79.6	99.99	99.09	45.5
WL_3	47641622	7.15G	40073932	6.01G	84.12	99.99	99.03	45.5
WLI_1	38955154	5.84G	36863488	5.53G	94.63	99.99	98.97	46
WLI_2	46687198	7.00G	44230908	6.63G	94.74	99.99	98.96	46
WLI_3	44992078	6.75G	39196308	5.88G	87.12	99.99	98.91	46
LTWL_1	37053990	5.56G	34422396	5.16G	92.9	99.99	98.95	46.5
LTWL_2	38682524	5.80G	35162520	5.27G	90.9	99.99	98.98	46.5
LTWL_3	46171404	6.93G	42258726	6.34G	91.53	99.99	98.99	46.5
LTWLI_1	47946714	7.19G	39633466	5.95G	82.66	99.99	98.85	45
LTWLI_2	52094574	7.81G	42633544	6.40G	81.84	99.99	98.9	44.5
LTWLI_3	44580784	6.69G	39842560	5.98G	89.37	99.99	99.04	45
Note: Q20, Q30, Percentage of bases that are larger than 20 or 30

## Sheet: Table S2
Table S2 Chromosome number of Antirrhinum majus, GO and KEGG database annotation results statistics
Item	Number
Chromosome	8
Genes(G)	37232
Transcripts(T)	51724
Average T/G	1.4
GO Annoated	26424
KEGG Annoated	10723

## Sheet: Table S3
Table S3 Table of statistical data reads mapping
Sample	Valid reads	Mapped reads	Unique Mapped reads	Multi Mapped reads
NTNL_1	45922020	38844691(84.59%)	33626492(73.23%)	5218199(11.36%)
NTNL_2	45167772	38182688(84.54%)	33100477(73.28%)	5082211(11.25%)
NTNL_3	39286486	33253707(84.64%)	28766408(73.22%)	4487299(11.42%)
NTNLI_1	50992892	43487065(85.28%)	37256191(73.06%)	6230874(12.22%)
NTNLI_2	47798790	40617469(84.98%)	34812180(72.83%)	5805289(12.15%)
NTNLI_3	52075184	44268026(85.01%)	37906489(72.79%)	6361537(12.22%)
LT_1	42520658	36071307(84.83%)	31335987(73.70%)	4735320(11.14%)
LT_2	41984034	35581660(84.75%)	30888740(73.57%)	4692920(11.18%)
LT_3	36279690	30770926(84.82%)	26718074(73.64%)	4052852(11.17%)
LTI_1	45479346	38222510(84.04%)	33222580(73.05%)	4999930(10.99%)
LTI_2	39493172	33266837(84.23%)	28837666(73.02%)	4429171(11.22%)
LTI_3	41009230	34670648(84.54%)	30028859(73.22%)	4641789(11.32%)
WL_1	42298448	36137258(85.43%)	30292035(71.62%)	5845223(13.82%)
WL_2	44853378	38415015(85.65%)	32310494(72.04%)	6104521(13.61%)
WL_3	40073932	34257025(85.48%)	28791893(71.85%)	5465132(13.64%)
WLI_1	36863488	31612950(85.76%)	25755684(69.87%)	5857266(15.89%)
WLI_2	44230908	37971622(85.85%)	30946054(69.96%)	7025568(15.88%)
WLI_3	39196308	33467444(85.38%)	27320373(69.70%)	6147071(15.68%)
LTWL_1	34422396	30081844(87.39%)	23145171(67.24%)	6936673(20.15%)
LTWL_2	35162520	30743399(87.43%)	23608522(67.14%)	7134877(20.29%)
LTWL_3	42258726	36937241(87.41%)	28418698(67.25%)	8518543(20.16%)
LTWLI_1	39633466	33264584(83.93%)	28875257(72.86%)	4389327(11.07%)
LTWLI_2	42633544	35810892(84.00%)	31154905(73.08%)	4655987(10.92%)
LTWLI_3	39842560	33611925(84.36%)	29331490(73.62%)	4280435(10.74%)
Note: Valid reads: data after quality control; mapped reads: The number of Reads that can be mapped to the Antirrhinum majus genome; unique map: The number of reads that can only be uniquely matched to one location of the Antirrhinum majus genome; multi map can compare the number of reads in multiple locations of the Antirrhinum majus genome

## Sheet: Table S4
Table S4 Statistics of transcription factors
	gene_id	transcription factor_name	transcript_id	GO	KEGG	KO_ENTRY	EC	Description	trans_type	FPKM.LTI_1	FPKM.LTI_2	FPKM.LTI_3	FPKM.LT_1	FPKM.LT_2	FPKM.LT_3	fc	log2(fc)	pval	qval	regulation	significant
LT vs LTI	Am01g03200	C3H	Am01g03200.T01	NA	NA	NA	NA	zinc finger CCCH domain-containing protein 6 [Sesamum indicum]	NA	3.59914	2.89417	3.00515	0.51183	0.635813	0.268061	6.70935	2.74617	5.05848e-13	3.78688e-11	up	yes
	Am01g04700	C2H2	Am01g04700.T01	GO:0003700(DNA binding transcription factor activity);GO:0005634(nucleus);GO:0043565(sequence-specific DNA binding);GO:0044212(transcription regulatory region DNA binding);GO:0048235(pollen sperm cell differentiation)	NA	NA	NA	uncharacterized protein LOC105160026 [Sesamum indicum]	NA	2.237	1.40959	2.28058	0.995607	1.07753	0.759914	2.09215	1.06499	0.00460115	0.0361089	up	yes
	Am01g06170	MYB-related	Am01g06170.T01	GO:0003677(DNA binding);GO:0003700(DNA binding transcription factor activity);GO:0005634(nucleus);GO:0006351(transcription, DNA-templated);GO:0006355(regulation of transcription, DNA-templated)	NA	NA	NA	myb-like protein RL4, partial [Antirrhinum majus]	NA	45.0653	50.7304	42.0587	96.8093	95.8781	97.0556	0.475782	-1.07163	1.91016e-09	9.14645e-08	down	yes
	Am01g07390	AP2/ERF-ERF	Am01g07390.T01	GO:0003677(DNA binding);GO:0003700(DNA binding transcription factor activity);GO:0005515(protein binding);GO:0005634(nucleus);GO:0006351(transcription, DNA-templated);GO:0006355(regulation of transcription, DNA-templated);GO:0006970(response to osmotic stress);GO:0009409(response to cold);GO:0009414(response to water deprivation);GO:0009873(ethylene-activated signaling pathway);GO:0043565(sequenc…	NA	NA	NA	ethylene-responsive transcription factor RAP2-13 [Sesamum indicum]	NA	14.3682	13.9016	13.1102	46.7625	46.5175	42.9477	0.303756	-1.71901	9.65176e-22	1.86195e-19	down	yes
	Am01g07430	C2H2	Am01g07430.T01	GO:0003676(nucleic acid binding);GO:0003677(DNA binding);GO:0003700(DNA binding transcription factor activity);GO:0005515(protein binding);GO:0005634(nucleus);GO:0006351(transcription, DNA-templated);GO:0006355(regulation of transcription, DNA-templated);GO:0008270(zinc ion binding);GO:0008356(asymmetric cell division);GO:0010075(regulation of meristem growth);GO:0042803(protein homodimerization …	00052(Galactose metabolism);00600(Sphingolipid metabolism);00531(Glycosaminoglycan degradation);00604(Glycosphingolipid biosynthesis - ganglio series);00511(Other glycan degradation)	K12309	EC:3.2.1.23	protein indeterminate-domain 12 [Medicago truncatula]	NA	0.312266	0.297758	0.264428	1.02141	0.786253	1.13987	0.296672	-1.75306	0.000134721	0.00198597	down	yes
	Am01g11140	bZIP	Am01g11140.T01	NA	NA	NA	NA		NA	1.54513	1.80093	1.60909	0.730075	0.629212	0.922023	2.17207	1.11907	0.00330058	0.0276607	up	yes
	Am01g17260	bZIP	Am01g17260.T01	GO:0003677(DNA binding);GO:0003700(DNA binding transcription factor activity);GO:0005515(protein binding);GO:0005634(nucleus);GO:0006351(transcription, DNA-templated);GO:0006355(regulation of transcription, DNA-templated);GO:0006971(hypotonic response);GO:0009267(cellular response to starvation);GO:0043565(sequence-specific DNA binding);GO:0045735(nutrient reservoir activity);GO:0045893(positive …	NA	NA	NA	bZIP transcription factor 53-like [Sesamum indicum]	NA	0.177948	0.566454	0.553056	2.29864	1.87079	2.99294	0.181149	-2.46475	1.57405e-07	5.2898e-06	down	yes
	Am01g17470	MYB	Am01g17470.T01	GO:0000981(RNA polymerase II transcription factor activity, sequence-specific DNA binding);GO:0001135(transcription factor activity, RNA polymerase II transcription factor recruiting);GO:0003677(DNA binding);GO:0003700(DNA binding transcription factor activity);GO:0005634(nucleus);GO:0006351(transcription, DNA-templated);GO:0006355(regulation of transcription, DNA-templated);GO:0006357(regulation…	NA	NA	NA	Transcription factor, Myb superfamily [Handroanthus impetiginosus]	NA	0.0001	0.0001	0.0001	0.687134	1.13971	0.973924	0.000107113	-13.1886	5.13007e-16	5.47471e-14	down	yes
	Am01g17630	SBP	Am01g17630.T01	GO:0003677(DNA binding);GO:0003700(DNA binding transcription factor activity);GO:0005634(nucleus);GO:0006351(transcription, DNA-templated);GO:0006355(regulation of transcription, DNA-templated);GO:0016021(integral component of membrane);GO:0046872(metal ion binding)	NA	NA	NA	LOW QUALITY PROTEIN: squamosa promoter-binding-like protein 12 [Coffea arabica]	NA	20.9444	21.2785	19.9826	11.0988	9.70454	10.1786	2.0078	1.00562	9.68823e-06	0.000201634	up	yes
	Am01g19660	AP2/ERF-ERF	Am01g19660.T01	GO:0003677(DNA binding);GO:0003700(DNA binding transcription factor activity);GO:0005622(intracellular);GO:0005634(nucleus);GO:0006351(transcription, DNA-templated);GO:0006355(regulation of transcription, DNA-templated);GO:0006952(defense response);GO:0009867(jasmonic acid mediated signaling pathway);GO:0009873(ethylene-activated signaling pathway)	04016(MAPK signaling pathway - plant);04075(Plant hormone signal transduction)	K14516	NA	hypothetical protein CDL12_17260 [Handroanthus impetiginosus]	NA	0.40628	0.352674	0.382834	4.0969	5.95296	6.52363	0.0688925	-3.85951	2.31678e-22	4.69511e-20	down	yes
	Am01g22950	WRKY	Am01g22950.T01;Am01g22950.T03;Am01g22950.T02	GO:0003700(DNA binding transcription factor activity);GO:0005515(protein binding);GO:0005634(nucleus);GO:0006351(transcription, DNA-templated);GO:0006355(regulation of transcription, DNA-templated);GO:0009751(response to salicylic acid);GO:0031347(regulation of defense response);GO:0043565(sequence-specific DNA binding);GO:1900056(negative regulation of leaf senescence);GO:1900056(negative regula…	04626(Plant-pathogen interaction);04626(Plant-pathogen interaction)	K13459	NA	hypothetical protein CDL12_05914 [Handroanthus impetiginosus]	NA	16.3798	18.303	20.2574	8.25422	10.1395	9.06941	2.00051	1.00037	1.76594e-05	0.000343648	up	yes
	Am01g27990	bZIP	Am01g27990.T01	GO:0003677(DNA binding);GO:0003700(DNA binding transcription factor activity);GO:0005515(protein binding);GO:0005634(nucleus);GO:0006351(transcription, DNA-templated);GO:0006355(regulation of transcription, DNA-templated);GO:0009414(response to water deprivation);GO:0009651(response to salt stress);GO:0009737(response to abscisic acid);GO:0009738(abscisic acid-activated signaling pathway);GO:0009…	04075(Plant hormone signal transduction)	K14432	NA	protein ABSCISIC ACID-INSENSITIVE 5 [Sesamum indicum]	NA	1.27539	1.20357	1.59641	0.184784	0.348488	0.0001	7.64076	2.93372	8.23237e-06	0.000174042	up	yes
	Am01g31440	MYB	Am01g31440.T01;Am01g31440.T02	GO:0000981(RNA polymerase II transcription factor activity, sequence-specific DNA binding);GO:0001135(transcription factor activity, RNA polymerase II transcription factor recruiting);GO:0003677(DNA binding);GO:0003700(DNA binding transcription factor activity);GO:0005634(nucleus);GO:0006355(regulation of transcription, DNA-templated);GO:0006357(regulation of transcription by RNA polymerase II);G…	NA	NA	NA	transcription factor MYB124-like isoform X1 [Sesamum indicum]	NA	2.19378	2.36371	1.73167	0.427375	0.376056	0.16112	6.5203	2.70494	1.93885e-11	1.24278e-09	up	yes
	Am01g34970	C2H2	Am01g34970.T01	GO:0003676(nucleic acid binding);GO:0005634(nucleus);GO:0008150(biological_process);GO:0008270(zinc ion binding)	NA	NA	NA	A20/AN1-type zinc-finger protein [Fraxinus velutina]	NA	1.28142	0.803677	0.746879	0.622332	0.337979	0.238997	2.36134	1.23961	0.0131885	0.0805729	up	yes
	Am01g45570	MYB-related	Am01g45570.T01	GO:0003677(DNA binding);GO:0003700(DNA binding transcription factor activity);GO:0005634(nucleus);GO:0006355(regulation of transcription, DNA-templated)	NA	NA	NA	hypothetical protein CDL12_12120 [Handroanthus impetiginosus]	NA	13.4708	14.118	18.9243	39.207	42.009	42.8156	0.37501	-1.415	1.70402e-09	8.27792e-08	down	yes
	Am02g04130	C2C2-Dof	Am02g04130.T01	GO:0003677(DNA binding);GO:0003700(DNA binding transcription factor activity);GO:0005634(nucleus);GO:0006351(transcription, DNA-templated);GO:0009908(flower development);GO:0045892(negative regulation of transcription, DNA-templated);GO:0046872(metal ion binding);GO:1902455(negative regulation of stem cell population maintenance)	04712(Circadian rhythm - plant)	K16222	NA	dof zinc finger protein DOF1.5-like [Sesamum indicum]	NA	3.92317	4.61622	4.81412	10.9926	11.6099	11.8683	0.387386	-1.36816	6.77106e-08	2.43892e-06	down	yes
	Am02g04560	AP2/ERF-ERF	Am02g04560.T01	GO:0003677(DNA binding);GO:0003700(DNA binding transcription factor activity);GO:0005622(intracellular);GO:0005634(nucleus);GO:0006351(transcription, DNA-templated);GO:0006355(regulation of transcription, DNA-templated);GO:0009873(ethylene-activated signaling pathway);GO:0010200(response to chitin)	04016(MAPK signaling pathway - plant);04075(Plant hormone signal transduction)	K14516	NA	ethylene-responsive transcription factor ERF091 [Sesamum indicum]	NA	0.0001	0.0001	0.127479	2.17657	1.87622	1.22572	0.0241884	-5.36954	5.80957e-14	4.81642e-12	down	yes
	Am02g06090	MYB	Am02g06090.T01	GO:0000981(RNA polymerase II transcription factor activity, sequence-specific DNA binding);GO:0001135(transcription factor activity, RNA polymerase II transcription factor recruiting);GO:0003677(DNA binding);GO:0003700(DNA binding transcription factor activity);GO:0005634(nucleus);GO:0006351(transcription, DNA-templated);GO:0006355(regulation of transcription, DNA-templated);GO:0006357(regulation…	NA	NA	NA	protein ODORANT1 [Sesamum indicum]	NA	1.00822	1.21404	1.08804	3.98578	3.02339	3.85636	0.304661	-1.71472	5.22023e-08	1.95252e-06	down	yes
	Am02g07190	MYB-related	Am02g07190.T01	GO:0000981(RNA polymerase II transcription factor activity, sequence-specific DNA binding);GO:0001135(transcription factor activity, RNA polymerase II transcription factor recruiting);GO:0003677(DNA binding);GO:0003700(DNA binding transcription factor activity);GO:0005515(protein binding);GO:0005634(nucleus);GO:0006351(transcription, DNA-templated);GO:0006355(regulation of transcription, DNA-temp…	NA	NA	NA	PREDICTED: transcription factor CPC [Eucalyptus grandis]	NA	2.74981	2.69778	4.15612	1.17745	1.45429	1.49805	2.32547	1.21752	0.00523833	0.0399455	up	yes
	Am02g24760	B3	Am02g24760.T01	GO:0003674(molecular_function);GO:0005886(plasma membrane);GO:0008150(biological_process);GO:0009507(chloroplast);GO:0016021(integral component of membrane)	NA	NA	NA	uncharacterized protein LOC105170136 [Sesamum indicum]	NA	0.363821	0.329776	0.127797	0.030016	0.068447	0.070706	4.85546	2.27961	0.000322905	0.00420897	up	yes
	Am02g30860	bZIP	Am02g30860.T01	GO:0003677(DNA binding);GO:0003700(DNA binding transcription factor activity);GO:0005515(protein binding);GO:0005634(nucleus);GO:0006351(transcription, DNA-templated);GO:0006355(regulation of transcription, DNA-templated);GO:0042803(protein homodimerization activity);GO:0046982(protein heterodimerization activity);GO:0071333(cellular response to glucose stimulus)	NA	NA	NA	PREDICTED: basic leucine zipper 9 [Erythranthe guttata]	NA	0.400394	0.667347	0.0001	0.71447	1.37063	0.980492	0.348331	-1.52147	0.0287015	0.140346	down	yes
	Am02g36310	MADS-MIKC	Am02g36310.T01;Am02g36310.T02	GO:0000977(RNA polymerase II regulatory region sequence-specific DNA binding);GO:0003677(DNA binding);GO:0003700(DNA binding transcription factor activity);GO:0004601(peroxidase activity);GO:0005515(protein binding);GO:0005634(nucleus);GO:0005737(cytoplasm);GO:0006351(transcription, DNA-templated);GO:0009793(embryo development ending in seed dormancy);GO:0009910(negative regulation of flower deve…	NA	NA	NA	agamous-like MADS-box protein AGL15 [Sesamum indicum]	NA	4.59529	4.2962	4.2351	9.9	9.49338	10.411	0.440425	-1.18303	2.10227e-09	1.00185e-07	down	yes
	Am02g37190	MADS-MIKC	Am02g37190.T01	GO:0005515(protein binding)	NA	NA	NA	MADS-box transcription factor 6 [Sesamum indicum]	NA	0.862605	1.0174	0.565061	0.490231	0.0001	0.145639	3.84463	1.94285	0.0154632	0.0905495	up	yes
	Am02g41090	C2H2	Am02g41090.T01	GO:0001709(cell fate determination);GO:0003676(nucleic acid binding);GO:0003700(DNA binding transcription factor activity);GO:0005634(nucleus);GO:0006351(transcription, DNA-templated);GO:0006355(regulation of transcription, DNA-templated);GO:0008270(zinc ion binding);GO:0009860(pollen tube growth);GO:0010468(regulation of gene expression);GO:0010500(transmitting tissue development);GO:0046872(met…	NA	NA	NA	C2H2-type Zn-finger protein [Handroanthus impetiginosus]	NA	1.90718	1.76614	1.77951	0.0001	0.0001	0.0001	18176.1	14.1498	6.45554e-24	1.50602e-21	up	yes
	Am02g42710	AP2/ERF-ERF	Am02g42710.T01	GO:0003677(DNA binding);GO:0003700(DNA binding transcription factor activity);GO:0005634(nucleus);GO:0006351(transcription, DNA-templated);GO:0006355(regulation of transcription, DNA-templated);GO:0009873(ethylene-activated signaling pathway);GO:0044212(transcription regulatory region DNA binding)	NA	NA	NA	hypothetical protein CDL12_24292 [Handroanthus impetiginosus]	NA	1.75005	2.03848	1.64806	0.530904	0.887163	0.586631	2.71193	1.43932	0.000692588	0.00793116	up	yes
	Am02g43350	WRKY	Am02g43350.T01	GO:0009737(response to abscisic acid)	04626(Plant-pathogen interaction)	K16225	NA	probable WRKY transcription factor 41 [Sesamum indicum]	NA	11.0175	8.17739	10.393	4.87375	5.35402	3.9617	2.0852	1.06019	0.000105964	0.00161669	up	yes
	Am02g47520	bZIP	Am02g47520.T01	GO:0001228(transcriptional activator activity, RNA polymerase II transcription regulatory region sequence-specific DNA binding);GO:0002237(response to molecule of bacterial origin);GO:0003677(DNA binding);GO:0003700(DNA binding transcription factor activity);GO:0005515(protein binding);GO:0005634(nucleus);GO:0006351(transcription, DNA-templated);GO:0006355(regulation of transcription, DNA-templat…	04075(Plant hormone signal transduction)	K14431	NA	Transcriptional activator of the JUN family [Handroanthus impetiginosus]	NA	0.384398	0.44014	0.086043	0.566741	0.551699	0.901421	0.450814	-1.1494	0.0237584	0.122568	down	yes
	Am02g55250	MYB	Am02g55250.T01;Am02g55250.T02	GO:0000981(RNA polymerase II transcription factor activity, sequence-specific DNA binding);GO:0001135(transcription factor activity, RNA polymerase II transcription factor recruiting);GO:0003677(DNA binding);GO:0003700(DNA binding transcription factor activity);GO:0005515(protein binding);GO:0005634(nucleus);GO:0006351(transcription, DNA-templated);GO:0006355(regulation of transcription, DNA-temp…	NA	NA	NA	Transcription factor, Myb superfamily [Handroanthus impetiginosus];Transcription factor like [Actinidia chinensis var. chinensis]	NA	5.71409	3.7448	3.73732	10.7204	8.54452	10.4667	0.443845	-1.17187	1.14314e-05	0.000233314	down	yes
	Am03g01760	C2H2	Am03g01760.T01	GO:0003676(nucleic acid binding);GO:0003700(DNA binding transcription factor activity);GO:0005634(nucleus);GO:0006355(regulation of transcription, DNA-templated)	NA	NA	NA	uncharacterized protein LOC105174809 [Sesamum indicum]	NA	3.14478	4.57728	4.30543	1.90778	1.62816	1.9117	2.20783	1.14263	0.000312556	0.00409054	up	yes
	Am03g04130	WRKY	Am03g04130.T01	NA	NA	NA	NA		NA	0.087234	0.0001	0.0001	1.07433	1.0904	0.934741	0.0282094	-5.14768	7.90488e-14	6.52657e-12	down	yes
	Am03g10110	GARP-G2-like	Am03g10110.T01	GO:0010638(positive regulation of organelle organization);GO:0045893(positive regulation of transcription, DNA-templated)	04075(Plant hormone signal transduction)	K14491	NA	hypothetical protein CDL12_23682 [Handroanthus impetiginosus]	NA	4.99704	3.75118	5.23825	1.55394	1.90333	2.216	2.46533	1.30178	2.41305e-05	0.000454583	up	yes
	Am03g11430	bZIP	Am03g11430.T01	GO:0000977(RNA polymerase II regulatory region sequence-specific DNA binding);GO:0003677(DNA binding);GO:0003700(DNA binding transcription factor activity);GO:0005634(nucleus);GO:0009555(pollen development);GO:0045893(positive regulation of transcription, DNA-templated)	04141(Protein processing in endoplasmic reticulum)	K04374	NA	basic leucine zipper 61 [Sesamum indicum]	NA	6.04056	4.34531	4.77487	2.90402	2.35161	2.12281	2.05473	1.03895	0.00100581	0.0107567	up	yes
	Am03g11660	FAR1	Am03g11660.T01;Am03g11660.T02	GO:0003700(DNA binding transcription factor activity);GO:0005515(protein binding);GO:0005634(nucleus);GO:0008270(zinc ion binding);GO:0009585(red, far-red light phototransduction);GO:0009639(response to red or far red light);GO:0010017(red or far-red light signaling pathway);GO:0010018(far-red light signaling pathway);GO:0010218(response to far red light);GO:0042753(positive regulation of circadi…	NA	NA	NA	protein FAR-RED IMPAIRED RESPONSE 1-like [Coffea eugenioides];protein FAR-RED IMPAIRED RESPONSE 1-like [Coffea arabica]	NA	0.806276	0.43088	0.264572	1.61211	1.33665	1.10861	0.370123	-1.43392	0.000721018	0.0081827	down	yes
	Am03g12990	HB-HD-ZIP	Am03g12990.T01	GO:0003677(DNA binding);GO:0003700(DNA binding transcription factor activity);GO:0005515(protein binding);GO:0005634(nucleus);GO:0006351(transcription, DNA-templated);GO:0006355(regulation of transcription, DNA-templated);GO:0008289(lipid binding);GO:0043565(sequence-specific DNA binding)	NA	NA	NA	homeobox-leucine zipper protein HDG5 isoform X1 [Sesamum indicum]	NA	0.457101	0.765811	0.941151	0.243506	0.411919	0.347801	2.1571	1.1091	0.0124073	0.0771389	up	yes
	Am03g13440	NAC	Am03g13440.T01	GO:0003700(DNA binding transcription factor activity);GO:0005634(nucleus);GO:0006351(transcription, DNA-templated);GO:0007275(multicellular organism development);GO:0009809(lignin biosynthetic process);GO:0009834(plant-type secondary cell wall biogenesis);GO:0010047(fruit dehiscence);GO:0043565(sequence-specific DNA binding);GO:0045893(positive regulation of transcription, DNA-templated)	03013(RNA transport);03015(mRNA surveillance pathway);03018(RNA degradation)	K13126	NA	NAC domain-containing protein 12 [Sesamum indicum]	NA	0.733312	0.877555	1.65032	0.620518	0.303504	0.0001	3.52896	1.81924	0.0183832	0.102082	up	yes
	Am03g18940	MYB	Am03g18940.T01	GO:0000981(RNA polymerase II transcription factor activity, sequence-specific DNA binding);GO:0001135(transcription factor activity, RNA polymerase II transcription factor recruiting);GO:0003677(DNA binding);GO:0003700(DNA binding transcription factor activity);GO:0005634(nucleus);GO:0006351(transcription, DNA-templated);GO:0006355(regulation of transcription, DNA-templated);GO:0006357(regulation…	NA	NA	NA	myb-related protein 330-like [Dorcoceras hygrometricum]	NA	16.3974	15.9688	18.3831	34.3672	36.1125	35.2893	0.479812	-1.05946	6.35907e-09	2.79052e-07	down	yes
	Am03g24230	HB-HD-ZIP	Am03g24230.T01	GO:0003700(DNA binding transcription factor activity);GO:0005634(nucleus);GO:0006351(transcription, DNA-templated);GO:0006355(regulation of transcription, DNA-templated);GO:0009651(response to salt stress);GO:0043565(sequence-specific DNA binding)	NA	NA	NA	homeobox-leucine zipper protein HOX3 [Coffea eugenioides]	NA	1.21036	0.662106	0.618353	1.56334	2.19238	1.29493	0.493168	-1.01985	0.0164524	0.0947264	down	yes
	Am03g25610	GRAS	Am03g25610.T01	GO:0003700(DNA binding transcription factor activity);GO:0005634(nucleus);GO:0006355(regulation of transcription, DNA-templated);GO:0043565(sequence-specific DNA binding);GO:2000032(regulation of secondary shoot formation)	04075(Plant hormone signal transduction)	K14494	NA	hypothetical protein CDL12_04975 [Handroanthus impetiginosus]	NA	0.503568	0.268025	0.346411	0.871123	0.956732	1.02492	0.3919	-1.35144	0.000615896	0.00717997	down	yes
	Am03g25880	NAC	Am03g25880.T01	GO:0003677(DNA binding);GO:0003700(DNA binding transcription factor activity);GO:0005634(nucleus);GO:0005737(cytoplasm);GO:0006351(transcription, DNA-templated);GO:0006355(regulation of transcription, DNA-templated);GO:0007275(multicellular organism development)	NA	NA	NA	NAC domain-containing protein 92 [Sesamum indicum]	NA	1.04606	1.22189	0.569543	2.91099	3.30632	2.76475	0.315907	-1.66243	1.40006e-06	3.70905e-05	down	yes
	Am03g26450	AP2/ERF-RAV	Am03g26450.T01	GO:0003677(DNA binding);GO:0003700(DNA binding transcription factor activity);GO:0005634(nucleus);GO:0006351(transcription, DNA-templated);GO:0006355(regulation of transcription, DNA-templated);GO:0009873(ethylene-activated signaling pathway)	NA	NA	NA	AP2/ERF and B3 domain-containing transcription factor At1g50680 [Sesamum indicum]	NA	9.46427	9.41584	9.89671	26.4199	28.4731	26.3102	0.35438	-1.49663	2.10809e-14	1.84693e-12	down	yes
	Am03g31230	WRKY	Am03g31230.T01	GO:0003700(DNA binding transcription factor activity);GO:0005634(nucleus);GO:0006351(transcription, DNA-templated);GO:0006355(regulation of transcription, DNA-templated);GO:0006952(defense response);GO:0043565(sequence-specific DNA binding)	00970(Aminoacyl-tRNA biosynthesis)	K01892	EC:6.1.1.21	probable WRKY transcription factor 61 [Olea europaea var. sylvestris]	NA	0.058533	0.0001	0.131966	2.86743	2.11447	2.17008	0.0266498	-5.22973	1.25564e-22	2.62417e-20	down	yes
	Am03g31630	bHLH	Am03g31630.T01;Am03g31630.T02	GO:0005634(nucleus);GO:0005737(cytoplasm);GO:0006351(transcription, DNA-templated);GO:0006355(regulation of transcription, DNA-templated);GO:0009416(response to light stimulus);GO:0040008(regulation of growth);GO:0046983(protein dimerization activity);GO:0046983(protein dimerization activity)	NA	NA	NA	transcription factor PRE6-like [Sesamum indicum];PREDICTED: transcription factor PRE6 [Ipomoea nil]	NA	1.63278	2.12477	1.83951	0.475782	0.240767	1.29485	2.78267	1.47647	0.00810041	0.0561183	up	yes
	Am03g31650	HB-HD-ZIP	Am03g31650.T01;Am03g31650.T02	GO:0003677(DNA binding);GO:0003700(DNA binding transcription factor activity);GO:0005634(nucleus);GO:0006351(transcription, DNA-templated);GO:0006355(regulation of transcription, DNA-templated);GO:0009744(response to sucrose);GO:0009965(leaf morphogenesis);GO:0043565(sequence-specific DNA binding);GO:0048826(cotyledon morphogenesis);GO:0080022(primary root development);GO:0009739(response to gibb…	NA	NA	NA	homeobox-leucine zipper protein ATHB-13 [Sesamum indicum]	NA	2.36125	2.2355	2.37154	0.996569	1.22497	0.733624	2.358	1.23756	0.00024457	0.00334591	up	yes
	Am03g32160	NAC	Am03g32160.T01	GO:0003677(DNA binding);GO:0003700(DNA binding transcription factor activity);GO:0005634(nucleus);GO:0006351(transcription, DNA-templated);GO:0006355(regulation of transcription, DNA-templated);GO:0007275(multicellular organism development);GO:0009793(embryo development ending in seed dormancy);GO:0009825(multidimensional cell growth);GO:0009835(fruit ripening);GO:0009908(flower development);GO:0…	NA	NA	NA	LOW QUALITY PROTEIN: NAC transcription factor 29 [Sesamum indicum]	NA	2.68368	2.37998	3.34084	10.9271	11.0809	10.5713	0.25797	-1.95472	4.39004e-15	4.17429e-13	down	yes
	Am03g34240	AP2/ERF-ERF	Am03g34240.T01	GO:0003677(DNA binding);GO:0003700(DNA binding transcription factor activity);GO:0005634(nucleus);GO:0006351(transcription, DNA-templated);GO:0006355(regulation of transcription, DNA-templated);GO:0009873(ethylene-activated signaling pathway)	04626(Plant-pathogen interaction)	K13434	NA	ethylene-responsive transcription factor ERF069 [Sesamum indicum]	NA	5.25707	7.41889	8.11619	16.5064	19.2088	15.0379	0.409673	-1.28746	1.24383e-07	4.24406e-06	down	yes
	Am03g36190	NF-YA	Am03g36190.T01;Am03g36190.T02;Am03g36190.T05;Am03g36190.T03;Am03g36190.T04	GO:0003677(DNA binding);GO:0003700(DNA binding transcription factor activity);GO:0005515(protein binding);GO:0005634(nucleus);GO:0006351(transcription, DNA-templated);GO:0006355(regulation of transcription, DNA-templated);GO:0016602(CCAAT-binding factor complex);GO:0045892(negative regulation of transcription, DNA-templated);GO:0009793(embryo development ending in seed dormancy);GO:0010262(somati…	NA	NA	NA	YA5 [Antirrhinum majus]	NA	0.332199	0.47541	0.266822	4.91828	5.02103	5.0163	0.0718413	-3.79904	1.11667e-31	3.93048e-29	down	yes
	Am03g36790	bHLH	Am03g36790.T01	GO:0001046(core promoter sequence-specific DNA binding);GO:0001228(transcriptional activator activity, RNA polymerase II transcription regulatory region sequence-specific DNA binding);GO:0005634(nucleus);GO:0006366(transcription by RNA polymerase II)	NA	NA	NA	transcription factor bHLH130-like [Sesamum indicum]	NA	4.5935	4.2982	6.2525	10.5213	9.20483	11.577	0.483792	-1.04754	5.52386e-05	0.000928184	down	yes
	Am03g37790	AP2/ERF-ERF	Am03g37790.T01	GO:0000302(response to reactive oxygen species);GO:0003677(DNA binding);GO:0003700(DNA binding transcription factor activity);GO:0005634(nucleus);GO:0006351(transcription, DNA-templated);GO:0006355(regulation of transcription, DNA-templated);GO:0009723(response to ethylene);GO:0009873(ethylene-activated signaling pathway);GO:0035865(cellular response to potassium ion);GO:0043565(sequence-specific…	NA	NA	NA	ethylene-responsive transcription factor RAP2-11-like [Sesamum indicum]	NA	2.24233	2.71221	2.11114	6.58503	6.1364	5.89293	0.379583	-1.39751	3.67314e-07	1.1355e-05	down	yes
	Am03g39660	C2H2	Am03g39660.T01	GO:0003700(DNA binding transcription factor activity);GO:0005634(nucleus);GO:0010200(response to chitin);GO:0043565(sequence-specific DNA binding);GO:0044212(transcription regulatory region DNA binding)	NA	NA	NA	hypothetical protein MIMGU_mgv1a024189mg, partial [Erythranthe guttata]	NA	2.09949	0.354614	1.10358	5.5403	4.75955	4.75195	0.236363	-2.08093	1.02945e-05	0.00021227	down	yes
	Am03g41230	MYB	Am03g41230.T01	GO:0000981(RNA polymerase II transcription factor activity, sequence-specific DNA binding);GO:0001135(transcription factor activity, RNA polymerase II transcription factor recruiting);GO:0003677(DNA binding);GO:0003700(DNA binding transcription factor activity);GO:0005634(nucleus);GO:0006351(transcription, DNA-templated);GO:0006355(regulation of transcription, DNA-templated);GO:0006357(regulation…	NA	NA	NA	transcription factor MYB86 [Sesamum indicum]	NA	4.58014	4.98743	4.24279	1.55691	1.6082	1.65139	2.8673	1.51969	9.87735e-07	2.71465e-05	up	yes
	Am04g11920	FAR1	Am04g11920.T01	GO:0006855(drug transmembrane transport)	NA	NA	NA	putative membrane protein, predicted efflux pump [Handroanthus impetiginosus]	NA	0.338435	0.346543	0.175477	0.022344	0.179414	0.086686	2.98309	1.57681	0.0139034	0.0834699	up	yes
	Am04g15180	LOB	Am04g15180.T01;Am04g15180.T02	GO:0005515(protein binding);GO:0005634(nucleus);GO:0008150(biological_process);GO:0008150(biological_process)	NA	NA	NA	hypothetical protein LR48_Vigan04g107900 [Vigna angularis];LOB domain-containing protein 15-like [Olea europaea var. sylvestris]	NA	0.13058	0.0001	0.065312	1.11845	1.66653	0.536641	0.059005	-4.08302	4.14753e-09	1.89118e-07	down	yes
	Am04g15240	WRKY	Am04g15240.T01	GO:0000978(RNA polymerase II proximal promoter sequence-specific DNA binding);GO:0003700(DNA binding transcription factor activity);GO:0005634(nucleus);GO:0006351(transcription, DNA-templated);GO:0006355(regulation of transcription, DNA-templated);GO:0044212(transcription regulatory region DNA binding);GO:0045893(positive regulation of transcription, DNA-templated);GO:1901141(regulation of lignin…	04016(MAPK signaling pathway - plant);04626(Plant-pathogen interaction)	K13424	NA	hypothetical protein CDL12_00373 [Handroanthus impetiginosus]	NA	3.22519	3.6469	3.72316	1.11725	1.29704	1.83428	2.49384	1.31837	0.000251389	0.00340786	up	yes
	Am04g25760	C2C2-CO-like	Am04g25760.T01	GO:0003700(DNA binding transcription factor activity);GO:0005515(protein binding);GO:0005634(nucleus);GO:0006355(regulation of transcription, DNA-templated);GO:0008270(zinc ion binding);GO:0016020(membrane)	04712(Circadian rhythm - plant)	K12135	NA	GATA-4/5/6 transcription factor [Handroanthus impetiginosus]	NA	13.5469	10.9768	12.5331	5.67285	4.81353	5.00113	2.39269	1.25863	2.44022e-07	7.77115e-06	up	yes
	Am04g26440	WRKY	Am04g26440.T01	NA	04016(MAPK signaling pathway - plant);04626(Plant-pathogen interaction)	K13426	NA	hypothetical protein CDL12_19530 [Handroanthus impetiginosus]	NA	0.840545	0.535447	1.23908	4.32671	3.65439	3.84716	0.221087	-2.17732	1.46328e-09	7.26675e-08	down	yes
	Am04g28080	GRAS	Am04g28080.T01	GO:0003700(DNA binding transcription factor activity);GO:0005634(nucleus);GO:0006355(regulation of transcription, DNA-templated);GO:0043565(sequence-specific DNA binding)	04075(Plant hormone signal transduction)	K14494	NA	scarecrow-like protein 28 [Sesamum indicum]	NA	0.515266	0.484798	0.504854	0.212958	0.396826	0.109544	2.09212	1.06496	0.0418882	0.181317	up	yes
	Am04g31860	C2C2-GATA	Am04g31860.T01	GO:0000977(RNA polymerase II regulatory region sequence-specific DNA binding);GO:0001085(RNA polymerase II transcription factor binding);GO:0001228(transcriptional activator activity, RNA polymerase II transcription regulatory region sequence-specific DNA binding);GO:0003682(chromatin binding);GO:0005634(nucleus);GO:0005667(transcription factor complex);GO:0030154(cell differentiation)	NA	NA	NA	GATA transcription factor 9-like [Olea europaea var. sylvestris]	NA	0.712473	0.32306	0.738373	0.249494	0.18029	0.249789	2.61032	1.38423	0.0169247	0.0967684	up	yes
	Am04g34480	MADS-M-type	Am04g34480.T01	GO:0000976(transcription regulatory region sequence-specific DNA binding);GO:0000977(RNA polymerase II regulatory region sequence-specific DNA binding);GO:0000987(proximal promoter sequence-specific DNA binding);GO:0003677(DNA binding);GO:0003700(DNA binding transcription factor activity);GO:0005515(protein binding);GO:0005634(nucleus);GO:0006351(transcription, DNA-templated);GO:0043078(polar nuc…	NA	NA	NA	agamous-like MADS-box protein AGL80 [Sesamum indicum]	NA	3.34873	2.97599	2.71046	1.50632	0.861792	1.28636	2.47237	1.30589	0.00301317	0.0257576	up	yes
	Am04g37200	bHLH	Am04g37200.T01	GO:0003677(DNA binding);GO:0003700(DNA binding transcription factor activity);GO:0005515(protein binding);GO:0005634(nucleus);GO:0006351(transcription, DNA-templated);GO:0010052(guard cell differentiation);GO:0010377(guard cell fate commitment);GO:0010444(guard mother cell differentiation);GO:0045597(positive regulation of cell differentiation);GO:0045893(positive regulation of transcription, DNA…	04016(MAPK signaling pathway - plant)	K20558	NA	transcription factor FAMA [Dorcoceras hygrometricum]	NA	4.61329	6.00924	6.09888	13.0615	11.3295	11.0811	0.471398	-1.08498	1.78855e-06	4.60638e-05	down	yes
	Am05g02290	MYB-related	Am05g02290.T01	GO:0003677(DNA binding);GO:0003700(DNA binding transcription factor activity);GO:0005634(nucleus);GO:0006351(transcription, DNA-templated);GO:0006355(regulation of transcription, DNA-templated)	NA	NA	NA	protein RADIALIS-like 3 [Sesamum indicum]	NA	5.70027	6.70526	6.87034	19.9503	18.3223	22.927	0.314967	-1.66673	3.80388e-12	2.60469e-10	down	yes
	Am05g07600	GRAS	Am05g07600.T01	GO:0003700(DNA binding transcription factor activity);GO:0005634(nucleus);GO:0006355(regulation of transcription, DNA-templated);GO:0043565(sequence-specific DNA binding)	04075(Plant hormone signal transduction)	K14494	NA	scarecrow-like protein 21 [Sesamum indicum]	NA	1.7421	1.77692	1.42708	3.88055	3.44566	3.14514	0.472346	-1.08208	6.88863e-05	0.00111999	down	yes
	Am05g26050	C2H2	Am05g26050.T01	GO:0003700(DNA binding transcription factor activity);GO:0005634(nucleus);GO:0043565(sequence-specific DNA binding);GO:0044212(transcription regulatory region DNA binding)	NA	NA	NA	hypothetical protein CDL12_23166 [Handroanthus impetiginosus]	NA	4.82201	4.75957	7.17201	2.80729	1.67047	3.88774	2.0027	1.00195	0.0107379	0.0693832	up	yes
	Am05g28730	NAC	Am05g28730.T01	GO:0003677(DNA binding);GO:0003700(DNA binding transcription factor activity);GO:0005634(nucleus);GO:0006351(transcription, DNA-templated);GO:0006355(regulation of transcription, DNA-templated);GO:0007275(multicellular organism development)	NA	NA	NA	hypothetical protein CDL12_11887 [Handroanthus impetiginosus]	NA	3.5974	3.36453	4.94124	13.0342	11.9749	11.5583	0.325514	-1.61921	4.17362e-11	2.55291e-09	down	yes
	Am05g30280	TCP	Am05g30280.T01	GO:0003700(DNA binding transcription factor activity);GO:0005634(nucleus);GO:0009799(specification of symmetry);GO:0009908(flower development);GO:0048262(determination of dorsal/ventral asymmetry)	NA	NA	NA	TCP protein, partial [Antirrhinum majus]	NA	2.70635	4.39641	3.95297	8.37771	7.33141	7.29925	0.480509	-1.05736	0.000114316	0.00172705	down	yes
	Am05g36430	MYB	Am05g36430.T01	GO:0000981(RNA polymerase II transcription factor activity, sequence-specific DNA binding);GO:0001135(transcription factor activity, RNA polymerase II transcription factor recruiting);GO:0003677(DNA binding);GO:0003700(DNA binding transcription factor activity);GO:0005634(nucleus);GO:0006351(transcription, DNA-templated);GO:0006355(regulation of transcription, DNA-templated);GO:0006357(regulation…	NA	NA	NA	transcription factor MYB86 [Sesamum indicum]	NA	0.356682	0.93908	1.52752	0.199825	0.315866	0.285071	3.52574	1.81793	0.0022301	0.0202089	up	yes
	Am05g41270	MADS-M-type	Am05g41270.T01	NA	NA	NA	NA		NA	7.33098	5.02362	2.7723	1.19669	2.3385	3.27792	2.22026	1.15073	0.03025	0.145611	up	yes
	Am05g44710	MYB-related	Am05g44710.T01	GO:0009908(flower development);GO:0048262(determination of dorsal/ventral asymmetry)	NA	NA	NA	protein RADIALIS-like 1 [Carica papaya]	NA	15.3821	13.357	15.5669	2.11432	3.33041	2.60442	5.50442	2.46059	5.92265e-12	3.98745e-10	up	yes
	Am06g09600	WRKY	Am06g09600.T01;Am06g09600.T02	GO:0009737(response to abscisic acid);GO:0009737(response to abscisic acid)	04626(Plant-pathogen interaction);04626(Plant-pathogen interaction)	K16225	NA	probable WRKY transcription factor 41 [Sesamum indicum];hypothetical protein CDL12_00717 [Handroanthus impetiginosus]	NA	24.3964	23.6848	25.9103	10.5593	11.1816	11.5951	2.21956	1.15028	1.61096e-08	6.55592e-07	up	yes
	Am06g13630	WRKY	Am06g13630.T01	GO:0000122(negative regulation of transcription by RNA polymerase II);GO:0000978(RNA polymerase II proximal promoter sequence-specific DNA binding);GO:0003700(DNA binding transcription factor activity);GO:0005634(nucleus);GO:0006351(transcription, DNA-templated);GO:0006355(regulation of transcription, DNA-templated);GO:0010055(atrichoblast differentiation);GO:0032107(regulation of response to nut…	04626(Plant-pathogen interaction)	K18835	NA	probable WRKY transcription factor 75 [Coffea arabica]	NA	27.2939	26.7458	23.7667	63.5599	67.2983	60.7492	0.406073	-1.30019	9.58449e-13	6.89224e-11	down	yes
	Am06g16510	HB-other	Am06g16510.T02;Am06g16510.T03;Am06g16510.T01	GO:0003700(DNA binding transcription factor activity);GO:0005515(protein binding);GO:0005634(nucleus);GO:0006355(regulation of transcription, DNA-templated);GO:0009723(response to ethylene);GO:0009736(cytokinin-activated signaling pathway);GO:0010094(specification of carpel identity);GO:0043565(sequence-specific DNA binding);GO:0043565(sequence-specific DNA binding)	NA	NA	NA	homeobox protein knotted-1-like 6 isoform X1 [Sesamum indicum];Transcription factor MEIS1 [Handroanthus impetiginosus]	NA	0.520622	0.616295	0.51805	0.152382	0.159281	0.123238	3.80539	1.92804	0.000114087	0.00172489	up	yes
	Am06g28820	AP2/ERF-ERF	Am06g28820.T01	NA	NA	NA	NA	uncharacterized protein LOC111377274 [Olea europaea var. sylvestris]	NA	0.250248	0.196836	0.181549	0.464972	0.650292	0.694993	0.347262	-1.5259	0.000998269	0.0107046	down	yes
	Am06g29100	NAC	Am06g29100.T01	GO:0003700(DNA binding transcription factor activity);GO:0005634(nucleus);GO:0007275(multicellular organism development);GO:0009965(leaf morphogenesis);GO:0010200(response to chitin);GO:0045792(negative regulation of cell size);GO:0048281(inflorescence morphogenesis)	NA	NA	NA	NAC domain-containing protein 96-like protein [Cinnamomum micranthum f. kanehirae]	NA	0.56053	2.13302	0.874027	3.99468	3.15482	5.42821	0.283643	-1.81785	0.000106207	0.00161794	down	yes
	Am06g31140	OFP	Am06g31140.T01	GO:0005634(nucleus);GO:0005886(plasma membrane);GO:0006351(transcription, DNA-templated);GO:0045892(negative regulation of transcription, DNA-templated)	NA	NA	NA	transcription repressor OFP7-like [Sesamum indicum]	NA	2.39912	1.50365	1.61674	0.393166	1.00136	0.346971	3.1694	1.66421	0.000893506	0.00974262	up	yes
	Am06g34430	MYB	Am06g34430.T01	GO:0000902(cell morphogenesis);GO:0000981(RNA polymerase II transcription factor activity, sequence-specific DNA binding);GO:0001135(transcription factor activity, RNA polymerase II transcription factor recruiting);GO:0003677(DNA binding);GO:0003700(DNA binding transcription factor activity);GO:0005634(nucleus);GO:0006351(transcription, DNA-templated);GO:0006355(regulation of transcription, DNA-t…	NA	NA	NA	MYB transcription factor MYBML3 [Antirrhinum majus]	NA	0.963928	1.14091	1.47276	0.613332	0.358783	0.556784	2.33998	1.2265	0.0128667	0.0789913	up	yes
	Am06g34440	NAC	Am06g34440.T01	GO:0003677(DNA binding);GO:0003700(DNA binding transcription factor activity);GO:0005634(nucleus);GO:0006351(transcription, DNA-templated);GO:0006355(regulation of transcription, DNA-templated);GO:0007275(multicellular organism development)	NA	NA	NA	hypothetical protein CDL12_16569 [Handroanthus impetiginosus]	NA	0.613438	0.636515	0.491441	2.64852	3.33865	2.80005	0.198173	-2.33517	1.14209e-11	7.48813e-10	down	yes
	Am06g39680	NAC	Am06g39680.T02;Am06g39680.T01;Am06g39680.T03	GO:0003677(DNA binding);GO:0003700(DNA binding transcription factor activity);GO:0005634(nucleus);GO:0006351(transcription, DNA-templated);GO:0006355(regulation of transcription, DNA-templated);GO:0007275(multicellular organism development);GO:0010014(meristem initiation);GO:0010199(organ boundary specification between lateral organs and the meristem);GO:0005515(protein binding);GO:0009651(respon…	NA	NA	NA	hypothetical protein CDL12_25788 [Handroanthus impetiginosus]	NA	6.92229	7.14093	7.64417	16.1688	18.0193	17.6651	0.418631	-1.25625	4.96262e-10	2.6635e-08	down	yes
	Am07g00880	NAC	Am07g00880.T01	GO:0003677(DNA binding);GO:0005634(nucleus);GO:0006351(transcription, DNA-templated);GO:0006355(regulation of transcription, DNA-templated)	NA	NA	NA	PREDICTED: NAC domain-containing protein 21/22 [Erythranthe guttata]	NA	0.856782	0.658682	0.664249	2.10336	1.96855	2.29895	0.342138	-1.54735	6.551e-06	0.000143329	down	yes
	Am07g00890	FAR1	Am07g00890.T01	NA	NA	NA	NA	PREDICTED: protein FAR1-RELATED SEQUENCE 5-like [Erythranthe guttata]	NA	1.39918	1.02791	1.96805	0.578687	0.907524	0.620802	2.08596	1.06071	0.0327848	0.153652	up	yes
	Am07g01040	C2H2	Am07g01040.T01	GO:0003700(DNA binding transcription factor activity);GO:0005634(nucleus);GO:0043565(sequence-specific DNA binding);GO:0044212(transcription regulatory region DNA binding)	NA	NA	NA	uncharacterized protein LOC105175037 [Sesamum indicum]	NA	0.155314	0.901557	1.37969	1.89373	1.94935	1.39189	0.46544	-1.10333	0.0359011	0.163392	down	yes
	Am07g02820	GRAS	Am07g02820.T01	GO:0003700(DNA binding transcription factor activity);GO:0005634(nucleus);GO:0006355(regulation of transcription, DNA-templated);GO:0008356(asymmetric cell division);GO:0009630(gravitropism);GO:0009956(radial pattern formation);GO:0043565(sequence-specific DNA binding);GO:0048366(leaf development);GO:0051457(maintenance of protein location in nucleus);GO:0090610(bundle sheath cell fate specificat…	04075(Plant hormone signal transduction)	K14494	NA	hypothetical protein MIMGU_mgv1a005350mg [Erythranthe guttata]	NA	1.9345	2.29781	2.02136	0.975796	1.17715	0.642071	2.23744	1.16185	0.000647597	0.00749293	up	yes
	Am07g05140	HB-HD-ZIP	Am07g05140.T01	GO:0003677(DNA binding);GO:0003700(DNA binding transcription factor activity);GO:0005515(protein binding);GO:0005634(nucleus);GO:0006351(transcription, DNA-templated);GO:0006355(regulation of transcription, DNA-templated);GO:0008289(lipid binding);GO:0009845(seed germination);GO:0009913(epidermal cell differentiation);GO:0043565(sequence-specific DNA binding);GO:0048497(maintenance of floral orga…	NA	NA	NA	hypothetical protein CDL12_24476 [Handroanthus impetiginosus]	NA	7.45638	8.42421	8.75371	3.24894	2.86047	3.73711	2.50183	1.32298	2.01452e-08	8.03524e-07	up	yes
	Am07g06890	MYB	Am07g06890.T01;Am07g06890.T02	GO:0000981(RNA polymerase II transcription factor activity, sequence-specific DNA binding);GO:0001135(transcription factor activity, RNA polymerase II transcription factor recruiting);GO:0003677(DNA binding);GO:0003700(DNA binding transcription factor activity);GO:0005515(protein binding);GO:0005634(nucleus);GO:0006351(transcription, DNA-templated);GO:0006355(regulation of transcription, DNA-temp…	NA	NA	NA	transcription factor MYB3-like [Sesamum indicum]	NA	2.02081	2.61121	1.66368	0.293138	0.647225	0.391311	4.72765	2.24112	4.67471e-07	1.40613e-05	up	yes
	Am07g08130	C2H2	Am07g08130.T01	GO:0003700(DNA binding transcription factor activity);GO:0005634(nucleus);GO:0010200(response to chitin);GO:0043565(sequence-specific DNA binding);GO:0044212(transcription regulatory region DNA binding)	NA	NA	NA	Uncharacterized protein TCM_042836 [Theobroma cacao]	NA	1.65803	1.78359	2.57366	10.3595	14.3388	11.9372	0.164193	-2.60654	8.56299e-16	8.94788e-14	down	yes
	Am07g17140	WRKY	Am07g17140.T01	GO:0003700(DNA binding transcription factor activity);GO:0005634(nucleus);GO:0006351(transcription, DNA-templated);GO:0006355(regulation of transcription, DNA-templated);GO:0010228(vegetative to reproductive phase transition of meristem);GO:0045893(positive regulation of transcription, DNA-templated);GO:1990837(sequence-specific double-stranded DNA binding)	NA	NA	NA	probable WRKY transcription factor 71 [Olea europaea var. sylvestris]	NA	2.08757	2.06496	2.3759	15.9304	19.8051	17.2652	0.123176	-3.0212	1.27247e-30	4.32706e-28	down	yes
	Am07g18020	bHLH	Am07g18020.T01	GO:0003677(DNA binding);GO:0003700(DNA binding transcription factor activity);GO:0005634(nucleus);GO:0006351(transcription, DNA-templated);GO:0006355(regulation of transcription, DNA-templated);GO:0046983(protein dimerization activity)	NA	NA	NA	hypothetical protein CDL12_14331 [Handroanthus impetiginosus]	NA	0.482477	0.091495	0.687032	1.02311	0.909159	0.986344	0.432056	-1.21071	0.0208693	0.111505	down	yes
	Am07g21200	WRKY	Am07g21200.T01	GO:0003700(DNA binding transcription factor activity);GO:0005515(protein binding);GO:0005634(nucleus);GO:0006351(transcription, DNA-templated);GO:0006355(regulation of transcription, DNA-templated);GO:0009751(response to salicylic acid);GO:0009753(response to jasmonic acid);GO:0009862(systemic acquired resistance, salicylic acid mediated signaling pathway);GO:0009864(induced systemic resistance, …	04626(Plant-pathogen interaction)	K13459	NA	hypothetical protein CDL12_02441 [Handroanthus impetiginosus]	NA	11.6491	12.3337	13.6904	4.7817	4.30581	4.73951	2.72461	1.44605	8.45749e-09	3.61027e-07	up	yes
	Am07g21210	WRKY	Am07g21210.T01	GO:0003700(DNA binding transcription factor activity);GO:0005634(nucleus);GO:0006351(transcription, DNA-templated);GO:0006355(regulation of transcription, DNA-templated);GO:0043565(sequence-specific DNA binding)	04626(Plant-pathogen interaction)	K16225	NA	WRKY transcription factor 55 [Sesamum indicum]	NA	1.65631	1.78195	1.6765	0.470387	1.0954	0.923915	2.05437	1.0387	0.0199262	0.108019	up	yes
	Am07g21420	bZIP	Am07g21420.T01	GO:0003700(DNA binding transcription factor activity);GO:0005634(nucleus)	04016(MAPK signaling pathway - plant)	K20557	NA	transcription factor RF2b [Sesamum indicum]	NA	8.41398	6.4549	7.19807	3.95686	3.03913	3.01381	2.20453	1.14047	9.94809e-05	0.00152707	up	yes
	Am07g30620	AP2/ERF-ERF	Am07g30620.T01	GO:0003677(DNA binding);GO:0003700(DNA binding transcription factor activity);GO:0005634(nucleus);GO:0006351(transcription, DNA-templated);GO:0006355(regulation of transcription, DNA-templated);GO:0009873(ethylene-activated signaling pathway)	NA	NA	NA	hypothetical protein CDL12_10579 [Handroanthus impetiginosus]	NA	0.158307	0.181825	0.424876	0.787664	0.900558	0.676118	0.323561	-1.62789	0.00118708	0.0123722	down	yes
	Am07g31840	MYB-related	Am07g31840.T01;Am07g31840.T02	GO:0003682(chromatin binding);GO:0003700(DNA binding transcription factor activity);GO:0003713(transcription coactivator activity);GO:0004402(histone acetyltransferase activity);GO:0005634(nucleus);GO:0006338(chromatin remodeling);GO:0006357(regulation of transcription by RNA polymerase II);GO:0035066(positive regulation of histone acetylation);GO:0035066(positive regulation of histone acetylatio…	NA	NA	NA	putative MYB transcription factor [Avicennia marina]	NA	1.44376	1.42514	1.19619	4.41946	4.26178	4.47452	0.308998	-1.69433	1.39403e-06	3.70444e-05	down	yes
	Am07g34290	C2H2	Am07g34290.T01	GO:0003700(DNA binding transcription factor activity);GO:0005634(nucleus);GO:0043565(sequence-specific DNA binding);GO:0044212(transcription regulatory region DNA binding)	NA	NA	NA	zinc finger protein ZAT5-like [Sesamum indicum]	NA	1.1395	0.860446	1.03456	2.11489	2.7296	2.13568	0.434732	-1.2018	0.00124752	0.0128551	down	yes
	Am08g04860	bZIP	Am08g04860.T01	GO:0003677(DNA binding);GO:0003700(DNA binding transcription factor activity);GO:0005515(protein binding);GO:0005634(nucleus);GO:0006351(transcription, DNA-templated);GO:0006355(regulation of transcription, DNA-templated);GO:0006971(hypotonic response);GO:0009267(cellular response to starvation);GO:0043565(sequence-specific DNA binding);GO:0045735(nutrient reservoir activity);GO:0045893(positive …	NA	NA	NA	hypothetical protein CDL12_12182 [Handroanthus impetiginosus]	NA	2.49164	2.08493	1.82612	1.03014	0.994818	0.956758	2.14732	1.10253	0.00194801	0.0182562	up	yes
	Am08g05010	bHLH	Am08g05010.T03;Am08g05010.T02;Am08g05010.T04;Am08g05010.T01	GO:0005634(nucleus);GO:0005634(nucleus)	NA	NA	NA	transcription factor bHLH63 isoform X2 [Sesamum indicum];hypothetical protein F511_35616 [Dorcoceras hygrometricum]	NA	0.902725	1.1067	0.983485	0.395572	0.270584	0.0538552	4.15674	2.05545	0.00020373	0.00286435	up	yes
	Am08g06620	AP2/ERF-ERF	Am08g06620.T01	GO:0003677(DNA binding);GO:0003700(DNA binding transcription factor activity);GO:0005634(nucleus);GO:0006351(transcription, DNA-templated);GO:0006355(regulation of transcription, DNA-templated);GO:0009873(ethylene-activated signaling pathway);GO:0010087(phloem or xylem histogenesis);GO:0010200(response to chitin);GO:0050832(defense response to fungus);GO:0051301(cell division)	NA	NA	NA	ethylene-responsive transcription factor ERF109 [Sesamum indicum]	NA	0.684221	1.88724	1.04815	3.87049	2.76909	1.68628	0.434743	-1.20177	0.00364323	0.0298329	down	yes
	Am08g22450	C2C2-CO-like	Am08g22450.T01	GO:0005634(nucleus);GO:0009416(response to light stimulus);GO:0009909(regulation of flower development)	04712(Circadian rhythm - plant)	K12135	NA	zinc finger protein CONSTANS-LIKE 2 [Sesamum indicum]	NA	17.8607	17.5362	18.6043	6.88559	7.51542	9.08454	2.29934	1.20122	1.34113e-06	3.57333e-05	up	yes
	Am08g23040	B3	Am08g23040.T01	NA	NA	NA	NA	B3 domain-containing protein At1g49475-like [Sesamum indicum]	NA	0.8071	1.00352	1.34691	2.66857	3.55072	3.75766	0.316483	-1.6598	3.44736e-06	8.17545e-05	down	yes
	Am08g28320	Trihelix	Am08g28320.T01	GO:0003677(DNA binding);GO:0003700(DNA binding transcription factor activity);GO:0005634(nucleus);GO:0006351(transcription, DNA-templated);GO:0006355(regulation of transcription, DNA-templated);GO:0009909(regulation of flower development);GO:0010200(response to chitin);GO:0042803(protein homodimerization activity);GO:0046621(negative regulation of organ growth);GO:0048441(petal development);GO:00…	00040(Pentose and glucuronate interconversions)	K01051	EC:3.1.1.11	trihelix transcription factor PTL [Sesamum indicum]	NA	3.61149	3.84406	3.95655	0.556281	1.04775	1.25516	3.99137	1.99689	4.61954e-09	2.08743e-07	up	yes
	Am08g30590	B3-ARF	Am08g30590.T04;Am08g30590.T03;Am08g30590.T01;Am08g30590.T02;Am08g30590.T05	GO:0003677(DNA binding);GO:0003700(DNA binding transcription factor activity);GO:0005515(protein binding);GO:0005634(nucleus);GO:0006351(transcription, DNA-templated);GO:0006355(regulation of transcription, DNA-templated);GO:0009723(response to ethylene);GO:0009733(response to auxin);GO:0009734(auxin-activated signaling pathway);GO:0010311(lateral root formation);GO:0043565(sequence-specific DNA …	04075(Plant hormone signal transduction);04075(Plant hormone signal transduction)	K14486	NA	Auxin response factor 16 [Zea mays];auxin response factor 19 isoform X1 [Sesamum indicum];hypothetical protein CUMW_030420 [Citrus unshiu]	NA	2.15951	2.06146	3.73182	1.15951	1.0133	1.22149	2.34299	1.22835	6.72935e-05	0.00110123	up	yes
	Am08g30610	AP2/ERF-ERF	Am08g30610.T01	GO:0003677(DNA binding);GO:0003700(DNA binding transcription factor activity);GO:0005634(nucleus);GO:0006351(transcription, DNA-templated);GO:0006355(regulation of transcription, DNA-templated);GO:0009873(ethylene-activated signaling pathway)	NA	NA	NA	hypothetical protein CDL12_10579 [Handroanthus impetiginosus]	NA	1.91489	2.096	3.23208	1.21692	1.1523	0.757131	2.31675	1.2121	0.00311485	0.0264578	up	yes
	Am08g31930	MYB-related	Am08g31930.T01	GO:0003682(chromatin binding);GO:0003700(DNA binding transcription factor activity);GO:0003713(transcription coactivator activity);GO:0004402(histone acetyltransferase activity);GO:0005634(nucleus);GO:0006338(chromatin remodeling);GO:0006357(regulation of transcription by RNA polymerase II);GO:0035066(positive regulation of histone acetylation)	NA	NA	NA	putative MYB transcription factor [Avicennia marina]	NA	1.10431	0.620967	1.55489	2.2211	3.41299	2.60473	0.398137	-1.32866	0.000993786	0.0106622	down	yes
	Am08g32760	AP2/ERF-ERF	Am08g32760.T01	GO:0003677(DNA binding);GO:0003700(DNA binding transcription factor activity);GO:0005634(nucleus);GO:0006351(transcription, DNA-templated);GO:0006355(regulation of transcription, DNA-templated);GO:0009873(ethylene-activated signaling pathway);GO:0043565(sequence-specific DNA binding);GO:0045893(positive regulation of transcription, DNA-templated)	NA	NA	NA	hypothetical protein CDL12_13712 [Handroanthus impetiginosus]	NA	12.5857	9.96157	13.3668	4.29547	4.10916	5.48338	2.58598	1.37071	1.03124e-06	2.80729e-05	up	yes
	Am08g34630	GRAS	Am08g34630.T01	GO:0003700(DNA binding transcription factor activity);GO:0005634(nucleus);GO:0006355(regulation of transcription, DNA-templated);GO:0043565(sequence-specific DNA binding)	04075(Plant hormone signal transduction)	K14494	NA	hypothetical protein CDL12_24441 [Handroanthus impetiginosus]	NA	0.122208	0.140376	0.213143	0.402413	0.247286	0.581446	0.38641	-1.37179	0.00520082	0.0397501	down	yes
	Am08g37510	WRKY	Am08g37510.T02;Am08g37510.T01	GO:0003700(DNA binding transcription factor activity);GO:0005515(protein binding);GO:0005634(nucleus);GO:0006351(transcription, DNA-templated);GO:0006355(regulation of transcription, DNA-templated);GO:0009751(response to salicylic acid);GO:0009753(response to jasmonic acid);GO:0009862(systemic acquired resistance, salicylic acid mediated signaling pathway);GO:0009864(induced systemic resistance, …	04626(Plant-pathogen interaction);04626(Plant-pathogen interaction)	K13459	NA	hypothetical protein CDL12_05914 [Handroanthus impetiginosus];probable WRKY transcription factor 70 [Herrania umbratica]	NA	6.44887	6.84181	6.38367	1.62714	1.66904	1.90422	3.78323	1.91962	9.98673e-14	8.11189e-12	up	yes
WL vs WLI	Am01g13040	C2C2-CO-like	Am01g13040.T01	GO:0003700(DNA binding transcription factor activity);GO:0005515(protein binding);GO:0005634(nucleus);GO:0006355(regulation of transcription, DNA-templated);GO:0008270(zinc ion binding);GO:0016020(membrane)	04712(Circadian rhythm - plant)	K12135	NA	zinc finger protein CONSTANS-LIKE 16 [Sesamum indicum]	NA	21.6967	22.2187	23.8235	55.423	53.0179	57.9053	0.407216	-1.29613	3.5478e-11	3.69145e-09	down	yes
	Am01g20520	B3	Am01g20520.T02;Am01g20520.T01	NA	NA	NA	NA	putative B3 domain-containing protein At5g66980 [Sesamum indicum]	NA	1.08943	0.710683	1.37902	3.19064	3.30739	2.35895	0.35894	-1.47818	0.000103789	0.00211388	down	yes
	Am01g26390	LOB	Am01g26390.T01	GO:0005634(nucleus);GO:0005739(mitochondrion);GO:0008150(biological_process)	NA	NA	NA	hypothetical protein CDL12_22916 [Handroanthus impetiginosus]	NA	1.37618	0.682588	0.84316	2.2065	2.78843	2.71358	0.376459	-1.40944	0.00144783	0.0189077	down	yes
	Am01g26800	AP2/ERF-ERF	Am01g26800.T01	GO:0003700(DNA binding transcription factor activity);GO:0005634(nucleus);GO:0043565(sequence-specific DNA binding);GO:0044212(transcription regulatory region DNA binding);GO:0045893(positive regulation of transcription, DNA-templated)	NA	NA	NA	dehydration-responsive element-binding protein 2A-like [Sesamum indicum]	NA	14.4024	14.8284	12.5445	6.01351	6.68399	6.49679	2.17644	1.12197	2.85697e-07	1.27498e-05	up	yes
	Am01g31440	MYB	Am01g31440.T01;Am01g31440.T02	GO:0000981(RNA polymerase II transcription factor activity, sequence-specific DNA binding);GO:0001135(transcription factor activity, RNA polymerase II transcription factor recruiting);GO:0003677(DNA binding);GO:0003700(DNA binding transcription factor activity);GO:0005634(nucleus);GO:0006355(regulation of transcription, DNA-templated);GO:0006357(regulation of transcription by RNA polymerase II);G…	NA	NA	NA	transcription factor MYB124-like isoform X1 [Sesamum indicum]	NA	1.14439	1.1912	1.21663	0.647727	0.701166	0.206595	2.28366	1.19135	0.00340742	0.0369813	up	yes
	Am01g32850	zf-HD	Am01g32850.T01	NA	NA	NA	NA	hypothetical protein CDL12_29674 [Handroanthus impetiginosus]	NA	9.82712	13.7071	10.3653	25.573	25.9027	27.5418	0.429014	-1.2209	3.34513e-06	0.000112355	down	yes
	Am01g46390	WRKY	Am01g46390.T01;Am01g46390.T03;Am01g46390.T02	GO:0003700(DNA binding transcription factor activity);GO:0005516(calmodulin binding);GO:0005634(nucleus);GO:0006351(transcription, DNA-templated);GO:0006355(regulation of transcription, DNA-templated);GO:0043565(sequence-specific DNA binding);GO:0010200(response to chitin);GO:0042742(defense response to bacterium);GO:0042742(defense response to bacterium)	04016(MAPK signaling pathway - plant);04626(Plant-pathogen interaction);04626(Plant-pathogen interaction)	K13425	NA	probable WRKY transcription factor 7 [Sesamum indicum];WRKY protein [Salvia miltiorrhiza]	NA	31.3212	32.5404	36.1752	14.8234	15.4861	15.1869	2.19879	1.13671	7.57043e-11	7.35716e-09	up	yes
	Am01g58760	bHLH	Am01g58760.T01	GO:0003677(DNA binding);GO:0003700(DNA binding transcription factor activity);GO:0005634(nucleus);GO:0006351(transcription, DNA-templated);GO:0006355(regulation of transcription, DNA-templated);GO:0046983(protein dimerization activity)	04016(MAPK signaling pathway - plant);04075(Plant hormone signal transduction)	K13422	NA	transcription factor bHLH18-like [Sesamum indicum]	NA	0.604562	1.17921	1.30107	0.0001	0.177736	0.100376	11.0881	3.47094	5.75008e-07	2.42246e-05	up	yes
	Am02g01030	WRKY	Am02g01030.T01	GO:0003700(DNA binding transcription factor activity);GO:0005634(nucleus);GO:0006351(transcription, DNA-templated);GO:0006355(regulation of transcription, DNA-templated);GO:0009555(pollen development);GO:0009793(embryo development ending in seed dormancy);GO:0043565(sequence-specific DNA binding)	04016(MAPK signaling pathway - plant);04626(Plant-pathogen interaction)	K13425	NA	WRKY protein [Salvia miltiorrhiza]	NA	0.239849	0.471637	0.46407	0.0001	0.196109	0.0001	5.98829	2.58215	0.00286108	0.0322208	up	yes
	Am02g02110	Tify	Am02g02110.T01;Am02g02110.T02	GO:0003714(transcription corepressor activity);GO:0005634(nucleus);GO:0009611(response to wounding);GO:0031347(regulation of defense response);GO:1903507(negative regulation of nucleic acid-templated transcription);GO:2000022(regulation of jasmonic acid mediated signaling pathway);GO:2000022(regulation of jasmonic acid mediated signaling pathway)	NA	NA	NA	hypothetical protein CDL12_23409 [Handroanthus impetiginosus]	NA	17.2944	16.8562	16.756	5.02193	5.04155	6.15668	3.13847	1.65006	5.91528e-17	1.50997e-14	up	yes
	Am02g02640	WRKY	Am02g02640.T01	GO:0003700(DNA binding transcription factor activity);GO:0005634(nucleus);GO:0006351(transcription, DNA-templated);GO:0006355(regulation of transcription, DNA-templated);GO:0043565(sequence-specific DNA binding)	04626(Plant-pathogen interaction)	K18835	NA	probable WRKY transcription factor 71 [Olea europaea var. sylvestris]	NA	13.8548	12.4252	11.7509	4.96684	5.29183	5.67429	2.38693	1.25516	1.66015e-08	9.66068e-07	up	yes
	Am02g04680	HB-other	Am02g04680.T01	GO:0003700(DNA binding transcription factor activity);GO:0005634(nucleus);GO:0006351(transcription, DNA-templated);GO:0006355(regulation of transcription, DNA-templated);GO:0009637(response to blue light);GO:0009646(response to absence of light);GO:0043565(sequence-specific DNA binding)	NA	NA	NA	hypothetical protein CDL12_21415 [Handroanthus impetiginosus]	NA	21.7746	24.1527	23.6233	57.8713	53.9628	61.6804	0.400834	-1.31892	1.60385e-09	1.17349e-07	down	yes
	Am02g10690	NAC	Am02g10690.T01	GO:0003677(DNA binding);GO:0003700(DNA binding transcription factor activity);GO:0005634(nucleus);GO:0005992(trehalose biosynthetic process);GO:0006351(transcription, DNA-templated);GO:0006355(regulation of transcription, DNA-templated);GO:0006561(proline biosynthetic process);GO:0007275(multicellular organism development);GO:0009718(anthocyanin-containing compound biosynthetic process);GO:001012…	04141(Protein processing in endoplasmic reticulum);04120(Ubiquitin mediated proteolysis)	K03094	NA	transcription factor JUNGBRUNNEN 1-like [Sesamum indicum]	NA	1.30615	1.98841	1.91754	0.434261	0.499364	1.29407	2.33968	1.22631	0.00893022	0.0774667	up	yes
	Am02g24760	B3	Am02g24760.T01	GO:0003674(molecular_function);GO:0005886(plasma membrane);GO:0008150(biological_process);GO:0009507(chloroplast);GO:0016021(integral component of membrane)	NA	NA	NA	uncharacterized protein LOC105170136 [Sesamum indicum]	NA	0.482207	0.395786	0.596726	0.281354	0.099216	0.190947	2.58036	1.36757	0.00397569	0.0414568	up	yes
	Am02g32550	B3-ARF	Am02g32550.T01	GO:0003700(DNA binding transcription factor activity);GO:0005515(protein binding);GO:0005634(nucleus);GO:0006351(transcription, DNA-templated);GO:0006355(regulation of transcription, DNA-templated);GO:0009734(auxin-activated signaling pathway);GO:0043565(sequence-specific DNA binding)	04075(Plant hormone signal transduction)	K14486	NA	auxin response factor 9 [Sesamum indicum]	NA	0.638569	0.389996	0.698213	0.313851	0.269201	0.173057	2.28377	1.19142	0.00671433	0.0628453	up	yes
	Am02g35800	Trihelix	Am02g35800.T01	GO:0003700(DNA binding transcription factor activity);GO:0005634(nucleus);GO:0006355(regulation of transcription, DNA-templated);GO:0043565(sequence-specific DNA binding)	NA	NA	NA	trihelix transcription factor ASIL2 [Sesamum indicum]	NA	12.2786	10.0867	10.3079	22.4997	24.4268	23.2388	0.465659	-1.10265	5.07231e-07	2.16757e-05	down	yes
	Am02g36370	bZIP	Am02g36370.T01;Am02g36370.T03;Am02g36370.T02	GO:0000977(RNA polymerase II regulatory region sequence-specific DNA binding);GO:0003700(DNA binding transcription factor activity);GO:0005515(protein binding);GO:0005634(nucleus);GO:0005829(cytosol);GO:0006351(transcription, DNA-templated);GO:0006355(regulation of transcription, DNA-templated);GO:0009737(response to abscisic acid);GO:0043565(sequence-specific DNA binding);GO:0044212(transcriptio…	NA	NA	NA	common plant regulatory factor 1 isoform X3 [Sesamum indicum]	NA	16.9576	17.0165	14.1566	4.26308	2.7247	13.6573	2.33134	1.22116	0.00239293	0.0281578	up	yes
	Am02g41090	C2H2	Am02g41090.T01	GO:0001709(cell fate determination);GO:0003676(nucleic acid binding);GO:0003700(DNA binding transcription factor activity);GO:0005634(nucleus);GO:0006351(transcription, DNA-templated);GO:0006355(regulation of transcription, DNA-templated);GO:0008270(zinc ion binding);GO:0009860(pollen tube growth);GO:0010468(regulation of gene expression);GO:0010500(transmitting tissue development);GO:0046872(met…	NA	NA	NA	C2H2-type Zn-finger protein [Handroanthus impetiginosus]	NA	1.14955	0.776845	1.69221	0.0001	0.0001	0.0001	12062	13.5582	3.92565e-15	8.08135e-13	up	yes
	Am02g47270	AP2/ERF-ERF	Am02g47270.T01	GO:0003677(DNA binding);GO:0003700(DNA binding transcription factor activity);GO:0005515(protein binding);GO:0005634(nucleus);GO:0006351(transcription, DNA-templated);GO:0006355(regulation of transcription, DNA-templated);GO:0009409(response to cold);GO:0009414(response to water deprivation);GO:0009631(cold acclimation)	NA	NA	NA	dehydration-responsive element-binding protein 1D-like [Sesamum indicum]	NA	0.887299	0.2755	0.900096	0.189411	0.0001	0.481167	3.07584	1.62098	0.0322302	0.190564	up	yes
	Am02g49850	LOB	Am02g49850.T01	GO:0005515(protein binding);GO:0005634(nucleus);GO:0008150(biological_process)	NA	NA	NA	LOB domain-containing protein 4-like [Sesamum indicum]	NA	0.96799	1.25898	1.45621	0.825081	0.394	0.111809	2.76745	1.46856	0.0104573	0.0863323	up	yes
	Am02g51370	C2H2	Am02g51370.T01	GO:0001709(cell fate determination);GO:0003676(nucleic acid binding);GO:0003700(DNA binding transcription factor activity);GO:0005634(nucleus);GO:0006351(transcription, DNA-templated);GO:0006355(regulation of transcription, DNA-templated);GO:0008270(zinc ion binding);GO:0009860(pollen tube growth);GO:0010468(regulation of gene expression);GO:0010500(transmitting tissue development);GO:0046872(met…	NA	NA	NA	PREDICTED: zinc finger protein WIP2 [Vitis vinifera]	NA	1.00176	1.42945	0.753766	0.491308	0.34516	0.406618	2.56215	1.35736	0.00367206	0.0391652	up	yes
	Am02g51890	NF-YA	Am02g51890.T01;Am02g51890.T04;Am02g51890.T03;Am02g51890.T05;Am02g51890.T02	GO:0003677(DNA binding);GO:0003700(DNA binding transcription factor activity);GO:0005515(protein binding);GO:0005634(nucleus);GO:0006351(transcription, DNA-templated);GO:0006355(regulation of transcription, DNA-templated);GO:0009555(pollen development);GO:0009793(embryo development ending in seed dormancy);GO:0010262(somatic embryogenesis);GO:0016602(CCAAT-binding factor complex);GO:0045892(negat…	NA	NA	NA	YA4 [Antirrhinum majus]	NA	1.77662	0.753288	1.98336	0.354596	0.442146	0.344989	3.95301	1.98295	1.73964e-07	8.1527e-06	up	yes
	Am02g55440	C2H2	Am02g55440.T01	GO:0003676(nucleic acid binding);GO:0003677(DNA binding);GO:0003700(DNA binding transcription factor activity);GO:0005634(nucleus);GO:0006351(transcription, DNA-templated);GO:0006355(regulation of transcription, DNA-templated);GO:0008270(zinc ion binding);GO:0046872(metal ion binding)	00052(Galactose metabolism);00600(Sphingolipid metabolism);00531(Glycosaminoglycan degradation);00604(Glycosphingolipid biosynthesis - ganglio series);00511(Other glycan degradation)	K12309	EC:3.2.1.23	protein indeterminate-domain 12 [Sesamum indicum]	NA	1.63018	1.44143	1.83192	0.440001	0.55474	0.922501	2.5576	1.35479	0.000804189	0.01183	up	yes
	Am02g55450	HSF	Am02g55450.T01;Am02g55450.T03;Am02g55450.T02	GO:0042802(identical protein binding);GO:0042802(identical protein binding)	NA	NA	NA	heat stress transcription factor A-7a [Sesamum indicum];heat stress transcription factor A-2b-like isoform X2 [Coffea arabica]	NA	8.25359	8.52812	7.58968	2.923	2.89596	3.53344	2.6059	1.38178	7.37458e-10	5.85835e-08	up	yes
	Am03g01760	C2H2	Am03g01760.T01	GO:0003676(nucleic acid binding);GO:0003700(DNA binding transcription factor activity);GO:0005634(nucleus);GO:0006355(regulation of transcription, DNA-templated)	NA	NA	NA	uncharacterized protein LOC105174809 [Sesamum indicum]	NA	3.33521	3.45876	3.47087	1.14972	1.31499	2.50403	2.06588	1.04676	0.00110645	0.0152945	up	yes
	Am03g03810	HSF	Am03g03810.T01;Am03g03810.T02	GO:0003677(DNA binding);GO:0003700(DNA binding transcription factor activity);GO:0005634(nucleus);GO:0006351(transcription, DNA-templated);GO:0006355(regulation of transcription, DNA-templated);GO:0009408(response to heat);GO:0009733(response to auxin);GO:0009958(positive gravitropism);GO:0043565(sequence-specific DNA binding);GO:0048364(root development);GO:0048527(lateral root development);GO:0…	NA	NA	NA	heat stress transcription factor A-4b [Sesamum indicum];heat stress transcription factor A-4b-like [Sesamum indicum]	NA	39.4489	64.1321	65.3046	16.4241	18.2845	17.5227	3.23341	1.69306	1.15289e-15	2.55057e-13	up	yes
	Am03g06370	BES1	Am03g06370.T01	GO:0003677(DNA binding);GO:0003700(DNA binding transcription factor activity);GO:0005634(nucleus);GO:0006351(transcription, DNA-templated);GO:0006355(regulation of transcription, DNA-templated);GO:0009742(brassinosteroid mediated signaling pathway)	04075(Plant hormone signal transduction)	K14503	NA	BES1/BZR1 homolog protein 4 isoform X1 [Sesamum indicum]	NA	0.965815	1.08732	1.63954	0.660673	0.695488	0.159733	2.43598	1.2845	0.0106659	0.0874002	up	yes
	Am03g07770	AP2/ERF-AP2	Am03g07770.T02;Am03g07770.T01	GO:0003677(DNA binding);GO:0003700(DNA binding transcription factor activity);GO:0005634(nucleus);GO:0006351(transcription, DNA-templated);GO:0006355(regulation of transcription, DNA-templated);GO:0007275(multicellular organism development);GO:0009791(post-embryonic development);GO:0009845(seed germination);GO:0009873(ethylene-activated signaling pathway);GO:0010311(lateral root formation);GO:004…	NA	NA	NA	AP2-like ethylene-responsive transcription factor AIL5 isoform X1 [Sesamum indicum]	NA	1.53925	1.07285	0.798847	0.584256	0.428097	0.221241	2.76504	1.4673	0.00133289	0.0177456	up	yes
	Am03g11430	bZIP	Am03g11430.T01	GO:0000977(RNA polymerase II regulatory region sequence-specific DNA binding);GO:0003677(DNA binding);GO:0003700(DNA binding transcription factor activity);GO:0005634(nucleus);GO:0009555(pollen development);GO:0045893(positive regulation of transcription, DNA-templated)	04141(Protein processing in endoplasmic reticulum)	K04374	NA	basic leucine zipper 61 [Sesamum indicum]	NA	11.2991	11.0632	9.64027	3.33503	5.6027	3.37574	2.59898	1.37795	1.70277e-07	8.02944e-06	up	yes
	Am03g18940	MYB	Am03g18940.T01	GO:0000981(RNA polymerase II transcription factor activity, sequence-specific DNA binding);GO:0001135(transcription factor activity, RNA polymerase II transcription factor recruiting);GO:0003677(DNA binding);GO:0003700(DNA binding transcription factor activity);GO:0005634(nucleus);GO:0006351(transcription, DNA-templated);GO:0006355(regulation of transcription, DNA-templated);GO:0006357(regulation…	NA	NA	NA	myb-related protein 330-like [Dorcoceras hygrometricum]	NA	2.47267	3.25047	3.41237	10.0751	7.45565	8.48302	0.35118	-1.50972	3.3469e-07	1.48325e-05	down	yes
	Am03g34130	bHLH	Am03g34130.T01;Am03g34130.T02	GO:0003677(DNA binding);GO:0003700(DNA binding transcription factor activity);GO:0005634(nucleus);GO:0006351(transcription, DNA-templated);GO:0006355(regulation of transcription, DNA-templated);GO:0046983(protein dimerization activity);GO:0046983(protein dimerization activity)	NA	NA	NA	hypothetical protein CDL12_03596 [Handroanthus impetiginosus]	NA	5.67926	5.6788	4.95692	2.74293	3.06257	2.31923	2.00807	1.00581	1.03633e-05	0.000297013	up	yes
	Am03g39640	LOB	Am03g39640.T01	GO:0005634(nucleus);GO:0006807(nitrogen compound metabolic process);GO:0060776(simple leaf morphogenesis)	NA	NA	NA	PREDICTED: LOB domain-containing protein 38-like [Ipomoea nil]	NA	1.13867	1.42975	0.859393	0.519377	0.15458	0.301342	3.51463	1.81337	0.000482799	0.00766843	up	yes
	Am03g39660	C2H2	Am03g39660.T01	GO:0003700(DNA binding transcription factor activity);GO:0005634(nucleus);GO:0010200(response to chitin);GO:0043565(sequence-specific DNA binding);GO:0044212(transcription regulatory region DNA binding)	NA	NA	NA	hypothetical protein MIMGU_mgv1a024189mg, partial [Erythranthe guttata]	NA	6.40835	6.07856	3.84572	1.73467	1.97704	1.27404	3.27587	1.71188	2.08769e-06	7.39163e-05	up	yes
	Am03g44150	MYB-related	Am03g44150.T01;Am03g44150.T02;Am03g44150.T04;Am03g44150.T03;Am03g44150.T05	GO:0003677(DNA binding);GO:0003700(DNA binding transcription factor activity);GO:0005634(nucleus);GO:0006351(transcription, DNA-templated);GO:0006355(regulation of transcription, DNA-templated);GO:0009651(response to salt stress);GO:0009723(response to ethylene);GO:0009737(response to abscisic acid);GO:0009739(response to gibberellin);GO:0009751(response to salicylic acid);GO:0009753(response to …	04712(Circadian rhythm - plant);04712(Circadian rhythm - plant)	K12133	NA	protein REVEILLE 6 isoform X3 [Sesamum indicum];protein REVEILLE 6-like isoform X3 [Olea europaea var. sylvestris]	NA	7.77412	7.39599	8.40488	2.81643	3.17507	3.37103	2.51802	1.33229	1.55728e-09	1.15558e-07	up	yes
	Am04g15630	MYB	Am04g15630.T01	GO:0000981(RNA polymerase II transcription factor activity, sequence-specific DNA binding);GO:0001046(core promoter sequence-specific DNA binding);GO:0001135(transcription factor activity, RNA polymerase II transcription factor recruiting);GO:0003677(DNA binding);GO:0003700(DNA binding transcription factor activity);GO:0005634(nucleus);GO:0006351(transcription, DNA-templated);GO:0006355(regulatio…	NA	NA	NA	MYB-related transcription factor [Salvia miltiorrhiza]	NA	29.0668	25.3229	28.4008	10.6336	11.3001	10.5685	2.54723	1.34893	2.01112e-12	2.54986e-10	up	yes
	Am04g19600	MYB-related	Am04g19600.T01	GO:0003677(DNA binding);GO:0003700(DNA binding transcription factor activity);GO:0005634(nucleus);GO:0006351(transcription, DNA-templated);GO:0006355(regulation of transcription, DNA-templated)	NA	NA	NA	transcription factor DIVARICATA [Dorcoceras hygrometricum]	NA	3.60531	4.29905	3.47946	8.09704	7.54078	8.13577	0.478843	-1.06238	0.000126717	0.00250103	down	yes
	Am04g22050	WRKY	Am04g22050.T01	GO:0009737(response to abscisic acid)	04626(Plant-pathogen interaction)	K16225	NA	hypothetical protein CDL12_00098 [Handroanthus impetiginosus]	NA	80.8059	92.8517	89.4004	22.9193	24.2448	22.3997	3.78154	1.91897	1.88164e-26	1.02926e-23	up	yes
	Am04g27400	WRKY	Am04g27400.T01	GO:0009737(response to abscisic acid)	04626(Plant-pathogen interaction)	K16225	NA	probable WRKY transcription factor 53 [Sesamum indicum]	NA	649.678	635.022	633.835	252.216	269.18	255.849	2.46838	1.30356	8.49931e-14	1.45285e-11	up	yes
	Am05g46010	AP2/ERF-ERF	Am05g46010.T01	GO:0003677(DNA binding);GO:0003700(DNA binding transcription factor activity);GO:0005634(nucleus);GO:0006351(transcription, DNA-templated);GO:0006355(regulation of transcription, DNA-templated);GO:0009873(ethylene-activated signaling pathway);GO:0010087(phloem or xylem histogenesis);GO:0010200(response to chitin);GO:0050832(defense response to fungus);GO:0051301(cell division)	03040(Spliceosome)	K12900	NA	ethylene-responsive transcription factor ERF109 [Sesamum indicum]	NA	43.5898	43.8858	43.8133	14.4399	11.8428	14.4947	3.21964	1.6869	3.52492e-19	1.07118e-16	up	yes
	Am06g09800	FAR1	Am06g09800.T01	GO:0005515(protein binding);GO:0005634(nucleus);GO:0006355(regulation of transcription, DNA-templated);GO:0008270(zinc ion binding);GO:0009585(red, far-red light phototransduction);GO:0009639(response to red or far red light);GO:0045893(positive regulation of transcription, DNA-templated)	NA	NA	NA	PREDICTED: protein FAR1-RELATED SEQUENCE 5-like [Erythranthe guttata]	NA	2.80302	3.63904	3.46135	1.83979	1.16886	1.72019	2.09426	1.06644	0.000240973	0.0043278	up	yes
	Am06g14150	Tify	Am06g14150.T03;Am06g14150.T01;Am06g14150.T02	NA	04075(Plant hormone signal transduction);04075(Plant hormone signal transduction)	K13464	NA	hypothetical protein CDL12_27590 [Handroanthus impetiginosus]	NA	0.593311	0.640929	0.228251	0.247478	0.294238	0.160779	2.08185	1.05787	0.026368	0.165231	up	yes
	Am06g22030	HB-other	Am06g22030.T01	NA	NA	NA	NA	homeobox-leucine zipper protein ATHB-23-like [Sesamum indicum]	NA	2.65267	2.66035	3.97187	1.00389	1.75298	1.27955	2.30028	1.20181	0.00729322	0.0666485	up	yes
	Am06g29900	MYB	Am06g29900.T02;Am06g29900.T01	GO:0000981(RNA polymerase II transcription factor activity, sequence-specific DNA binding);GO:0001135(transcription factor activity, RNA polymerase II transcription factor recruiting);GO:0003677(DNA binding);GO:0003700(DNA binding transcription factor activity);GO:0005634(nucleus);GO:0006351(transcription, DNA-templated);GO:0006355(regulation of transcription, DNA-templated);GO:0006357(regulation…	NA	NA	NA	transcription factor MYB56-like [Sesamum indicum]	NA	6.02217	8.72222	8.99964	3.66135	2.33297	3.16889	2.59124	1.37364	1.01579e-07	5.02513e-06	up	yes
	Am06g31570	MYB-related	Am06g31570.T01	NA	NA	NA	NA		NA	1.66368	1.31962	1.60775	0.0001	0.464245	0.347366	5.65601	2.49979	0.000139876	0.00271594	up	yes
	Am06g31750	GRAS	Am06g31750.T01	GO:0003700(DNA binding transcription factor activity);GO:0005634(nucleus);GO:0006355(regulation of transcription, DNA-templated);GO:0043565(sequence-specific DNA binding)	04075(Plant hormone signal transduction)	K14494	NA	scarecrow-like protein 4 [Sesamum indicum]	NA	18.8737	16.4924	20.344	37.6533	45.7052	38.0117	0.45901	-1.1234	6.85482e-08	3.52784e-06	down	yes
	Am06g34440	NAC	Am06g34440.T01	GO:0003677(DNA binding);GO:0003700(DNA binding transcription factor activity);GO:0005634(nucleus);GO:0006351(transcription, DNA-templated);GO:0006355(regulation of transcription, DNA-templated);GO:0007275(multicellular organism development)	NA	NA	NA	hypothetical protein CDL12_16569 [Handroanthus impetiginosus]	NA	6.93203	5.78638	5.43808	12.7898	13.583	12.131	0.47155	-1.08452	2.63375e-05	0.000665086	down	yes
	Am07g00250	NAC	Am07g00250.T01	GO:0003677(DNA binding);GO:0003700(DNA binding transcription factor activity);GO:0005634(nucleus);GO:0005992(trehalose biosynthetic process);GO:0006351(transcription, DNA-templated);GO:0006355(regulation of transcription, DNA-templated);GO:0006561(proline biosynthetic process);GO:0007275(multicellular organism development);GO:0009718(anthocyanin-containing compound biosynthetic process);GO:001012…	04141(Protein processing in endoplasmic reticulum);04120(Ubiquitin mediated proteolysis)	K03094	NA	NAC042 transcription factor [Fraxinus mandshurica]	NA	4.81281	5.43483	5.41598	1.60314	2.41298	3.66523	2.03918	1.02799	0.001305	0.0174593	up	yes
	Am07g04670	MYB	Am07g04670.T01	GO:0000981(RNA polymerase II transcription factor activity, sequence-specific DNA binding);GO:0001135(transcription factor activity, RNA polymerase II transcription factor recruiting);GO:0003677(DNA binding);GO:0003700(DNA binding transcription factor activity);GO:0005634(nucleus);GO:0006351(transcription, DNA-templated);GO:0006355(regulation of transcription, DNA-templated);GO:0006357(regulation…	NA	NA	NA	protein ODORANT1 [Sesamum indicum]	NA	1.99352	1.68631	2.00744	0.401691	1.05362	0.334026	3.17843	1.66831	0.000373271	0.00619281	up	yes
	Am07g06890	MYB	Am07g06890.T01;Am07g06890.T02	GO:0000981(RNA polymerase II transcription factor activity, sequence-specific DNA binding);GO:0001135(transcription factor activity, RNA polymerase II transcription factor recruiting);GO:0003677(DNA binding);GO:0003700(DNA binding transcription factor activity);GO:0005515(protein binding);GO:0005634(nucleus);GO:0006351(transcription, DNA-templated);GO:0006355(regulation of transcription, DNA-temp…	NA	NA	NA	transcription factor MYB3-like [Sesamum indicum]	NA	1.41916	1.57405	1.12959	38.9992	37.7451	0.0001	0.0537211	-4.21837	0.00123948	0.0167702	down	yes
	Am07g17140	WRKY	Am07g17140.T01	GO:0003700(DNA binding transcription factor activity);GO:0005634(nucleus);GO:0006351(transcription, DNA-templated);GO:0006355(regulation of transcription, DNA-templated);GO:0010228(vegetative to reproductive phase transition of meristem);GO:0045893(positive regulation of transcription, DNA-templated);GO:1990837(sequence-specific double-stranded DNA binding)	NA	NA	NA	probable WRKY transcription factor 71 [Olea europaea var. sylvestris]	NA	1.02805	0.630463	1.12348	0.169647	0.708549	0.268537	2.42602	1.27859	0.0211338	0.142502	up	yes
	Am07g18550	AP2/ERF-ERF	Am07g18550.T01	GO:0003677(DNA binding);GO:0003700(DNA binding transcription factor activity);GO:0005515(protein binding);GO:0005634(nucleus);GO:0006351(transcription, DNA-templated);GO:0009409(response to cold);GO:0009414(response to water deprivation);GO:0009631(cold acclimation);GO:0045893(positive regulation of transcription, DNA-templated)	NA	NA	NA	CRT/DRE-binding factor 2 [Avicennia marina]	NA	6.98641	5.17897	8.44307	18.4956	18.344	19.8022	0.363838	-1.45863	5.40262e-08	2.8494e-06	down	yes
	Am07g18570	AP2/ERF-ERF	Am07g18570.T01	GO:0003677(DNA binding);GO:0003700(DNA binding transcription factor activity);GO:0005515(protein binding);GO:0005634(nucleus);GO:0006351(transcription, DNA-templated);GO:0009409(response to cold);GO:0009414(response to water deprivation);GO:0009631(cold acclimation);GO:0045893(positive regulation of transcription, DNA-templated)	NA	NA	NA	CRT/DRE-binding factor 2 [Avicennia marina]	NA	9.34387	8.23959	7.67223	23.7433	19.3736	23.6633	0.378191	-1.40281	2.01915e-09	1.45326e-07	down	yes
	Am07g18600	AP2/ERF-ERF	Am07g18600.T01	GO:0003677(DNA binding);GO:0003700(DNA binding transcription factor activity);GO:0005515(protein binding);GO:0005634(nucleus);GO:0006351(transcription, DNA-templated);GO:0009409(response to cold);GO:0009414(response to water deprivation);GO:0009631(cold acclimation);GO:0045893(positive regulation of transcription, DNA-templated)	NA	NA	NA	CRT/DRE-binding factor 2 [Avicennia marina]	NA	3.79292	2.51372	2.82071	8.67821	8.25174	8.58224	0.357764	-1.48292	8.41457e-07	3.37729e-05	down	yes
	Am07g28410	GARP-G2-like	Am07g28410.T01;Am07g28410.T02	GO:0003677(DNA binding);GO:0003700(DNA binding transcription factor activity);GO:0005634(nucleus);GO:0006351(transcription, DNA-templated);GO:0006355(regulation of transcription, DNA-templated);GO:0006355(regulation of transcription, DNA-templated)	NA	NA	NA	hypothetical protein CDL12_10543 [Handroanthus impetiginosus]	NA	0.702796	0.844987	0.539247	0.349179	0.410073	0.264939	2.03774	1.02697	0.0174148	0.125327	up	yes
	Am07g36670	Trihelix	Am07g36670.T01	GO:0003700(DNA binding transcription factor activity);GO:0005515(protein binding);GO:0005634(nucleus);GO:0005730(nucleolus);GO:0006351(transcription, DNA-templated);GO:0006355(regulation of transcription, DNA-templated);GO:0016592(mediator complex);GO:0043565(sequence-specific DNA binding)	NA	NA	NA	trihelix transcription factor GT-3b [Sesamum indicum]	NA	3.68198	3.46348	4.55518	1.2984	1.05214	1.25002	3.24967	1.70029	2.11932e-08	1.2148e-06	up	yes
	Am08g01200	bHLH	Am08g01200.T01	GO:0003677(DNA binding);GO:0003700(DNA binding transcription factor activity);GO:0005634(nucleus);GO:0006351(transcription, DNA-templated);GO:0006355(regulation of transcription, DNA-templated);GO:0046983(protein dimerization activity)	04016(MAPK signaling pathway - plant);04075(Plant hormone signal transduction)	K13422	NA	transcription factor bHLH18-like [Sesamum indicum]	NA	2.34105	2.27169	1.77266	0.394771	0.730459	0.232052	4.70455	2.23406	1.08722e-06	4.17968e-05	up	yes
	Am08g05010	bHLH	Am08g05010.T03;Am08g05010.T01;Am08g05010.T02;Am08g05010.T04	GO:0005634(nucleus);GO:0005634(nucleus)	NA	NA	NA	transcription factor bHLH63 isoform X2 [Sesamum indicum];hypothetical protein F511_35616 [Dorcoceras hygrometricum]	NA	5.88139	5.8767	5.32358	2.99494	2.6876	1.93609	2.24209	1.16485	2.30217e-06	8.05761e-05	up	yes
	Am08g27930	OFP	Am08g27930.T01	GO:0005515(protein binding);GO:0005634(nucleus);GO:0006351(transcription, DNA-templated);GO:0045892(negative regulation of transcription, DNA-templated)	NA	NA	NA	hypothetical protein CDL12_19933 [Handroanthus impetiginosus]	NA	6.50135	7.55482	7.56016	24.2402	21.0622	19.3893	0.334144	-1.58146	5.31961e-10	4.35231e-08	down	yes
LTWL vs LTWLI	Am01g02920	C2H2	Am01g02920.T01	GO:0003700(DNA binding transcription factor activity)	NA	NA	NA	LOW QUALITY PROTEIN: protein SENSITIVE TO PROTON RHIZOTOXICITY 1 [Sesamum indicum]	NA	6.3263	6.91958	6.82388	2.29702	3.22054	2.03761	2.65643	1.40949	1.07239e-07	2.81352e-06	up	yes
	Am01g04700	C2H2	Am01g04700.T01	GO:0003700(DNA binding transcription factor activity);GO:0005634(nucleus);GO:0043565(sequence-specific DNA binding);GO:0044212(transcription regulatory region DNA binding);GO:0048235(pollen sperm cell differentiation)	NA	NA	NA	uncharacterized protein LOC105160026 [Sesamum indicum]	NA	2.61482	2.50348	1.71014	0.469713	0.496009	0.783144	3.90449	1.96514	4.65858e-07	1.04937e-05	up	yes
	Am01g12940	bZIP	Am01g12940.T01	GO:0003677(DNA binding);GO:0003700(DNA binding transcription factor activity);GO:0005515(protein binding);GO:0005634(nucleus);GO:0006351(transcription, DNA-templated);GO:0006355(regulation of transcription, DNA-templated);GO:0009909(regulation of flower development);GO:0043565(sequence-specific DNA binding)	04075(Plant hormone signal transduction)	K14431	NA	transcription factor HBP-1b(c38)-like [Sesamum indicum]	NA	0.321955	0.466316	0.525293	1.07534	0.973933	2.08278	0.317895	-1.65338	0.000813079	0.00631846	down	yes
	Am01g17630	SBP	Am01g17630.T01	GO:0003677(DNA binding);GO:0003700(DNA binding transcription factor activity);GO:0005634(nucleus);GO:0006351(transcription, DNA-templated);GO:0006355(regulation of transcription, DNA-templated);GO:0016021(integral component of membrane);GO:0046872(metal ion binding)	NA	NA	NA	LOW QUALITY PROTEIN: squamosa promoter-binding-like protein 12 [Coffea arabica]	NA	18.0065	18.5795	18.992	8.45844	6.80889	5.82647	2.63481	1.3977	6.30912e-09	2.1485e-07	up	yes
	Am01g22110	AP2/ERF-ERF	Am01g22110.T01	GO:0003677(DNA binding);GO:0003700(DNA binding transcription factor activity);GO:0005515(protein binding);GO:0005634(nucleus);GO:0006351(transcription, DNA-templated);GO:0009409(response to cold);GO:0009414(response to water deprivation);GO:0009631(cold acclimation);GO:0045893(positive regulation of transcription, DNA-templated)	NA	NA	NA	dehydration-responsive element-binding protein 1B [Sesamum indicum]	NA	0.271061	0.121441	0.256326	0.837831	0.979834	0.924771	0.236588	-2.07955	0.000276699	0.00259966	down	yes
	Am01g22120	AP2/ERF-ERF	Am01g22120.T01	GO:0003677(DNA binding);GO:0003700(DNA binding transcription factor activity);GO:0005515(protein binding);GO:0005634(nucleus);GO:0006351(transcription, DNA-templated);GO:0009409(response to cold);GO:0009414(response to water deprivation);GO:0009631(cold acclimation);GO:0045893(positive regulation of transcription, DNA-templated)	NA	NA	NA	dehydration-responsive element-binding protein 1B [Sesamum indicum]	NA	0.237279	0.294971	0.197399	4.36055	2.61708	2.7209	0.0752329	-3.73249	1.63645e-13	1.25863e-11	down	yes
	Am01g22950	WRKY	Am01g22950.T01;Am01g22950.T03;Am01g22950.T02	GO:0003700(DNA binding transcription factor activity);GO:0005515(protein binding);GO:0005634(nucleus);GO:0006351(transcription, DNA-templated);GO:0006355(regulation of transcription, DNA-templated);GO:0009751(response to salicylic acid);GO:0031347(regulation of defense response);GO:0043565(sequence-specific DNA binding);GO:1900056(negative regulation of leaf senescence);GO:1900056(negative regula…	04626(Plant-pathogen interaction);04626(Plant-pathogen interaction)	K13459	NA	hypothetical protein CDL12_05914 [Handroanthus impetiginosus]	NA	47.3014	48.3438	52.1767	22.8975	23.8591	24.3848	2.07786	1.0551	1.04079e-08	3.3793e-07	up	yes
	Am01g23920	NAC	Am01g23920.T01	GO:0003677(DNA binding);GO:0003700(DNA binding transcription factor activity);GO:0005634(nucleus);GO:0005737(cytoplasm);GO:0006351(transcription, DNA-templated);GO:0007275(multicellular organism development);GO:0009644(response to high light intensity);GO:0009962(regulation of flavonoid biosynthetic process);GO:0016021(integral component of membrane);GO:0045893(positive regulation of transcriptio…	04141(Protein processing in endoplasmic reticulum);04120(Ubiquitin mediated proteolysis)	K03094	NA	NAC domain-containing protein 78-like [Helianthus annuus]	NA	0.421045	0.638737	0.495214	1.54331	1.47953	1.47083	0.346042	-1.53098	0.000320467	0.00292263	down	yes
	Am01g26390	LOB	Am01g26390.T01	GO:0005634(nucleus);GO:0005739(mitochondrion);GO:0008150(biological_process)	NA	NA	NA	hypothetical protein CDL12_22916 [Handroanthus impetiginosus]	NA	4.27855	4.563	4.33037	1.20893	1.01868	1.54035	3.49577	1.80561	6.44224e-08	1.79002e-06	up	yes
	Am01g30660	AP2/ERF-ERF	Am01g30660.T01	GO:0003677(DNA binding);GO:0003700(DNA binding transcription factor activity);GO:0005634(nucleus);GO:0006351(transcription, DNA-templated);GO:0006355(regulation of transcription, DNA-templated);GO:0009873(ethylene-activated signaling pathway)	NA	NA	NA	hypothetical protein CDL12_10579 [Handroanthus impetiginosus]	NA	0.572159	0.587305	0.397225	5.04766	4.79251	4.97734	0.105057	-3.25075	9.82334e-20	1.54036e-17	down	yes
	Am01g32890	zf-HD	Am01g32890.T01	GO:0003677(DNA binding);GO:0003700(DNA binding transcription factor activity);GO:0005515(protein binding);GO:0005634(nucleus);GO:0005737(cytoplasm);GO:0006351(transcription, DNA-templated);GO:0007275(multicellular organism development);GO:0009640(photomorphogenesis);GO:0009723(response to ethylene);GO:0009733(response to auxin);GO:0009735(response to cytokinin);GO:0009737(response to abscisic aci…	NA	NA	NA	hypothetical protein CDL12_29674 [Handroanthus impetiginosus]	NA	5.91143	8.03226	7.67678	1.75637	1.68189	1.23695	4.62448	2.20929	1.42325e-12	9.40836e-11	up	yes
	Am01g34970	C2H2	Am01g34970.T01	GO:0003676(nucleic acid binding);GO:0005634(nucleus);GO:0008150(biological_process);GO:0008270(zinc ion binding)	NA	NA	NA	A20/AN1-type zinc-finger protein [Fraxinus velutina]	NA	1.60432	1.12539	1.37347	0.379687	0.923431	0.697423	2.05103	1.03635	0.0232396	0.0863916	up	yes
	Am01g45540	MYB-related	Am01g45540.T01	GO:0003677(DNA binding);GO:0003700(DNA binding transcription factor activity);GO:0005634(nucleus);GO:0006351(transcription, DNA-templated);GO:0006355(regulation of transcription, DNA-templated)	NA	NA	NA	myb-like protein RL3 [Antirrhinum majus]	NA	4.90085	5.54	4.66789	15.3391	11.8913	14.7283	0.360085	-1.47359	4.8291e-08	1.38361e-06	down	yes
	Am01g45990	MYB	Am01g45990.T01	GO:0000981(RNA polymerase II transcription factor activity, sequence-specific DNA binding);GO:0001135(transcription factor activity, RNA polymerase II transcription factor recruiting);GO:0003677(DNA binding);GO:0003700(DNA binding transcription factor activity);GO:0005515(protein binding);GO:0005634(nucleus);GO:0006351(transcription, DNA-templated);GO:0006355(regulation of transcription, DNA-temp…	NA	NA	NA	transcription factor MYB44-like [Sesamum indicum]	NA	4.69052	3.69387	4.2444	11.4484	9.424	8.95598	0.423382	-1.23997	2.60853e-06	4.73232e-05	down	yes
	Am01g49350	BES1	Am01g49350.T01	GO:0003677(DNA binding);GO:0003700(DNA binding transcription factor activity);GO:0005634(nucleus);GO:0006351(transcription, DNA-templated);GO:0006355(regulation of transcription, DNA-templated);GO:0009742(brassinosteroid mediated signaling pathway)	04075(Plant hormone signal transduction)	K14503	NA	hypothetical protein CDL12_05871 [Handroanthus impetiginosus]	NA	6.41978	6.62639	9.25085	3.50965	3.62977	3.78005	2.04195	1.02995	0.00012699	0.00134914	up	yes
	Am01g60090	AP2/ERF-ERF	Am01g60090.T01	GO:0003677(DNA binding);GO:0003700(DNA binding transcription factor activity);GO:0005622(intracellular);GO:0005634(nucleus);GO:0006351(transcription, DNA-templated);GO:0006355(regulation of transcription, DNA-templated);GO:0009873(ethylene-activated signaling pathway)	04016(MAPK signaling pathway - plant);04075(Plant hormone signal transduction)	K14516	NA	ethylene-responsive transcription factor ERF096 [Sesamum indicum]	NA	17.9291	15.3749	14.2863	4.69148	6.49116	6.64463	2.66953	1.41658	2.00442e-06	3.78223e-05	up	yes
	Am02g04980	SBP	Am02g04980.T01	GO:0003677(DNA binding);GO:0003700(DNA binding transcription factor activity);GO:0005634(nucleus);GO:0005737(cytoplasm);GO:0006351(transcription, DNA-templated);GO:0006355(regulation of transcription, DNA-templated);GO:0010321(regulation of vegetative phase change);GO:0046872(metal ion binding)	NA	NA	NA	RecName: Full=Squamosa promoter-binding protein 1	NA	26.2715	24.1986	27.7384	54.3933	53.1649	55.0758	0.480887	-1.05623	9.506e-07	1.96212e-05	down	yes
	Am02g05550	C2C2-Dof	Am02g05550.T01	GO:0003677(DNA binding);GO:0003700(DNA binding transcription factor activity);GO:0005634(nucleus);GO:0006351(transcription, DNA-templated);GO:0006355(regulation of transcription, DNA-templated);GO:0046872(metal ion binding)	NA	NA	NA	hypothetical protein CDL12_11031 [Handroanthus impetiginosus]	NA	1.05568	1.11274	1.36281	0.200182	0.771739	0.705932	2.10461	1.07355	0.0358165	0.117043	up	yes
	Am02g07190	MYB-related	Am02g07190.T01	GO:0000981(RNA polymerase II transcription factor activity, sequence-specific DNA binding);GO:0001135(transcription factor activity, RNA polymerase II transcription factor recruiting);GO:0003677(DNA binding);GO:0003700(DNA binding transcription factor activity);GO:0005515(protein binding);GO:0005634(nucleus);GO:0006351(transcription, DNA-templated);GO:0006355(regulation of transcription, DNA-temp…	NA	NA	NA	PREDICTED: transcription factor CPC [Eucalyptus grandis]	NA	23.3381	24.7902	25.382	58.3116	61.1629	64.6413	0.399261	-1.3246	9.24448e-10	3.73248e-08	down	yes
	Am02g07290	HB-HD-ZIP	Am02g07290.T01	GO:0003677(DNA binding);GO:0003700(DNA binding transcription factor activity);GO:0005515(protein binding);GO:0005634(nucleus);GO:0006351(transcription, DNA-templated);GO:0006355(regulation of transcription, DNA-templated);GO:0008289(lipid binding);GO:0009845(seed germination);GO:0009913(epidermal cell differentiation);GO:0043565(sequence-specific DNA binding);GO:0048497(maintenance of floral orga…	NA	NA	NA	homeobox-leucine zipper protein MERISTEM L1 [Sesamum indicum]	NA	1.0283	0.957958	0.796002	2.26298	1.95508	2.39452	0.420753	-1.24895	4.03634e-05	0.000516754	down	yes
	Am02g07650	HB-KNOX	Am02g07650.T01	GO:0003700(DNA binding transcription factor activity);GO:0003723(RNA binding);GO:0005515(protein binding);GO:0005634(nucleus);GO:0005737(cytoplasm);GO:0006355(regulation of transcription, DNA-templated);GO:0009691(cytokinin biosynthetic process);GO:0009934(regulation of meristem structural organization);GO:0015630(microtubule cytoskeleton);GO:0019827(stem cell population maintenance);GO:0042803(p…	NA	NA	NA	invaginata [Antirrhinum majus]	NA	0.531978	0.527361	0.29408	0.0001	0.0001	0.0001	4511.4	12.1394	4.02413e-11	2.06599e-09	up	yes
	Am02g07860	WRKY	Am02g07860.T01;Am02g07860.T02	GO:0003700(DNA binding transcription factor activity);GO:0005515(protein binding);GO:0005634(nucleus);GO:0006351(transcription, DNA-templated);GO:0006355(regulation of transcription, DNA-templated);GO:0009873(ethylene-activated signaling pathway);GO:0010200(response to chitin);GO:0016036(cellular response to phosphate starvation);GO:0043565(sequence-specific DNA binding);GO:0044212(transcription …	04016(MAPK signaling pathway - plant);04626(Plant-pathogen interaction);00970(Aminoacyl-tRNA biosynthesis);00970(Aminoacyl-tRNA biosynthesis)	K13424;K01892	EC:6.1.1.21	WRKY transcription factor 6 [Sesamum indicum]	NA	54.0129	59.4995	56.355	24.5927	24.8754	23.188	2.33796	1.22525	3.6133e-11	1.86198e-09	up	yes
	Am02g13410	WRKY	Am02g13410.T01;Am02g13410.T02	GO:0003700(DNA binding transcription factor activity);GO:0005515(protein binding);GO:0005634(nucleus);GO:0006351(transcription, DNA-templated);GO:0006355(regulation of transcription, DNA-templated);GO:0009873(ethylene-activated signaling pathway);GO:0010200(response to chitin);GO:0016036(cellular response to phosphate starvation);GO:0043565(sequence-specific DNA binding);GO:0044212(transcription …	04626(Plant-pathogen interaction);04626(Plant-pathogen interaction)	K18834	NA	WRKY transcription factor 6-like [Dorcoceras hygrometricum]	NA	0.664502	0.614257	0.572141	0.093345	0.133993	0.075526	6.11132	2.61148	1.78272e-05	0.000254667	up	yes
	Am02g14170	WRKY	Am02g14170.T01	GO:0003700(DNA binding transcription factor activity);GO:0005515(protein binding);GO:0005634(nucleus);GO:0006351(transcription, DNA-templated);GO:0006355(regulation of transcription, DNA-templated);GO:0009873(ethylene-activated signaling pathway);GO:0010200(response to chitin);GO:0016036(cellular response to phosphate starvation);GO:0043565(sequence-specific DNA binding);GO:0044212(transcription …	04016(MAPK signaling pathway - plant);04626(Plant-pathogen interaction)	K13424	NA	probable WRKY transcription factor 31 [Sesamum indicum]	NA	1.06092	0.867246	1.28172	0.248325	0.445381	0.700905	2.30163	1.20266	0.016731	0.0676328	up	yes
	Am02g21020	WRKY	Am02g21020.T01	GO:0003700(DNA binding transcription factor activity);GO:0005634(nucleus);GO:0006351(transcription, DNA-templated);GO:0006355(regulation of transcription, DNA-templated);GO:0009555(pollen development);GO:0009793(embryo development ending in seed dormancy);GO:0043565(sequence-specific DNA binding)	04016(MAPK signaling pathway - plant);04626(Plant-pathogen interaction)	K13425	NA	probable WRKY transcription factor 35 [Sesamum indicum]	NA	5.36735	6.03557	5.95268	12.5792	12.0759	14.4064	0.444315	-1.17035	1.46958e-07	3.73451e-06	down	yes
	Am02g23400	bHLH	Am02g23400.T01;Am02g23400.T02	GO:0003677(DNA binding);GO:0003700(DNA binding transcription factor activity);GO:0005515(protein binding);GO:0005634(nucleus);GO:0006351(transcription, DNA-templated);GO:0009409(response to cold);GO:0010440(stomatal lineage progression);GO:0045893(positive regulation of transcription, DNA-templated);GO:0046983(protein dimerization activity);GO:0050826(response to freezing);GO:0050826(response to …	NA	NA	NA	transcription factor ICE1 [Sesamum indicum]	NA	0.259274	0.296536	0.356481	0.820635	0.847921	0.417503	0.437328	-1.19321	0.0138118	0.0587199	down	yes
	Am02g36310	MADS-MIKC	Am02g36310.T01;Am02g36310.T02	GO:0000977(RNA polymerase II regulatory region sequence-specific DNA binding);GO:0003677(DNA binding);GO:0003700(DNA binding transcription factor activity);GO:0004601(peroxidase activity);GO:0005515(protein binding);GO:0005634(nucleus);GO:0005737(cytoplasm);GO:0006351(transcription, DNA-templated);GO:0009793(embryo development ending in seed dormancy);GO:0009910(negative regulation of flower deve…	NA	NA	NA	agamous-like MADS-box protein AGL15 [Sesamum indicum]	NA	7.82914	6.85645	7.29646	14.8632	16.5789	16.9788	0.453978	-1.13931	7.3815e-08	2.02321e-06	down	yes
	Am02g36960	WRKY	Am02g36960.T01	GO:0003700(DNA binding transcription factor activity);GO:0005634(nucleus);GO:0006351(transcription, DNA-templated);GO:0006355(regulation of transcription, DNA-templated);GO:0006952(defense response);GO:0010150(leaf senescence);GO:0010200(response to chitin);GO:0043565(sequence-specific DNA binding)	04016(MAPK signaling pathway - plant);04626(Plant-pathogen interaction)	K13425	NA	WRKY transcription factor 22 [Sesamum indicum]	NA	3.78598	5.03605	2.26057	8.36124	7.15037	10.5917	0.424567	-1.23594	0.00164101	0.0111992	down	yes
	Am02g41090	C2H2	Am02g41090.T01	GO:0001709(cell fate determination);GO:0003676(nucleic acid binding);GO:0003700(DNA binding transcription factor activity);GO:0005634(nucleus);GO:0006351(transcription, DNA-templated);GO:0006355(regulation of transcription, DNA-templated);GO:0008270(zinc ion binding);GO:0009860(pollen tube growth);GO:0010468(regulation of gene expression);GO:0010500(transmitting tissue development);GO:0046872(met…	NA	NA	NA	C2H2-type Zn-finger protein [Handroanthus impetiginosus]	NA	1.96448	1.07347	2.32623	0.715609	0.769563	0.519586	2.67573	1.41993	0.00345755	0.0200629	up	yes
	Am02g43180	AP2/ERF-ERF	Am02g43180.T01	GO:0003677(DNA binding);GO:0003700(DNA binding transcription factor activity);GO:0005515(protein binding);GO:0005634(nucleus);GO:0005737(cytoplasm);GO:0006351(transcription, DNA-templated);GO:0006355(regulation of transcription, DNA-templated);GO:0009736(cytokinin-activated signaling pathway);GO:0009873(ethylene-activated signaling pathway);GO:0048366(leaf development)	04626(Plant-pathogen interaction)	K13434	NA	hypothetical protein F511_25250 [Dorcoceras hygrometricum]	NA	5.38579	5.56874	3.68777	1.87489	1.56597	1.05631	3.25588	1.70305	4.709e-07	1.05955e-05	up	yes
	Am02g43350	WRKY	Am02g43350.T01	GO:0009737(response to abscisic acid)	04626(Plant-pathogen interaction)	K16225	NA	probable WRKY transcription factor 41 [Sesamum indicum]	NA	7.59442	7.68406	9.25618	3.74373	3.0376	1.80311	2.85804	1.51503	4.92133e-07	1.09998e-05	up	yes
	Am02g51270	AP2/ERF-ERF	Am02g51270.T01	GO:0003677(DNA binding);GO:0003700(DNA binding transcription factor activity);GO:0005622(intracellular);GO:0005634(nucleus);GO:0006351(transcription, DNA-templated);GO:0006355(regulation of transcription, DNA-templated);GO:0009873(ethylene-activated signaling pathway);GO:0010200(response to chitin)	NA	NA	NA	ethylene-responsive transcription factor ERF098-like [Coffea arabica]	NA	1.07657	2.2456	2.53697	1.37861	0.384887	0.438139	2.66126	1.41211	0.031682	0.107114	up	yes
	Am02g51370	C2H2	Am02g51370.T01	GO:0001709(cell fate determination);GO:0003676(nucleic acid binding);GO:0003700(DNA binding transcription factor activity);GO:0005634(nucleus);GO:0006351(transcription, DNA-templated);GO:0006355(regulation of transcription, DNA-templated);GO:0008270(zinc ion binding);GO:0009860(pollen tube growth);GO:0010468(regulation of gene expression);GO:0010500(transmitting tissue development);GO:0046872(met…	NA	NA	NA	PREDICTED: zinc finger protein WIP2 [Vitis vinifera]	NA	2.94615	2.78795	2.40099	1.66063	1.2006	1.10159	2.05286	1.03763	0.00423403	0.0235679	up	yes
	Am02g55100	C2C2-GATA	Am02g55100.T01	GO:0000977(RNA polymerase II regulatory region sequence-specific DNA binding);GO:0001085(RNA polymerase II transcription factor binding);GO:0001228(transcriptional activator activity, RNA polymerase II transcription regulatory region sequence-specific DNA binding);GO:0003682(chromatin binding);GO:0003700(DNA binding transcription factor activity);GO:0005634(nucleus);GO:0005667(transcription facto…	NA	NA	NA	hypothetical protein CDL12_26472 [Handroanthus impetiginosus]	NA	3.47737	3.71567	4.47352	1.08162	1.94234	2.59023	2.07805	1.05523	0.00765211	0.0374241	up	yes
	Am02g55450	HSF	Am02g55450.T01;Am02g55450.T03;Am02g55450.T02	GO:0042802(identical protein binding);GO:0042802(identical protein binding)	NA	NA	NA	heat stress transcription factor A-7a [Sesamum indicum];heat stress transcription factor A-2b-like isoform X2 [Coffea arabica]	NA	0.480005	0.409319	0.457289	1.22996	1.06058	1.12368	0.394412	-1.34222	0.000929355	0.00704874	down	yes
	Am03g07770	AP2/ERF-AP2	Am03g07770.T01;Am03g07770.T02	GO:0003677(DNA binding);GO:0003700(DNA binding transcription factor activity);GO:0005634(nucleus);GO:0006351(transcription, DNA-templated);GO:0006355(regulation of transcription, DNA-templated);GO:0007275(multicellular organism development);GO:0009791(post-embryonic development);GO:0009845(seed germination);GO:0009873(ethylene-activated signaling pathway);GO:0010311(lateral root formation);GO:004…	NA	NA	NA	AP2-like ethylene-responsive transcription factor AIL5 isoform X1 [Sesamum indicum]	NA	0.550571	1.22586	0.932018	1.83175	1.87626	3.3008	0.386434	-1.3717	0.000590039	0.0048282	down	yes
	Am03g08010	MADS-M-type	Am03g08010.T01	GO:0000977(RNA polymerase II regulatory region sequence-specific DNA binding);GO:0003677(DNA binding);GO:0003700(DNA binding transcription factor activity);GO:0005515(protein binding);GO:0005634(nucleus);GO:0006351(transcription, DNA-templated);GO:0007275(multicellular organism development);GO:0008134(transcription factor binding);GO:0009960(endosperm development);GO:0045944(positive regulation o…	NA	NA	NA	agamous-like MADS-box protein AGL62 [Populus trichocarpa]	NA	0.690818	0.601189	0.757448	1.02948	1.71187	2.04529	0.428161	-1.22377	0.027518	0.0973818	down	yes
	Am03g12330	GRAS	Am03g12330.T01	GO:0003700(DNA binding transcription factor activity);GO:0005634(nucleus);GO:0006355(regulation of transcription, DNA-templated);GO:0043565(sequence-specific DNA binding)	04075(Plant hormone signal transduction)	K14494	NA	scarecrow-like protein 3 [Sesamum indicum]	NA	3.10319	3.18026	3.69943	9.19113	7.97675	10.552	0.360134	-1.47339	9.49908e-09	3.12944e-07	down	yes
	Am03g12360	bHLH	Am03g12360.T01	NA	NA	NA	NA	transcription factor bHLH71-like isoform X1 [Olea europaea var. sylvestris]	NA	0.448122	0.945465	0.90593	2.06027	2.41278	1.99771	0.355371	-1.4926	0.000699453	0.00556591	down	yes
	Am03g16990	bHLH	Am03g16990.T01	NA	NA	NA	NA		NA	0.782337	1.1993	0.859215	2.58097	2.88681	3.11813	0.330874	-1.59565	1.46226e-06	2.88011e-05	down	yes
	Am03g18940	MYB	Am03g18940.T01	GO:0000981(RNA polymerase II transcription factor activity, sequence-specific DNA binding);GO:0001135(transcription factor activity, RNA polymerase II transcription factor recruiting);GO:0003677(DNA binding);GO:0003700(DNA binding transcription factor activity);GO:0005634(nucleus);GO:0006351(transcription, DNA-templated);GO:0006355(regulation of transcription, DNA-templated);GO:0006357(regulation…	NA	NA	NA	myb-related protein 330-like [Dorcoceras hygrometricum]	NA	54.038	56.8453	57.3999	14.8441	12.9705	14.509	3.97611	1.99136	8.65233e-23	1.84231e-20	up	yes
	Am03g25880	NAC	Am03g25880.T01	GO:0003677(DNA binding);GO:0003700(DNA binding transcription factor activity);GO:0005634(nucleus);GO:0005737(cytoplasm);GO:0006351(transcription, DNA-templated);GO:0006355(regulation of transcription, DNA-templated);GO:0007275(multicellular organism development)	NA	NA	NA	NAC domain-containing protein 92 [Sesamum indicum]	NA	3.92483	3.92058	3.5213	1.28115	1.26875	0.799585	3.39357	1.76281	1.32648e-07	3.40693e-06	up	yes
	Am03g30200	C2H2	Am03g30200.T01	GO:0003676(nucleic acid binding);GO:0003700(DNA binding transcription factor activity);GO:0005515(protein binding);GO:0005634(nucleus);GO:0006351(transcription, DNA-templated);GO:0006355(regulation of transcription, DNA-templated);GO:0008270(zinc ion binding);GO:0009736(cytokinin-activated signaling pathway);GO:0009740(gibberellic acid mediated signaling pathway);GO:0009873(ethylene-activated sig…	03410(Base excision repair)	K10773	EC:4.2.99.18	zinc finger protein 5 [Sesamum indicum]	NA	1.2137	0.929675	1.46201	0.0001	0.0001	0.0001	12018	13.5529	2.85124e-12	1.7856e-10	up	yes
	Am03g32160	NAC	Am03g32160.T01	GO:0003677(DNA binding);GO:0003700(DNA binding transcription factor activity);GO:0005634(nucleus);GO:0006351(transcription, DNA-templated);GO:0006355(regulation of transcription, DNA-templated);GO:0007275(multicellular organism development);GO:0009793(embryo development ending in seed dormancy);GO:0009825(multidimensional cell growth);GO:0009835(fruit ripening);GO:0009908(flower development);GO:0…	NA	NA	NA	LOW QUALITY PROTEIN: NAC transcription factor 29 [Sesamum indicum]	NA	26.572	25.34	27.346	7.52956	7.47519	7.49019	3.52337	1.81696	4.9541e-17	6.54977e-15	up	yes
	Am03g33610	bZIP	Am03g33610.T01	GO:0003677(DNA binding);GO:0003700(DNA binding transcription factor activity);GO:0005515(protein binding);GO:0005634(nucleus);GO:0006351(transcription, DNA-templated);GO:0006355(regulation of transcription, DNA-templated)	NA	NA	NA	basic leucine zipper 43 [Sesamum indicum]	NA	2.40987	2.17823	3.05046	1.15302	0.88202	1.67952	2.05638	1.04011	0.0238633	0.0878928	up	yes
	Am03g38280	MYB	Am03g38280.T01;Am03g38280.T02	GO:0000981(RNA polymerase II transcription factor activity, sequence-specific DNA binding);GO:0001135(transcription factor activity, RNA polymerase II transcription factor recruiting);GO:0003677(DNA binding);GO:0003700(DNA binding transcription factor activity);GO:0005515(protein binding);GO:0005634(nucleus);GO:0006351(transcription, DNA-templated);GO:0006355(regulation of transcription, DNA-temp…	NA	NA	NA	Transcription factor, Myb superfamily [Handroanthus impetiginosus];myb-related protein 308-like [Olea europaea var. sylvestris]	NA	2.34804	4.66326	3.94696	10.5834	8.83628	6.30108	0.426048	-1.23091	0.000143245	0.00148822	down	yes
	Am03g39680	C2H2	Am03g39680.T01	GO:0003700(DNA binding transcription factor activity);GO:0005634(nucleus);GO:0010200(response to chitin);GO:0043565(sequence-specific DNA binding);GO:0044212(transcription regulatory region DNA binding)	NA	NA	NA	Zinc finger protein [Actinidia chinensis var. chinensis]	NA	33.8677	38.2027	36.9967	110.227	99.2914	96.9666	0.355865	-1.4906	6.66212e-15	6.47891e-13	down	yes
	Am03g41230	MYB	Am03g41230.T01	GO:0000981(RNA polymerase II transcription factor activity, sequence-specific DNA binding);GO:0001135(transcription factor activity, RNA polymerase II transcription factor recruiting);GO:0003677(DNA binding);GO:0003700(DNA binding transcription factor activity);GO:0005634(nucleus);GO:0006351(transcription, DNA-templated);GO:0006355(regulation of transcription, DNA-templated);GO:0006357(regulation…	NA	NA	NA	transcription factor MYB86 [Sesamum indicum]	NA	5.10416	3.62273	3.43317	1.60997	1.47479	1.80339	2.48766	1.31479	7.37455e-05	0.000859784	up	yes
	Am04g01830	bHLH	Am04g01830.T01	NA	NA	NA	NA		NA	2.02917	2.0939	2.13057	4.14383	6.40296	6.09818	0.375707	-1.41232	2.07808e-06	3.88139e-05	down	yes
	Am04g03480	MYB-related	Am04g03480.T02;Am04g03480.T01	GO:0000981(RNA polymerase II transcription factor activity, sequence-specific DNA binding);GO:0001135(transcription factor activity, RNA polymerase II transcription factor recruiting);GO:0003677(DNA binding);GO:0005634(nucleus);GO:0006351(transcription, DNA-templated);GO:0006357(regulation of transcription by RNA polymerase II);GO:0030154(cell differentiation);GO:0043565(sequence-specific DNA bin…	NA	NA	NA	transcription factor MYB86 [Sesamum indicum]	NA	0.237795	0.213575	0.802287	1.32405	1.75791	2.23873	0.235619	-2.08547	0.000269608	0.00254876	down	yes
	Am04g04000	WRKY	Am04g04000.T01	GO:0002237(response to molecule of bacterial origin);GO:0003700(DNA binding transcription factor activity);GO:0005515(protein binding);GO:0005634(nucleus);GO:0006351(transcription, DNA-templated);GO:0006355(regulation of transcription, DNA-templated);GO:0009611(response to wounding);GO:0009751(response to salicylic acid);GO:0010200(response to chitin);GO:0031347(regulation of defense response);GO…	04016(MAPK signaling pathway - plant);04626(Plant-pathogen interaction)	K13424	NA	probable WRKY transcription factor 40 [Sesamum indicum]	NA	19.5038	6.63918	7.33909	0.997138	0.980079	0.923063	11.5444	3.52912	8.97888e-17	1.15685e-14	up	yes
	Am04g10320	WRKY	Am04g10320.T01	GO:0000122(negative regulation of transcription by RNA polymerase II);GO:0000978(RNA polymerase II proximal promoter sequence-specific DNA binding);GO:0003700(DNA binding transcription factor activity);GO:0005634(nucleus);GO:0006351(transcription, DNA-templated);GO:0006355(regulation of transcription, DNA-templated);GO:0010055(atrichoblast differentiation);GO:0032107(regulation of response to nut…	04016(MAPK signaling pathway - plant);04626(Plant-pathogen interaction)	K13423	NA	probable WRKY transcription factor 75 [Olea europaea var. sylvestris]	NA	54.5654	55.8441	48.8653	17.3739	23.8285	18.268	2.67822	1.42127	5.40653e-10	2.29491e-08	up	yes
	Am04g11470	AP2/ERF-ERF	Am04g11470.T01	GO:0003677(DNA binding);GO:0003700(DNA binding transcription factor activity);GO:0005515(protein binding);GO:0005634(nucleus);GO:0005737(cytoplasm);GO:0006351(transcription, DNA-templated);GO:0006355(regulation of transcription, DNA-templated);GO:0009736(cytokinin-activated signaling pathway);GO:0009873(ethylene-activated signaling pathway);GO:0048366(leaf development);GO:0048825(cotyledon develo…	04626(Plant-pathogen interaction)	K13434	NA	hypothetical protein CDL12_06486 [Handroanthus impetiginosus]	NA	87.7551	88.5223	88.284	43.3601	35.6539	37.2474	2.27557	1.18623	3.97857e-10	1.72331e-08	up	yes
	Am04g22050	WRKY	Am04g22050.T01	GO:0009737(response to abscisic acid)	04626(Plant-pathogen interaction)	K16225	NA	hypothetical protein CDL12_00098 [Handroanthus impetiginosus]	NA	7.02013	5.60612	5.8565	2.63614	2.2562	1.67151	2.81584	1.49357	2.00882e-06	3.78314e-05	up	yes
	Am04g27400	WRKY	Am04g27400.T01	GO:0009737(response to abscisic acid)	04626(Plant-pathogen interaction)	K16225	NA	probable WRKY transcription factor 53 [Sesamum indicum]	NA	32.7325	34.9257	35.1017	12.9181	16.4895	13.7034	2.38361	1.25315	2.57705e-09	9.46071e-08	up	yes
	Am04g30340	WRKY	Am04g30340.T01	GO:0002237(response to molecule of bacterial origin);GO:0003700(DNA binding transcription factor activity);GO:0005515(protein binding);GO:0005634(nucleus);GO:0006351(transcription, DNA-templated);GO:0006355(regulation of transcription, DNA-templated);GO:0009611(response to wounding);GO:0009751(response to salicylic acid);GO:0010200(response to chitin);GO:0031347(regulation of defense response);GO…	04016(MAPK signaling pathway - plant);04626(Plant-pathogen interaction)	K13424	NA	PREDICTED: probable WRKY transcription factor 40, partial [Erythranthe guttata]	NA	0.894838	1.37351	1.60601	0.680598	0.0001	0.0001	5.69091	2.50866	0.0094426	0.0442311	up	yes
	Am04g32290	C3H	Am04g32290.T01	GO:0003676(nucleic acid binding);GO:0003677(DNA binding);GO:0003700(DNA binding transcription factor activity);GO:0005634(nucleus);GO:0005886(plasma membrane);GO:0006355(regulation of transcription, DNA-templated);GO:0006979(response to oxidative stress);GO:0046872(metal ion binding)	NA	NA	NA	CCCH-type Zn-finger protein [Handroanthus impetiginosus]	NA	26.9935	27.997	24.0726	51.5965	50.953	56.2051	0.498021	-1.00572	4.84882e-07	1.08498e-05	down	yes
	Am04g33050	WRKY	Am04g33050.T01;Am04g33050.T02	GO:0003700(DNA binding transcription factor activity);GO:0005515(protein binding);GO:0005634(nucleus);GO:0006351(transcription, DNA-templated);GO:0006355(regulation of transcription, DNA-templated);GO:0009867(jasmonic acid mediated signaling pathway);GO:0042742(defense response to bacterium);GO:0043565(sequence-specific DNA binding);GO:0050832(defense response to fungus);GO:0050832(defense respon…	04626(Plant-pathogen interaction);04016(MAPK signaling pathway - plant);04016(MAPK signaling pathway - plant)	K13424;K18834	NA	probable WRKY transcription factor 50 [Sesamum indicum];probable WRKY transcription factor 75 [Solanum lycopersicum]	NA	38.47	40.2639	45.197	19.8319	21.4341	17.2255	2.11878	1.08324	2.00589e-07	4.94216e-06	up	yes
	Am04g34480	MADS-M-type	Am04g34480.T01	GO:0000976(transcription regulatory region sequence-specific DNA binding);GO:0000977(RNA polymerase II regulatory region sequence-specific DNA binding);GO:0000987(proximal promoter sequence-specific DNA binding);GO:0003677(DNA binding);GO:0003700(DNA binding transcription factor activity);GO:0005515(protein binding);GO:0005634(nucleus);GO:0006351(transcription, DNA-templated);GO:0043078(polar nuc…	NA	NA	NA	agamous-like MADS-box protein AGL80 [Sesamum indicum]	NA	4.94365	2.01661	3.83517	1.01764	0.495747	1.57442	3.49615	1.80577	0.00101891	0.00763349	up	yes
	Am04g37610	MYB	Am04g37610.T01;Am04g37610.T02	GO:0000981(RNA polymerase II transcription factor activity, sequence-specific DNA binding);GO:0001135(transcription factor activity, RNA polymerase II transcription factor recruiting);GO:0003677(DNA binding);GO:0003700(DNA binding transcription factor activity);GO:0005634(nucleus);GO:0006351(transcription, DNA-templated);GO:0006355(regulation of transcription, DNA-templated);GO:0006357(regulation…	NA	NA	NA	Transcription factor, Myb superfamily [Handroanthus impetiginosus];transcription factor MYB78-like [Solanum pennellii]	NA	11.2383	12.438	13.1317	2.66484	3.7728	2.01711	4.35354	2.12219	5.36398e-14	4.54977e-12	up	yes
	Am04g37730	WRKY	Am04g37730.T01;Am04g37730.T02	GO:0003677(DNA binding);GO:0003700(DNA binding transcription factor activity);GO:0005634(nucleus);GO:0006351(transcription, DNA-templated);GO:0006355(regulation of transcription, DNA-templated);GO:0009617(response to bacterium);GO:0010200(response to chitin);GO:0042742(defense response to bacterium);GO:0043565(sequence-specific DNA binding);GO:0045893(positive regulation of transcription, DNA-tem…	04016(MAPK signaling pathway - plant);04016(MAPK signaling pathway - plant)	K13424	NA	probable WRKY transcription factor 48, partial [Sesamum indicum];hypothetical protein CDL12_08102 [Handroanthus impetiginosus]	NA	1.67154	1.95239	1.50899	0.878324	0.0754048	0.884771	2.7919	1.48125	0.0109511	0.0494905	up	yes
	Am04g42290	MYB	Am04g42290.T01	GO:0000981(RNA polymerase II transcription factor activity, sequence-specific DNA binding);GO:0001135(transcription factor activity, RNA polymerase II transcription factor recruiting);GO:0003677(DNA binding);GO:0003700(DNA binding transcription factor activity);GO:0005515(protein binding);GO:0005634(nucleus);GO:0006351(transcription, DNA-templated);GO:0006355(regulation of transcription, DNA-temp…	NA	NA	NA	MYB-related transcription factor [Salvia miltiorrhiza]	NA	1.52063	1.85417	1.09024	0.631157	0.178966	0.455793	3.52713	1.81849	0.000544527	0.00451607	up	yes
	Am04g42930	AP2/ERF-ERF	Am04g42930.T01	GO:0003677(DNA binding);GO:0003700(DNA binding transcription factor activity);GO:0005622(intracellular);GO:0005634(nucleus);GO:0006351(transcription, DNA-templated);GO:0006355(regulation of transcription, DNA-templated);GO:0006952(defense response);GO:0009867(jasmonic acid mediated signaling pathway);GO:0009873(ethylene-activated signaling pathway)	04016(MAPK signaling pathway - plant);04075(Plant hormone signal transduction)	K14516	NA	hypothetical protein CDL12_17260 [Handroanthus impetiginosus]	NA	39.4521	42.0773	39.4601	8.23967	8.55074	7.16261	5.05112	2.3366	1.87591e-24	5.05947e-22	up	yes
	Am05g02290	MYB-related	Am05g02290.T01	GO:0003677(DNA binding);GO:0003700(DNA binding transcription factor activity);GO:0005634(nucleus);GO:0006351(transcription, DNA-templated);GO:0006355(regulation of transcription, DNA-templated)	NA	NA	NA	protein RADIALIS-like 3 [Sesamum indicum]	NA	2.30522	2.10425	2.27106	12.6722	9.55533	9.87014	0.208132	-2.26443	4.71503e-13	3.38212e-11	down	yes
	Am05g02830	DBB	Am05g02830.T01	GO:0005634(nucleus);GO:0006355(regulation of transcription, DNA-templated);GO:0009640(photomorphogenesis)	NA	NA	NA	hypothetical protein CDL12_22496 [Handroanthus impetiginosus]	NA	0.800007	0.518748	0.49753	1.91541	1.38181	1.89922	0.349526	-1.51653	0.00041924	0.00363809	down	yes
	Am05g03850	bZIP	Am05g03850.T01	GO:0000977(RNA polymerase II regulatory region sequence-specific DNA binding);GO:0001228(transcriptional activator activity, RNA polymerase II transcription regulatory region sequence-specific DNA binding);GO:0003677(DNA binding);GO:0003700(DNA binding transcription factor activity);GO:0005634(nucleus);GO:0006351(transcription, DNA-templated);GO:0006355(regulation of transcription, DNA-templated)…	04075(Plant hormone signal transduction)	K14432	NA	PREDICTED: protein FD-like [Juglans regia]	NA	11.2404	10.4268	8.31134	37.8801	37.2806	33.7393	0.275285	-1.861	1.17582e-15	1.2997e-13	down	yes
	Am05g04730	AP2/ERF-ERF	Am05g04730.T01	GO:0003677(DNA binding);GO:0003700(DNA binding transcription factor activity);GO:0005634(nucleus);GO:0006351(transcription, DNA-templated);GO:0006355(regulation of transcription, DNA-templated);GO:0009873(ethylene-activated signaling pathway);GO:0045893(positive regulation of transcription, DNA-templated);GO:0048510(regulation of timing of transition from vegetative to reproductive phase)	03040(Spliceosome)	K12900	NA	hypothetical protein CDL12_17238 [Handroanthus impetiginosus]	NA	6.08793	6.74345	6.02921	2.06257	1.78132	2.07637	3.18578	1.67164	2.06617e-11	1.13572e-09	up	yes
	Am05g08790	SBP	Am05g08790.T01	GO:0003677(DNA binding);GO:0003700(DNA binding transcription factor activity);GO:0005634(nucleus);GO:0005737(cytoplasm);GO:0006351(transcription, DNA-templated);GO:0006355(regulation of transcription, DNA-templated);GO:0010228(vegetative to reproductive phase transition of meristem);GO:0046872(metal ion binding);GO:0048366(leaf development);GO:0048653(anther development);GO:2000025(regulation of …	NA	NA	NA	squamosa promoter binding protein-homologue 5, partial [Antirrhinum majus]	NA	0.363961	0.035169	0.339652	0.771584	0.92066	0.700547	0.308753	-1.69547	0.00946641	0.0442948	down	yes
	Am05g09530	MADS-MIKC	Am05g09530.T01	GO:0000977(RNA polymerase II regulatory region sequence-specific DNA binding);GO:0003700(DNA binding transcription factor activity);GO:0005515(protein binding);GO:0005634(nucleus);GO:0006351(transcription, DNA-templated);GO:0009908(flower development);GO:0010228(vegetative to reproductive phase transition of meristem);GO:0040008(regulation of growth);GO:0044212(transcription regulatory region DNA…	NA	NA	NA	agamous-like MADS-box protein AGL12 isoform X1 [Sesamum indicum]	NA	3.07641	2.28582	3.68305	0.781429	0.928645	1.27459	3.03059	1.5996	8.19123e-05	0.000939298	up	yes
	Am05g12980	NAC	Am05g12980.T01	GO:0003677(DNA binding);GO:0003700(DNA binding transcription factor activity);GO:0005634(nucleus);GO:0006351(transcription, DNA-templated);GO:0006355(regulation of transcription, DNA-templated);GO:0007275(multicellular organism development);GO:0009793(embryo development ending in seed dormancy);GO:0009825(multidimensional cell growth);GO:0009835(fruit ripening);GO:0009908(flower development);GO:0…	NA	NA	NA	LOW QUALITY PROTEIN: NAC transcription factor 29 [Sesamum indicum]	NA	6.59198	5.85859	5.02658	3.12476	1.72256	2.52249	2.37145	1.24577	7.94619e-05	0.000915872	up	yes
	Am05g23640	MYB	Am05g23640.T03;Am05g23640.T02;Am05g23640.T01	GO:0000981(RNA polymerase II transcription factor activity, sequence-specific DNA binding);GO:0001135(transcription factor activity, RNA polymerase II transcription factor recruiting);GO:0003677(DNA binding);GO:0003700(DNA binding transcription factor activity);GO:0005634(nucleus);GO:0006351(transcription, DNA-templated);GO:0006355(regulation of transcription, DNA-templated);GO:0006357(regulation…	NA	NA	NA	transcription factor MYB62 [Sesamum indicum]	NA	19.5454	14.7655	19.218	6.12152	6.5859	6.55645	2.77872	1.47442	5.94224e-11	2.95331e-09	up	yes
	Am05g44690	bHLH	Am05g44690.T01	GO:0003677(DNA binding);GO:0003700(DNA binding transcription factor activity);GO:0005515(protein binding);GO:0005634(nucleus);GO:0006351(transcription, DNA-templated);GO:0006355(regulation of transcription, DNA-templated);GO:0009637(response to blue light);GO:0009908(flower development);GO:0009911(positive regulation of flower development);GO:0046983(protein dimerization activity)	NA	NA	NA	transcription factor bHLH63 isoform X2 [Sesamum indicum]	NA	12.0044	11.0273	11.2972	29.4903	26.8519	28.7944	0.403221	-1.31036	5.8261e-10	2.44212e-08	down	yes
	Am05g44700	MYB-related	Am05g44700.T01	GO:0003677(DNA binding);GO:0003700(DNA binding transcription factor activity);GO:0005634(nucleus);GO:0006355(regulation of transcription, DNA-templated)	NA	NA	NA	hypothetical protein CDL12_15204 [Handroanthus impetiginosus]	NA	8.12569	11.8711	10.3308	38.8344	38.5839	35.1754	0.269353	-1.89243	4.93674e-15	4.91923e-13	down	yes
	Am05g46080	bZIP	Am05g46080.T02;Am05g46080.T01	GO:0000976(transcription regulatory region sequence-specific DNA binding);GO:0000977(RNA polymerase II regulatory region sequence-specific DNA binding);GO:0003677(DNA binding);GO:0003700(DNA binding transcription factor activity);GO:0005515(protein binding);GO:0005634(nucleus);GO:0006351(transcription, DNA-templated);GO:0006355(regulation of transcription, DNA-templated);GO:0009414(response to wa…	04075(Plant hormone signal transduction);04075(Plant hormone signal transduction)	K14432	NA	ABA-responsive element (ABRE)-binding transcription factor1 [Salvia miltiorrhiza]	NA	2.95848	3.20688	2.19145	25.965	30.0845	25.4927	0.102484	-3.28652	5.74867e-42	5.05583e-39	down	yes
	Am06g01240	GeBP	Am06g01240.T01	GO:0005515(protein binding);GO:0005634(nucleus);GO:0005730(nucleolus);GO:0006351(transcription, DNA-templated);GO:0006355(regulation of transcription, DNA-templated)	NA	NA	NA	probable transcription factor At4g00390 [Sesamum indicum]	NA	5.85069	6.53688	6.62459	2.66369	3.12463	3.4439	2.05933	1.04217	0.00334633	0.0195804	up	yes
	Am06g04830	C2H2	Am06g04830.T01	GO:0003676(nucleic acid binding);GO:0003700(DNA binding transcription factor activity);GO:0005634(nucleus);GO:0006355(regulation of transcription, DNA-templated);GO:0008270(zinc ion binding);GO:0009738(abscisic acid-activated signaling pathway);GO:0009788(negative regulation of abscisic acid-activated signaling pathway);GO:0019760(glucosinolate metabolic process);GO:0043565(sequence-specific DNA …	NA	NA	NA	zinc finger protein 4 [Sesamum indicum]	NA	6.89387	6.58378	7.28705	13.9421	14.1064	13.6778	0.497641	-1.00682	1.24046e-05	0.000186419	down	yes
	Am06g09600	WRKY	Am06g09600.T01;Am06g09600.T02	GO:0009737(response to abscisic acid);GO:0009737(response to abscisic acid)	04626(Plant-pathogen interaction);04626(Plant-pathogen interaction)	K16225	NA	probable WRKY transcription factor 41 [Sesamum indicum];hypothetical protein CDL12_00717 [Handroanthus impetiginosus]	NA	15.6394	15.3674	16.9451	5.02914	6.28618	4.30354	3.07013	1.6183	2.94479e-12	1.83849e-10	up	yes
	Am06g13630	WRKY	Am06g13630.T01	GO:0000122(negative regulation of transcription by RNA polymerase II);GO:0000978(RNA polymerase II proximal promoter sequence-specific DNA binding);GO:0003700(DNA binding transcription factor activity);GO:0005634(nucleus);GO:0006351(transcription, DNA-templated);GO:0006355(regulation of transcription, DNA-templated);GO:0010055(atrichoblast differentiation);GO:0032107(regulation of response to nut…	04626(Plant-pathogen interaction)	K18835	NA	probable WRKY transcription factor 75 [Coffea arabica]	NA	32.194	38.8653	34.0569	12.2772	10.2344	8.56809	3.38215	1.75794	1.28227e-13	1.01717e-11	up	yes
	Am06g13850	CAMTA	Am06g13850.T03;Am06g13850.T02;Am06g13850.T01	GO:0005634(nucleus);GO:0043565(sequence-specific DNA binding);GO:0045944(positive regulation of transcription by RNA polymerase II);GO:0045944(positive regulation of transcription by RNA polymerase II)	NA	NA	NA	calmodulin-binding transcription activator 4 [Sesamum indicum]	NA	7.23646	8.15159	9.65968	3.75035	2.9446	3.9763	2.34722	1.23095	1.06498e-07	2.80135e-06	up	yes
	Am06g16510	HB-other	Am06g16510.T02;Am06g16510.T03;Am06g16510.T01	GO:0003700(DNA binding transcription factor activity);GO:0005515(protein binding);GO:0005634(nucleus);GO:0006355(regulation of transcription, DNA-templated);GO:0009723(response to ethylene);GO:0009736(cytokinin-activated signaling pathway);GO:0010094(specification of carpel identity);GO:0043565(sequence-specific DNA binding);GO:0043565(sequence-specific DNA binding)	NA	NA	NA	homeobox protein knotted-1-like 6 isoform X1 [Sesamum indicum];Transcription factor MEIS1 [Handroanthus impetiginosus]	NA	1.75497	2.12545	1.00803	0.242204	0.149489	0.277034	7.31007	2.86989	2.09259e-08	6.40377e-07	up	yes
	Am06g22080	Tify	Am06g22080.T01	GO:0003714(transcription corepressor activity);GO:0005634(nucleus);GO:0009611(response to wounding);GO:0031347(regulation of defense response);GO:1903507(negative regulation of nucleic acid-templated transcription);GO:2000022(regulation of jasmonic acid mediated signaling pathway)	04075(Plant hormone signal transduction)	K13464	NA	protein TIFY 6B [Sesamum indicum]	NA	4.9586	5.49702	5.16046	2.81346	2.57565	2.2028	2.05694	1.0405	8.62488e-05	0.000980135	up	yes
	Am06g23740	C2C2-Dof	Am06g23740.T01	GO:0003677(DNA binding);GO:0003700(DNA binding transcription factor activity);GO:0005634(nucleus);GO:0006351(transcription, DNA-templated);GO:0006355(regulation of transcription, DNA-templated);GO:0044212(transcription regulatory region DNA binding);GO:0046872(metal ion binding);GO:0048364(root development)	NA	NA	NA	dof zinc finger protein DOF5.6 [Rosa chinensis]	NA	4.63933	3.18983	2.3921	1.50621	1.86366	1.59004	2.06078	1.04319	0.00328351	0.0192798	up	yes
	Am06g27560	GRAS	Am06g27560.T01	GO:0003700(DNA binding transcription factor activity);GO:0005634(nucleus);GO:0006355(regulation of transcription, DNA-templated);GO:0043565(sequence-specific DNA binding)	04075(Plant hormone signal transduction)	K14494	NA	scarecrow-like protein 30 [Sesamum indicum]	NA	1.50589	1.07954	1.44266	0.400333	0.49971	0.43461	3.01808	1.59363	2.88205e-05	0.000384806	up	yes
	Am06g29100	NAC	Am06g29100.T01	GO:0003700(DNA binding transcription factor activity);GO:0005634(nucleus);GO:0007275(multicellular organism development);GO:0009965(leaf morphogenesis);GO:0010200(response to chitin);GO:0045792(negative regulation of cell size);GO:0048281(inflorescence morphogenesis)	NA	NA	NA	NAC domain-containing protein 96-like protein [Cinnamomum micranthum f. kanehirae]	NA	0.605229	0.60885	1.10287	1.61412	2.45492	2.44785	0.35553	-1.49196	0.00258515	0.0160406	down	yes
	Am06g29720	NAC	Am06g29720.T01;Am06g29720.T02	GO:0003677(DNA binding);GO:0003700(DNA binding transcription factor activity);GO:0005634(nucleus);GO:0006351(transcription, DNA-templated);GO:0006355(regulation of transcription, DNA-templated);GO:0007275(multicellular organism development);GO:0007275(multicellular organism development)	NA	NA	NA	NAC domain-containing protein 82-like isoform X1 [Sesamum indicum]	NA	7.77731	7.4904	7.67931	3.31219	3.431	3.51017	2.238	1.16221	5.87256e-08	1.65446e-06	up	yes
	Am06g31000	MYB	Am06g31000.T01	GO:0000981(RNA polymerase II transcription factor activity, sequence-specific DNA binding);GO:0001135(transcription factor activity, RNA polymerase II transcription factor recruiting);GO:0003677(DNA binding);GO:0003700(DNA binding transcription factor activity);GO:0005515(protein binding);GO:0005634(nucleus);GO:0006351(transcription, DNA-templated);GO:0006355(regulation of transcription, DNA-temp…	NA	NA	NA	PREDICTED: myb-related protein 308-like [Ipomoea nil]	NA	0.847258	1.05163	1.18358	0.163898	0.233169	0.611119	3.05744	1.61233	0.00558566	0.0293472	up	yes
	Am06g31140	OFP	Am06g31140.T01	GO:0005634(nucleus);GO:0005886(plasma membrane);GO:0006351(transcription, DNA-templated);GO:0045892(negative regulation of transcription, DNA-templated)	NA	NA	NA	transcription repressor OFP7-like [Sesamum indicum]	NA	2.43331	2.28951	1.60078	0.844693	1.04097	0.565984	2.57932	1.36699	0.000984905	0.00740895	up	yes
	Am06g31570	MYB-related	Am06g31570.T01	NA	NA	NA	NA		NA	5.14287	3.13567	5.29332	14.1894	15.8923	12.0897	0.321826	-1.63565	6.32356e-08	1.75946e-06	down	yes
	Am06g33660	C2C2-Dof	Am06g33660.T01	GO:0003677(DNA binding);GO:0003700(DNA binding transcription factor activity);GO:0005634(nucleus);GO:0006351(transcription, DNA-templated);GO:0006355(regulation of transcription, DNA-templated);GO:0043565(sequence-specific DNA binding);GO:0044212(transcription regulatory region DNA binding);GO:0046872(metal ion binding)	NA	NA	NA	PREDICTED: dof zinc finger protein DOF3.2-like [Erythranthe guttata]	NA	2.06876	1.91483	1.8117	0.950203	0.703518	1.00034	2.18356	1.12668	0.00016157	0.00164399	up	yes
	Am06g38810	bZIP	Am06g38810.T01	GO:0003677(DNA binding);GO:0003700(DNA binding transcription factor activity);GO:0005634(nucleus);GO:0006355(regulation of transcription, DNA-templated)	NA	NA	NA	bZIP transcription factor 2-like isoform X1 [Olea europaea var. sylvestris]	NA	6.09133	5.98024	5.01007	1.08345	0.938483	0.608525	6.49379	2.69906	9.52095e-15	9.21482e-13	up	yes
	Am06g38970	bHLH	Am06g38970.T01	GO:0005634(nucleus)	04016(MAPK signaling pathway - plant);04075(Plant hormone signal transduction)	K13422	NA	transcription factor bHLH18-like [Sesamum indicum]	NA	29.0865	29.3655	30.4518	14.3862	14.611	13.453	2.09431	1.06647	1.60968e-07	4.08027e-06	up	yes
	Am07g00880	NAC	Am07g00880.T01	GO:0003677(DNA binding);GO:0005634(nucleus);GO:0006351(transcription, DNA-templated);GO:0006355(regulation of transcription, DNA-templated)	NA	NA	NA	PREDICTED: NAC domain-containing protein 21/22 [Erythranthe guttata]	NA	5.09052	4.25696	3.69703	1.22343	1.67888	3.42057	2.06306	1.04479	0.00637927	0.0326063	up	yes
	Am07g02030	GRAS	Am07g02030.T01;Am07g02030.T02	GO:0003700(DNA binding transcription factor activity);GO:0005634(nucleus);GO:0006355(regulation of transcription, DNA-templated);GO:0043565(sequence-specific DNA binding);GO:0043565(sequence-specific DNA binding)	04075(Plant hormone signal transduction);04075(Plant hormone signal transduction)	K14494	NA	scarecrow-like protein 13 [Sesamum indicum]	NA	4.42614	4.23208	3.59799	2.47608	1.75789	1.78531	2.03616	1.02585	9.85303e-05	0.0010963	up	yes
	Am07g03810	WRKY	Am07g03810.T01	GO:0003700(DNA binding transcription factor activity);GO:0005515(protein binding);GO:0005634(nucleus);GO:0006351(transcription, DNA-templated);GO:0006355(regulation of transcription, DNA-templated);GO:0009873(ethylene-activated signaling pathway);GO:0010200(response to chitin);GO:0016036(cellular response to phosphate starvation);GO:0043565(sequence-specific DNA binding);GO:0044212(transcription …	00970(Aminoacyl-tRNA biosynthesis)	K01892	EC:6.1.1.21	WRKY transcription factor 6 [Sesamum indicum]	NA	3.54507	3.69317	4.97912	1.6108	2.20896	2.10225	2.06304	1.04477	0.000256128	0.00243924	up	yes
	Am07g05390	HSF	Am07g05390.T01	GO:0003677(DNA binding);GO:0003700(DNA binding transcription factor activity);GO:0005515(protein binding);GO:0005634(nucleus);GO:0005737(cytoplasm);GO:0006351(transcription, DNA-templated);GO:0006355(regulation of transcription, DNA-templated);GO:0009408(response to heat);GO:0043565(sequence-specific DNA binding)	NA	NA	NA	hypothetical protein CDL12_30093 [Handroanthus impetiginosus]	NA	3.11045	1.58164	2.85346	0.297207	0.404443	1.3422	3.69183	1.88434	0.00136201	0.00964326	up	yes
	Am07g06480	GRAS	Am07g06480.T01	GO:0003700(DNA binding transcription factor activity);GO:0005634(nucleus);GO:0006355(regulation of transcription, DNA-templated);GO:0043565(sequence-specific DNA binding)	NA	NA	NA	scarecrow-like transcription factor SCL8-L protein [Antirrhinum majus]	NA	7.69763	8.74421	8.54742	3.91323	3.4042	3.10621	2.39737	1.26145	4.72566e-08	1.35589e-06	up	yes
	Am07g10810	MYB-related	Am07g10810.T01	GO:0003677(DNA binding);GO:0003700(DNA binding transcription factor activity);GO:0005634(nucleus);GO:0006351(transcription, DNA-templated);GO:0006355(regulation of transcription, DNA-templated)	NA	NA	NA	myb-like protein RL4, partial [Antirrhinum majus]	NA	3.29941	2.85501	2.52172	7.12154	7.67026	7.42176	0.390578	-1.35632	5.4222e-06	9.09456e-05	down	yes
	Am07g11100	RWP-RK	Am07g11100.T01	GO:0003677(DNA binding);GO:0003700(DNA binding transcription factor activity);GO:0005634(nucleus);GO:0006351(transcription, DNA-templated);GO:0006355(regulation of transcription, DNA-templated)	NA	NA	NA	protein NLP9 [Sesamum indicum]	NA	0.212455	0.251316	0.113214	0.594254	0.620533	0.335729	0.372125	-1.42614	0.00496173	0.0266505	down	yes
	Am07g18530	AP2/ERF-ERF	Am07g18530.T01	GO:0003677(DNA binding);GO:0003700(DNA binding transcription factor activity);GO:0005515(protein binding);GO:0005634(nucleus);GO:0006351(transcription, DNA-templated);GO:0009409(response to cold);GO:0009414(response to water deprivation);GO:0009631(cold acclimation);GO:0045893(positive regulation of transcription, DNA-templated)	NA	NA	NA	CRT/DRE-binding factor 2 [Avicennia marina]	NA	2.57577	1.41442	1.88879	6.81402	6.22746	7.44707	0.28694	-1.80118	1.1033e-08	3.55943e-07	down	yes
	Am07g19030	AP2/ERF-ERF	Am07g19030.T01	GO:0000976(transcription regulatory region sequence-specific DNA binding);GO:0003677(DNA binding);GO:0003700(DNA binding transcription factor activity);GO:0005634(nucleus);GO:0006351(transcription, DNA-templated);GO:0006355(regulation of transcription, DNA-templated);GO:0009414(response to water deprivation);GO:0009873(ethylene-activated signaling pathway);GO:0019760(glucosinolate metabolic proce…	NA	NA	NA	ethylene-responsive transcription factor ERF107 [Sesamum indicum]	NA	1.33961	2.10508	1.6648	0.396535	0.545128	0.805752	2.92402	1.54796	0.0013015	0.00929291	up	yes
	Am07g21200	WRKY	Am07g21200.T01	GO:0003700(DNA binding transcription factor activity);GO:0005515(protein binding);GO:0005634(nucleus);GO:0006351(transcription, DNA-templated);GO:0006355(regulation of transcription, DNA-templated);GO:0009751(response to salicylic acid);GO:0009753(response to jasmonic acid);GO:0009862(systemic acquired resistance, salicylic acid mediated signaling pathway);GO:0009864(induced systemic resistance, …	04626(Plant-pathogen interaction)	K13459	NA	hypothetical protein CDL12_02441 [Handroanthus impetiginosus]	NA	31.3631	36.2886	34.9982	12.1014	11.0545	10.7637	3.02628	1.59755	1.05055e-13	8.43273e-12	up	yes
	Am07g30620	AP2/ERF-ERF	Am07g30620.T01	GO:0003677(DNA binding);GO:0003700(DNA binding transcription factor activity);GO:0005634(nucleus);GO:0006351(transcription, DNA-templated);GO:0006355(regulation of transcription, DNA-templated);GO:0009873(ethylene-activated signaling pathway)	NA	NA	NA	hypothetical protein CDL12_10579 [Handroanthus impetiginosus]	NA	0.694215	1.02317	1.20759	9.00782	7.54747	9.19307	0.113599	-3.13798	3.47526e-22	6.63185e-20	down	yes
	Am07g31840	MYB-related	Am07g31840.T01;Am07g31840.T02	GO:0003682(chromatin binding);GO:0003700(DNA binding transcription factor activity);GO:0003713(transcription coactivator activity);GO:0004402(histone acetyltransferase activity);GO:0005634(nucleus);GO:0006338(chromatin remodeling);GO:0006357(regulation of transcription by RNA polymerase II);GO:0035066(positive regulation of histone acetylation);GO:0035066(positive regulation of histone acetylatio…	NA	NA	NA	putative MYB transcription factor [Avicennia marina]	NA	0.644795	0.212217	0.38486	1.86584	3.24429	2.67973	0.159422	-2.64908	8.50237e-06	0.000134891	down	yes
	Am07g32090	C3H	Am07g32090.T01	GO:0003676(nucleic acid binding);GO:0003677(DNA binding);GO:0003700(DNA binding transcription factor activity);GO:0005634(nucleus);GO:0005886(plasma membrane);GO:0006355(regulation of transcription, DNA-templated);GO:0006979(response to oxidative stress);GO:0046872(metal ion binding)	NA	NA	NA	CCCH-type Zn-finger protein [Handroanthus impetiginosus]	NA	3.48051	3.13529	3.80642	6.42414	7.11895	7.31655	0.499636	-1.00105	0.000136847	0.001438	down	yes
	Am07g33470	GRF	Am07g33470.T01	GO:0005515(protein binding);GO:0005524(ATP binding);GO:0005634(nucleus);GO:0006351(transcription, DNA-templated);GO:0006355(regulation of transcription, DNA-templated);GO:0008285(negative regulation of cell proliferation);GO:0009624(response to nematode);GO:0043565(sequence-specific DNA binding);GO:0044212(transcription regulatory region DNA binding);GO:0048364(root development);GO:0048366(leaf d…	NA	NA	NA	growth-regulating factor 3-like isoform X1 [Olea europaea var. sylvestris]	NA	0.218274	0.202194	0.3921	0.803233	0.790301	0.461775	0.395351	-1.33879	0.0183998	0.0724812	down	yes
	Am07g35700	GRAS	Am07g35700.T01;Am07g35700.T02	GO:0003700(DNA binding transcription factor activity);GO:0005634(nucleus);GO:0006355(regulation of transcription, DNA-templated);GO:0043565(sequence-specific DNA binding);GO:0043565(sequence-specific DNA binding)	04075(Plant hormone signal transduction);04075(Plant hormone signal transduction)	K14494	NA	PREDICTED: scarecrow-like protein 9 [Erythranthe guttata];hypothetical protein CDL12_24441 [Handroanthus impetiginosus]	NA	0.446174	0.729794	0.322957	2.18245	1.8136	1.39874	0.277847	-1.84764	1.61989e-05	0.000234385	down	yes
	Am07g36670	Trihelix	Am07g36670.T01	GO:0003700(DNA binding transcription factor activity);GO:0005515(protein binding);GO:0005634(nucleus);GO:0005730(nucleolus);GO:0006351(transcription, DNA-templated);GO:0006355(regulation of transcription, DNA-templated);GO:0016592(mediator complex);GO:0043565(sequence-specific DNA binding)	NA	NA	NA	trihelix transcription factor GT-3b [Sesamum indicum]	NA	1.20534	2.54292	2.56445	0.778379	0.549012	1.10899	2.59102	1.37352	0.00292183	0.0176374	up	yes
	Am08g07470	bHLH	Am08g07470.T01	GO:0003677(DNA binding);GO:0003700(DNA binding transcription factor activity);GO:0005634(nucleus);GO:0006351(transcription, DNA-templated);GO:0006355(regulation of transcription, DNA-templated);GO:0046983(protein dimerization activity)	04016(MAPK signaling pathway - plant);04075(Plant hormone signal transduction)	K13422	NA	hypothetical protein CDL12_22950 [Handroanthus impetiginosus]	NA	1.65423	2.25677	1.72135	0.460747	1.03098	0.597967	2.6953	1.43044	0.00191135	0.0126308	up	yes
	Am08g17170	C2C2-Dof	Am08g17170.T01	GO:0003677(DNA binding);GO:0003700(DNA binding transcription factor activity);GO:0005634(nucleus);GO:0006351(transcription, DNA-templated);GO:0006355(regulation of transcription, DNA-templated);GO:0010052(guard cell differentiation);GO:0010118(stomatal movement);GO:0043565(sequence-specific DNA binding);GO:0045893(positive regulation of transcription, DNA-templated);GO:0046872(metal ion binding);…	NA	NA	NA	hypothetical protein CDL12_06561 [Handroanthus impetiginosus]	NA	2.10103	1.08926	2.40778	0.684292	0.934687	0.78599	2.32771	1.21891	0.00840889	0.0403356	up	yes
	Am08g22410	bZIP	Am08g22410.T01	GO:0003677(DNA binding);GO:0003700(DNA binding transcription factor activity);GO:0005634(nucleus);GO:0006355(regulation of transcription, DNA-templated)	NA	NA	NA	basic leucine zipper 43-like [Quercus suber]	NA	12.6457	13.3742	15.6072	3.42873	5.55406	3.21192	3.41354	1.77127	2.71429e-08	8.15819e-07	up	yes
	Am08g23040	B3	Am08g23040.T01	NA	NA	NA	NA	B3 domain-containing protein At1g49475-like [Sesamum indicum]	NA	0.580541	1.03958	1.67473	0.175201	0.0001	0.427776	5.4634	2.4498	0.00161414	0.0110681	up	yes
	Am08g23640	GARP-G2-like	Am08g23640.T01	GO:0003677(DNA binding);GO:0003700(DNA binding transcription factor activity);GO:0005634(nucleus);GO:0005829(cytosol);GO:0006355(regulation of transcription, DNA-templated);GO:0010629(negative regulation of gene expression);GO:0044212(transcription regulatory region DNA binding);GO:0048449(floral organ formation);GO:0090701(specification of plant organ identity)	04075(Plant hormone signal transduction)	K14491	NA	myb family transcription factor EFM isoform X1 [Sesamum indicum]	NA	11.1592	7.6127	6.91107	4.15697	4.7718	3.83918	2.01152	1.00829	0.000274755	0.0025838	up	yes
	Am08g30590	B3-ARF	Am08g30590.T04;Am08g30590.T03;Am08g30590.T01;Am08g30590.T02;Am08g30590.T05	GO:0003677(DNA binding);GO:0003700(DNA binding transcription factor activity);GO:0005515(protein binding);GO:0005634(nucleus);GO:0006351(transcription, DNA-templated);GO:0006355(regulation of transcription, DNA-templated);GO:0009723(response to ethylene);GO:0009733(response to auxin);GO:0009734(auxin-activated signaling pathway);GO:0010311(lateral root formation);GO:0043565(sequence-specific DNA …	04075(Plant hormone signal transduction);04075(Plant hormone signal transduction)	K14486	NA	Auxin response factor 16 [Zea mays];auxin response factor 19 isoform X1 [Sesamum indicum];hypothetical protein CUMW_030420 [Citrus unshiu]	NA	2.53265	3.13804	3.07709	0.939962	1.67696	1.47578	2.13741	1.09586	5.51492e-05	0.000676505	up	yes
	Am08g30610	AP2/ERF-ERF	Am08g30610.T01	GO:0003677(DNA binding);GO:0003700(DNA binding transcription factor activity);GO:0005634(nucleus);GO:0006351(transcription, DNA-templated);GO:0006355(regulation of transcription, DNA-templated);GO:0009873(ethylene-activated signaling pathway)	NA	NA	NA	hypothetical protein CDL12_10579 [Handroanthus impetiginosus]	NA	0.489742	0.244455	0.971958	6.05055	8.1973	6.77876	0.0811427	-3.6234	3.04286e-17	4.04941e-15	down	yes
	Am08g31680	bHLH	Am08g31680.T01;Am08g31680.T02	GO:0003677(DNA binding);GO:0003700(DNA binding transcription factor activity);GO:0005634(nucleus);GO:0006351(transcription, DNA-templated);GO:0006355(regulation of transcription, DNA-templated);GO:0010200(response to chitin);GO:0046983(protein dimerization activity);GO:0046983(protein dimerization activity)	04016(MAPK signaling pathway - plant);04075(Plant hormone signal transduction);04075(Plant hormone signal transduction)	K13422	NA	putative transcription factor bHLH041 [Sesamum indicum]	NA	7.46855	8.35942	8.65345	2.5811	2.59667	2.00771	3.40707	1.76853	8.24946e-12	4.80893e-10	up	yes
	Am08g31930	MYB-related	Am08g31930.T01	GO:0003682(chromatin binding);GO:0003700(DNA binding transcription factor activity);GO:0003713(transcription coactivator activity);GO:0004402(histone acetyltransferase activity);GO:0005634(nucleus);GO:0006338(chromatin remodeling);GO:0006357(regulation of transcription by RNA polymerase II);GO:0035066(positive regulation of histone acetylation)	NA	NA	NA	putative MYB transcription factor [Avicennia marina]	NA	7.59768	4.39836	5.05022	10.9588	13.0832	10.3031	0.496323	-1.01065	0.000571546	0.00470351	down	yes
	Am08g32270	C3H	Am08g32270.T01	GO:0003676(nucleic acid binding);GO:0003677(DNA binding);GO:0003700(DNA binding transcription factor activity);GO:0005634(nucleus);GO:0005886(plasma membrane);GO:0006355(regulation of transcription, DNA-templated);GO:0006979(response to oxidative stress);GO:0046872(metal ion binding)	NA	NA	NA	CCCH-type Zn-finger protein [Handroanthus impetiginosus]	NA	11.6422	9.70409	11.0395	23.9524	25.4599	22.385	0.451073	-1.14857	1.12137e-07	2.92576e-06	down	yes
	Am08g32760	AP2/ERF-ERF	Am08g32760.T01	GO:0003677(DNA binding);GO:0003700(DNA binding transcription factor activity);GO:0005634(nucleus);GO:0006351(transcription, DNA-templated);GO:0006355(regulation of transcription, DNA-templated);GO:0009873(ethylene-activated signaling pathway);GO:0043565(sequence-specific DNA binding);GO:0045893(positive regulation of transcription, DNA-templated)	NA	NA	NA	hypothetical protein CDL12_13712 [Handroanthus impetiginosus]	NA	2.63167	1.23012	1.61914	4.92232	4.48817	4.83889	0.384644	-1.37841	0.000162739	0.00165421	down	yes
	Am08g37510	WRKY	Am08g37510.T01;Am08g37510.T02	GO:0003700(DNA binding transcription factor activity);GO:0005515(protein binding);GO:0005634(nucleus);GO:0006351(transcription, DNA-templated);GO:0006355(regulation of transcription, DNA-templated);GO:0009751(response to salicylic acid);GO:0009753(response to jasmonic acid);GO:0009862(systemic acquired resistance, salicylic acid mediated signaling pathway);GO:0009864(induced systemic resistance, …	04626(Plant-pathogen interaction);04626(Plant-pathogen interaction)	K13459	NA	probable WRKY transcription factor 70 [Herrania umbratica];hypothetical protein CDL12_05914 [Handroanthus impetiginosus]	NA	12.039	12.4501	13.6745	3.998	2.98645	3.09127	3.78768	1.92131	2.05831e-16	2.50816e-14	up	yes

## Sheet: Table S5
Table S5 Statistics of KEGG pathway
	KEGG_ID	Pathway_Name	S_Gene_Number	TS_Gene_Number	B_Gene_Number	TB_Gene_Number	p_Value	RichFactor
NTNL vs NTNLI	ko00909	Sesquiterpenoid and triterpenoid biosynthesis	11	458	74	10723	0.000280163	0.148649
	ko04075	Plant hormone signal transduction	45	458	626	10723	0.000390936	0.071885
	ko00901	Indole alkaloid biosynthesis	11	458	98	10723	0.0030003	0.112245
	ko00564	Glycerophospholipid metabolism	14	458	158	10723	0.00767793	0.0886076
	ko00510	N-Glycan biosynthesis	9	458	83	10723	0.00872265	0.108434
	ko00565	Ether lipid metabolism	9	458	89	10723	0.0134951	0.101124
	ko04016	MAPK signaling pathway - plant	30	458	481	10723	0.0238546	0.0623701
	ko00561	Glycerolipid metabolism	12	458	156	10723	0.0350259	0.0769231
	ko00592	alpha-Linolenic acid metabolism	7	458	73	10723	0.0357657	0.0958904
	ko00196	Photosynthesis - antenna proteins	4	458	30	10723	0.0373802	0.133333
	ko00590	Arachidonic acid metabolism	4	458	36	10723	0.065943	0.111111
	ko04626	Plant-pathogen interaction	40	458	744	10723	0.0766733	0.0537634
	ko00062	Fatty acid elongation	5	458	56	10723	0.0899049	0.0892857
	ko00950	Isoquinoline alkaloid biosynthesis	5	458	57	10723	0.0952878	0.0877193
	ko00940	Phenylpropanoid biosynthesis	28	458	510	10723	0.102669	0.054902
	ko00591	Linoleic acid metabolism	2	458	15	10723	0.132613	0.133333
	ko00944	Flavone and flavonol biosynthesis	2	458	15	10723	0.132613	0.133333
	ko04712	Circadian rhythm - plant	8	458	124	10723	0.160533	0.0645161
	ko00500	Starch and sucrose metabolism	26	458	496	10723	0.162651	0.0524194
	ko00460	Cyanoamino acid metabolism	11	458	190	10723	0.189693	0.0578947
LT vs LTI	ko00901	Indole alkaloid biosynthesis	14	538	98	10723	0.000360052	0.142857
	ko00561	Glycerolipid metabolism	17	538	156	10723	0.00210052	0.108974
	ko00941	Flavonoid biosynthesis	16	538	156	10723	0.00511214	0.102564
	ko00910	Nitrogen metabolism	8	538	56	10723	0.006457	0.142857
	ko00073	Cutin, suberine and wax biosynthesis	13	538	125	10723	0.00985209	0.104
	ko00564	Glycerophospholipid metabolism	15	538	158	10723	0.0130226	0.0949367
	ko01040	Biosynthesis of unsaturated fatty acids	11	538	102	10723	0.013083	0.107843
	ko00565	Ether lipid metabolism	10	538	89	10723	0.0134204	0.11236
	ko00440	Phosphonate and phosphinate metabolism	4	538	20	10723	0.0159836	0.2
	ko00950	Isoquinoline alkaloid biosynthesis	7	538	57	10723	0.0231549	0.122807
	ko00940	Phenylpropanoid biosynthesis	36	538	510	10723	0.0236694	0.0705882
	ko00740	Riboflavin metabolism	5	538	34	10723	0.0260393	0.147059
	ko00480	Glutathione metabolism	13	538	146	10723	0.0317498	0.0890411
	ko00500	Starch and sucrose metabolism	33	538	496	10723	0.0587381	0.0665323
	ko00942	Anthocyanin biosynthesis	3	538	19	10723	0.0669348	0.157895
	ko00906	Carotenoid biosynthesis	8	538	87	10723	0.0699165	0.091954
	ko00970	Aminoacyl-tRNA biosynthesis	11	538	133	10723	0.070484	0.0827068
	ko00350	Tyrosine metabolism	8	538	88	10723	0.0737151	0.0909091
	ko00965	Betalain biosynthesis	4	538	32	10723	0.074255	0.125
	ko00750	Vitamin B6 metabolism	3	538	20	10723	0.0759262	0.15
WL vs WLI	ko00196	Photosynthesis - antenna proteins	8	385	30	10723	7.5053e-06	0.266667
	ko00402	Benzoxazinoid biosynthesis	4	385	13	10723	0.000903887	0.307692
	ko00020	Citrate cycle (TCA cycle)	10	385	115	10723	0.00829288	0.0869565
	ko00901	Indole alkaloid biosynthesis	9	385	98	10723	0.00851108	0.0918367
	ko00592	alpha-Linolenic acid metabolism	7	385	73	10723	0.0155245	0.0958904
	ko00945	Stilbenoid, diarylheptanoid and gingerol biosynthesis	9	385	116	10723	0.023602	0.0775862
	ko00941	Flavonoid biosynthesis	11	385	156	10723	0.0248736	0.0705128
	ko00630	Glyoxylate and dicarboxylate metabolism	10	385	139	10723	0.0280022	0.0719424
	ko04141	Protein processing in endoplasmic reticulum	26	385	494	10723	0.0324854	0.0526316
	ko00710	Carbon fixation in photosynthetic organisms	10	385	149	10723	0.0420881	0.0671141
	ko00908	Zeatin biosynthesis	4	385	42	10723	0.0628048	0.0952381
	ko00940	Phenylpropanoid biosynthesis	25	385	510	10723	0.0703354	0.0490196
	ko01053	Biosynthesis of siderophore group nonribosomal peptides	1	385	2	10723	0.0705224	0.5
	ko04120	Ubiquitin mediated proteolysis	19	385	372	10723	0.0774781	0.0510753
	ko00195	Photosynthesis	6	385	84	10723	0.0810285	0.0714286
	ko00563	Glycosylphosphatidylinositol(GPI)-anchor biosynthesis	3	385	30	10723	0.0913688	0.1
	ko00561	Glycerolipid metabolism	9	385	156	10723	0.108934	0.0576923
	ko00270	Cysteine and methionine metabolism	11	385	204	10723	0.117082	0.0539216
	ko00620	Pyruvate metabolism	9	385	165	10723	0.139538	0.0545455
	ko00910	Nitrogen metabolism	4	385	56	10723	0.140981	0.0714286
LTWL vs LTWLI	ko00196	Photosynthesis - antenna proteins	21	773	30	10723	6.1496e-18	0.7
	ko00195	Photosynthesis	23	773	84	10723	1.44801e-08	0.27381
	ko00901	Indole alkaloid biosynthesis	22	773	98	10723	1.29483e-06	0.22449
	ko01040	Biosynthesis of unsaturated fatty acids	22	773	102	10723	2.63984e-06	0.215686
	ko04626	Plant-pathogen interaction	84	773	744	10723	1.87701e-05	0.112903
	ko04016	MAPK signaling pathway - plant	59	773	481	10723	3.44685e-05	0.122661
	ko00190	Oxidative phosphorylation	26	773	200	10723	0.00239715	0.13
	ko00480	Glutathione metabolism	20	773	146	10723	0.0040107	0.136986
	ko00941	Flavonoid biosynthesis	20	773	156	10723	0.00840009	0.128205
	ko00900	Terpenoid backbone biosynthesis	11	773	69	10723	0.00989334	0.15942
	ko00260	Glycine, serine and threonine metabolism	13	773	91	10723	0.0131564	0.142857
	ko00950	Isoquinoline alkaloid biosynthesis	9	773	57	10723	0.0198614	0.157895
	ko00940	Phenylpropanoid biosynthesis	49	773	510	10723	0.0230017	0.0960784
	ko00565	Ether lipid metabolism	12	773	89	10723	0.0255122	0.134831
	ko00860	Porphyrin and chlorophyll metabolism	10	773	70	10723	0.0276981	0.142857
	ko00942	Anthocyanin biosynthesis	4	773	19	10723	0.0435407	0.210526
	ko00906	Carotenoid biosynthesis	11	773	87	10723	0.0474419	0.126437
	ko00350	Tyrosine metabolism	11	773	88	10723	0.0508541	0.125
	ko00750	Vitamin B6 metabolism	4	773	20	10723	0.0514288	0.2
	ko00945	Stilbenoid, diarylheptanoid and gingerol biosynthesis	13	773	116	10723	0.0740027	0.112069

## Sheet: Table S6
Table S6 Transcriptome expression data and statistics of DEG selected for qRT-PCR
	gene_id	gene_name	transcript_id	GO	KEGG	KO_ENTRY	EC	Description	trans_type	FPKM.LTI_1	FPKM.LTI_2	FPKM.LTI_3	FPKM.LT_1	FPKM.LT_2	FPKM.LT_3	fc	log2(fc)	log2(fc)-standard error	log2(qRT-PCR)	log2(qRT-PCR)-standard error	pval	qval	regulation	significant
LT vs LTI	Am03g25880	NAC92	Am03g25880.T01	GO:0003677(DNA binding);GO:0003700(DNA binding transcription factor activity);GO:0005634(nucleus);GO:0005737(cytoplasm);GO:0006351(transcription, DNA-templated);GO:0006355(regulation of transcription, DNA-templated);GO:0007275(multicellular organism development)	NA	NA	NA	NAC domain-containing protein 92 [Sesamum indicum]	NA	1.04606	1.22189	0.569543	2.91099	3.30632	2.76475	0.315907	-1.66243	0.388291	-2.12253	-0.424498	1.40006e-06	3.70905e-05	down	yes
	Am05g23820	Am05g23820	Am05g23820.T01	GO:0004674(protein serine/threonine kinase activity);GO:0005524(ATP binding);GO:0005576(extracellular region);GO:0005886(plasma membrane);GO:0006468(protein phosphorylation);GO:0007169(transmembrane receptor protein tyrosine kinase signaling pathway);GO:0016021(integral component of membrane);GO:0016301(kinase activity);GO:0016310(phosphorylation)	NA	NA	NA	Serine/threonine protein kinase [Handroanthus impetiginosus]	NA	0.098814	0.151916	0.155674	0.818496	0.735942	0.600533	0.188589	-2.40668	0.462157	-3.06526	-0.502134	5.63861e-08	2.09108e-06	down	yes
	Am07g17140	WRKY71	Am07g17140.T01	GO:0003700(DNA binding transcription factor activity);GO:0005634(nucleus);GO:0006351(transcription, DNA-templated);GO:0006355(regulation of transcription, DNA-templated);GO:0010228(vegetative to reproductive phase transition of meristem);GO:0045893(positive regulation of transcription, DNA-templated);GO:1990837(sequence-specific double-stranded DNA binding)	NA	NA	NA	probable WRKY transcription factor 71 [Olea europaea var. sylvestris]	NA	2.08757	2.06496	2.3759	15.9304	19.8051	17.2652	0.123176	-3.0212	0.174492	-5.11385	-0.591021	1.27247e-30	4.32706e-28	down	yes
	Am05g29810	HANT2.3	Am05g29810.T01	GO:0005886(plasma membrane);GO:0015112(nitrate transmembrane transporter activity);GO:0015706(nitrate transport)	00910(Nitrogen metabolism)	K02575	NA	high affinity nitrate transporter 2.3 [Sesamum indicum]	NA	0.872354	0.602741	0.86726	18.3041	17.08	17.0319	0.0446879	-4.48397	0.23019	-3.41622	-0.188211	3.02381e-62	4.04445e-59	down	yes
	Am07g06860	LTI65K	Am07g06860.T01	GO:0003674(molecular_function);GO:0005737(cytoplasm);GO:0006950(response to stress);GO:0009409(response to cold);GO:0009414(response to water deprivation);GO:0009651(response to salt stress);GO:0009737(response to abscisic acid);GO:0009738(abscisic acid-activated signaling pathway);GO:0010150(leaf senescence)	NA	NA	NA	low-temperature-induced 65 kDa protein-like isoform X1 [Olea europaea var. sylvestris]	NA	0.0001	0.107039	0.105821	0.61491	0.846682	0.699105	0.0985608	-3.34284	0.153317	-4.58219	-0.55	1.48712e-08	6.08902e-07	down	yes
	Am01g27990	ABAI5	Am01g27990.T01	GO:0003677(DNA binding);GO:0003700(DNA binding transcription factor activity);GO:0005515(protein binding);GO:0005634(nucleus);GO:0006351(transcription, DNA-templated);GO:0006355(regulation of transcription, DNA-templated);GO:0009414(response to water deprivation);GO:0009651(response to salt stress);GO:0009737(response to abscisic acid);GO:0009738(abscisic acid-activated signaling pathway);GO:0009…	04075(Plant hormone signal transduction)	K14432	NA	protein ABSCISIC ACID-INSENSITIVE 5 [Sesamum indicum]	NA	1.27539	1.20357	1.59641	0.184784	0.348488	0.0001	7.64076	2.93372	0.327095	1.35252	-0.063364	8.23237e-06	0.000174042	up	yes
	Am07g36540	Am07g36540	Am07g36540.T01	GO:0003333(amino acid transmembrane transport);GO:0005886(plasma membrane);GO:0015171(amino acid transmembrane transporter activity)	04075(Plant hormone signal transduction)	K13946	NA	auxin transporter-like protein 2 [Sesamum indicum]	NA	17.6572	15.5804	15.0204	7.0726	6.83052	8.22485	2.18086	1.1249	0.189551	2.59496	-0.0140859	4.52321e-07	1.36465e-05	up	yes
	Am01g34620	ORR9	Am01g34620.T01	GO:0000156(phosphorelay response regulator activity);GO:0000160(phosphorelay signal transduction system);GO:0005515(protein binding);GO:0005634(nucleus);GO:0006351(transcription, DNA-templated);GO:0006355(regulation of transcription, DNA-templated);GO:0007623(circadian rhythm);GO:0009735(response to cytokinin);GO:0009736(cytokinin-activated signaling pathway)	04075(Plant hormone signal transduction)	K14492	NA	two-component response regulator ORR9 [Sesamum indicum]	NA	6.63179	3.52274	5.06116	1.35415	1.83714	1.46187	3.26997	1.70928	0.358468	3.02552	-0.434561	1.62122e-06	4.21327e-05	up	yes
	Am04g25760	GATA	Am04g25760.T01	GO:0003700(DNA binding transcription factor activity);GO:0005515(protein binding);GO:0005634(nucleus);GO:0006355(regulation of transcription, DNA-templated);GO:0008270(zinc ion binding);GO:0016020(membrane)	04712(Circadian rhythm - plant)	K12135	NA	GATA-4/5/6 transcription factor [Handroanthus impetiginosus]	NA	13.5469	10.9768	12.5331	5.67285	4.81353	5.00113	2.39269	1.25863	0.055581	1.3838	-0.0656766	2.44022e-07	7.77115e-06	up	yes
	Am05g23310	PIN1a	Am05g23310.T01	GO:0005783(endoplasmic reticulum);GO:0005886(plasma membrane);GO:0009926(auxin polar transport);GO:0010252(auxin homeostasis);GO:0010329(auxin efflux transmembrane transporter activity)	NA	NA	NA	Auxin export transporter PIN1a [Antirrhinum majus]	NA	2.25964	3.51596	2.37213	1.32175	1.08564	1.15096	2.28975	1.19519	0.386936	1.92569	-0.424498	0.000176022	0.00252433	up	yes
WL vs WLI	Am01g27660	Am01g27660	Am01g27660.T01	GO:0004842(ubiquitin-protein transferase activity);GO:0019005(SCF ubiquitin ligase complex);GO:0031146(SCF-dependent proteasomal ubiquitin-dependent protein catabolic process)	NA	NA	NA	F-box protein At5g07610-like [Sesamum indicum]	NA	1.82879	2.33187	2.2524	4.93584	5.25017	5.18954	0.417095	-1.26155	0.116239	-0.778808	-0.0925407	3.83564e-05	0.00090211	down	yes
	Am07g18600	Am07g18600	Am07g18600.T01	GO:0003677(DNA binding);GO:0003700(DNA binding transcription factor activity);GO:0005515(protein binding);GO:0005634(nucleus);GO:0006351(transcription, DNA-templated);GO:0009409(response to cold);GO:0009414(response to water deprivation);GO:0009631(cold acclimation);GO:0045893(positive regulation of transcription, DNA-templated)	NA	NA	NA	CRT/DRE-binding factor 2 [Avicennia marina]	NA	3.79292	2.51372	2.82071	8.67821	8.25174	8.58224	0.357764	-1.48292	0.224182	-1.14922	-0.20771	8.41457e-07	3.37729e-05	down	yes
	Am01g56240	GA2-2	Am01g56240.T01	GO:0009416(response to light stimulus);GO:0045487(gibberellin catabolic process);GO:0052634(C-19 gibberellin 2-beta-dioxygenase activity)	00904(Diterpenoid biosynthesis)	K04125	EC:1.14.11.13	gibberellin 2 oxidase 2 [Camellia lipoensis]	NA	32.0277	34.4831	34.9218	11.9368	11.191	8.2092	3.23683	1.69458	0.278574	2.77523	-0.314504	5.7969e-17	1.49975e-14	up	yes
	Am04g27400	WRKY53	Am04g27400.T01	GO:0009737(response to abscisic acid)	04626(Plant-pathogen interaction)	K16225	NA	probable WRKY transcription factor 53 [Sesamum indicum]	NA	649.678	635.022	633.835	252.216	269.18	255.849	2.46838	1.30356	0.051886	2.66116	-0.0948523	8.49931e-14	1.45285e-11	up	yes
	Am06g35490	ATL46	Am06g35490.T01	GO:0043161(proteasome-mediated ubiquitin-dependent protein catabolic process);GO:0061630(ubiquitin protein ligase activity)	NA	NA	NA	RING-H2 finger protein ATL46-like [Sesamum indicum]	NA	6.67289	5.79422	6.19949	0.854762	0.53885	0.565877	9.52626	3.25191	0.224378	3.80051	-0.136727	1.77949e-24	7.57075e-22	up	yes
	Am05g46010	ERF109	Am05g46010.T01	GO:0003677(DNA binding);GO:0003700(DNA binding transcription factor activity);GO:0005634(nucleus);GO:0006351(transcription, DNA-templated);GO:0006355(regulation of transcription, DNA-templated);GO:0009873(ethylene-activated signaling pathway);GO:0010087(phloem or xylem histogenesis);GO:0010200(response to chitin);GO:0050832(defense response to fungus);GO:0051301(cell division)	03040(Spliceosome)	K12900	NA	ethylene-responsive transcription factor ERF109 [Sesamum indicum]	NA	43.5898	43.8858	43.8133	14.4399	11.8428	14.4947	3.21964	1.6869	0.138999	2.26887	-0.204333	3.52492e-19	1.07118e-16	up	yes
	Am04g12700	PIRCSXI	Am04g12700.T01	GO:0005515(protein binding);GO:0009507(chloroplast);GO:0009534(chloroplast thylakoid);GO:0009535(chloroplast thylakoid membrane);GO:0009538(photosystem I reaction center);GO:0009579(thylakoid);GO:0009941(chloroplast envelope);GO:0010287(plastoglobule);GO:0015979(photosynthesis);GO:0016020(membrane);GO:0016021(integral component of membrane);GO:0019684(photosynthesis, light reaction);GO:0031969(ch…	00195(Photosynthesis)	K02699	NA	photosystem I reaction center subunit XI, chloroplastic [Sesamum indicum]	NA	3461.59	3444.22	3413.65	1615.13	1684.55	1663.85	2.07906	1.05593	0.0309328	0.541506	-0.129372	1.19077e-09	9.04655e-08	up	yes
	Am08g04450	PRP4	Am08g04450.T01	GO:0005576(extracellular region);GO:0005618(cell wall)	NA	NA	NA	proline-rich protein 4-like [Sesamum indicum]	NA	32.8995	32.0015	38.5078	8.48816	10.0627	11.2801	3.46649	1.79348	0.118073	1.86344	-0.193392	1.21266e-20	3.86939e-18	up	yes
	Am01g50290	UPL	Am01g50290.T01	GO:0005634(nucleus);GO:0005737(cytoplasm)	NA	NA	NA	Ubiquitin--protein ligase [Handroanthus impetiginosus]	NA	19.5222	22.8116	22.7921	7.6458	7.94787	10.5089	2.495	1.31904	0.165765	1.87221	-0.191439	1.49863e-10	1.39957e-08	up	yes
LTWL vs LTWLI	Am02g53210	LEA	Am02g53210.T01;Am02g53210.T02	GO:0003674(molecular_function);GO:0005634(nucleus);GO:0005737(cytoplasm);GO:0005829(cytosol);GO:0009793(embryo development ending in seed dormancy);GO:0009793(embryo development ending in seed dormancy)	NA	NA	NA	late embryogenesis abundant protein D-34-like [Sesamum indicum];PREDICTED: late embryogenesis abundant protein D-34-like [Erythranthe guttata]	NA	12.2187	11.6608	11.8209	35.7305	39.5057	37.8704	0.315635	-1.66367	0.087512	-1.99553	-0.05564	9.38345e-17	1.20132e-14	down	yes
	Am06g04830	ZFP4	Am06g04830.T01	GO:0003676(nucleic acid binding);GO:0003700(DNA binding transcription factor activity);GO:0005634(nucleus);GO:0006355(regulation of transcription, DNA-templated);GO:0008270(zinc ion binding);GO:0009738(abscisic acid-activated signaling pathway);GO:0009788(negative regulation of abscisic acid-activated signaling pathway);GO:0019760(glucosinolate metabolic process);GO:0043565(sequence-specific DNA …	NA	NA	NA	zinc finger protein 4 [Sesamum indicum]	NA	6.89387	6.58378	7.28705	13.9421	14.1064	13.6778	0.497641	-1.00682	0.0781575	-0.462379	-0.0912849	1.24046e-05	0.000186419	down	yes
	Am04g01060	Am04g01060	Am04g01060.T01	GO:0003677(DNA binding);GO:0005516(calmodulin binding);GO:0005634(nucleus);GO:0006351(transcription, DNA-templated);GO:0006355(regulation of transcription, DNA-templated);GO:0006950(response to stress)	NA	NA	NA	calmodulin-binding protein 60 A-like isoform X1 [Sesamum indicum]	NA	6.4303	6.05892	5.53395	14.9426	13.1723	10.6022	0.46551	-1.10311	0.115498	-0.719797	-0.0912849	1.73644e-06	3.3548e-05	down	yes
	Am02g10450	SAUR71	Am02g10450.T01	GO:0003674(molecular_function);GO:0005737(cytoplasm);GO:0007275(multicellular organism development);GO:0009733(response to auxin);GO:0009734(auxin-activated signaling pathway);GO:0040008(regulation of growth)	04075(Plant hormone signal transduction)	K14488	NA	auxin-responsive protein SAUR71-like [Sesamum indicum]	NA	6.0154	6.72464	6.94619	15.6033	16.4454	12.6349	0.44057	-1.18256	0.224033	-1.29777	-0.223898	4.75886e-06	8.10289e-05	down	yes
	Am05g04080	Am05g04080	Am05g04080.T01	GO:0005507(copper ion binding);GO:0009055(electron transfer activity);GO:0009507(chloroplast);GO:0009535(chloroplast thylakoid membrane);GO:0009543(chloroplast thylakoid lumen);GO:0009579(thylakoid);GO:0031977(thylakoid lumen);GO:0046688(response to copper ion)	00195(Photosynthesis)	K02638	NA	plastocyanin [Sesamum indicum]	NA	41.758	37.7083	36.5078	101.751	105.516	106.527	0.369587	-1.43602	0.111106	-1.7377	-0.225892	3.7501e-14	3.25566e-12	down	yes
	Am03g21770	PPKS4	Am03g21770.T01	GO:0003674(molecular_function);GO:0005886(plasma membrane);GO:0009585(red, far-red light phototransduction);GO:0009638(phototropism);GO:0010017(red or far-red light signaling pathway)	NA	NA	NA	protein PHYTOCHROME KINASE SUBSTRATE 4 [Sesamum indicum]	NA	1.30739	1.55469	1.66331	3.85307	2.90177	2.67033	0.48014	-1.05847	0.172608	-2.26905	-0.05406	0.000435441	0.00374653	down	yes
	Am04g20970	RUP2	Am04g20970.T01	GO:0000166(nucleotide binding);GO:0005515(protein binding);GO:0005634(nucleus);GO:0005737(cytoplasm);GO:0005829(cytosol);GO:0005834(heterotrimeric G-protein complex);GO:0009658(chloroplast organization);GO:0009908(flower development);GO:0010224(response to UV-B);GO:0043496(regulation of protein homodimerization activity);GO:0080008(Cul4-RING E3 ubiquitin ligase complex)	04120(Ubiquitin mediated proteolysis);04712(Circadian rhythm - plant)	K10143	EC:2.3.2.27	WD repeat-containing protein RUP2 [Sesamum indicum]	NA	0.866088	1.14646	1.62805	3.13682	2.91679	4.34249	0.350189	-1.51379	0.225844	-1.86703	-0.0406377	6.09575e-05	0.000732214	down	yes
	Am05g44690	bHLH63	Am05g44690.T01	GO:0003677(DNA binding);GO:0003700(DNA binding transcription factor activity);GO:0005515(protein binding);GO:0005634(nucleus);GO:0006351(transcription, DNA-templated);GO:0006355(regulation of transcription, DNA-templated);GO:0009637(response to blue light);GO:0009908(flower development);GO:0009911(positive regulation of flower development);GO:0046983(protein dimerization activity)	NA	NA	NA	transcription factor bHLH63 isoform X2 [Sesamum indicum]	NA	12.0044	11.0273	11.2972	29.4903	26.8519	28.7944	0.403221	-1.31036	0.0285297	-2.22527	-0.166752	5.8261e-10	2.44212e-08	down	yes
	Am01g49290	CabBP21	Am01g49290.T01	GO:0009416(response to light stimulus);GO:0009535(chloroplast thylakoid membrane);GO:0009768(photosynthesis, light harvesting in photosystem I);GO:0009941(chloroplast envelope);GO:0010287(plastoglobule);GO:0016168(chlorophyll binding);GO:0031409(pigment binding)	00196(Photosynthesis - antenna proteins)	K08912	NA	chlorophyll a-b binding protein 21, chloroplastic-like [Sesamum indicum]	NA	239.809	245.462	252.605	584.038	554.067	565.096	0.433229	-1.2068	0.0549805	-1.85807	-0.0275159	2.15807e-12	1.36417e-10	down	yes
	Am05g06040	MEKK	Am05g06040.T01	GO:0005737(cytoplasm)	04016(MAPK signaling pathway - plant)	K20606	EC:2.7.11.25	MEKK [Handroanthus impetiginosus]	NA	14.3875	13.2952	16.0005	29.4487	46.6091	29.9442	0.412098	-1.27894	0.199915	-0.672415	-0.166752	4.55602e-07	1.02856e-05	down	yes
	Am04g08900	Peroxidase 72	Am04g08900.T01	GO:0004601(peroxidase activity);GO:0005576(extracellular region);GO:0006979(response to oxidative stress);GO:0009809(lignin biosynthetic process);GO:0020037(heme binding);GO:0042744(hydrogen peroxide catabolic process);GO:0046872(metal ion binding);GO:0055114(oxidation-reduction process)	00940(Phenylpropanoid biosynthesis)	K00430	EC:1.11.1.7	peroxidase 72 [Sesamum indicum]	NA	4.45297	5.4131	4.72171	1.44	1.596	1.5705	3.16678	1.66302	0.0742841	3.24551	-0.261104	7.19865e-08	1.98115e-06	up	yes
	Am05g03970	CDPK	Am05g03970.T01	GO:0004683(calmodulin-dependent protein kinase activity);GO:0005516(calmodulin binding);GO:0005634(nucleus);GO:0005737(cytoplasm);GO:0009738(abscisic acid-activated signaling pathway);GO:0009931(calcium-dependent protein serine/threonine kinase activity);GO:0018105(peptidyl-serine phosphorylation);GO:0035556(intracellular signal transduction);GO:0046777(protein autophosphorylation)	04626(Plant-pathogen interaction)	K13412	EC:2.7.11.1	calcium-dependent protein kinase 29 isoform X1 [Sesamum indicum]	NA	10.4651	9.77484	10.4518	4.79392	3.15752	4.97548	2.37425	1.24747	0.251671	2.74396	-0.245829	6.62554e-07	1.4288e-05	up	yes
	Am01g55050	CYP72A219	Am01g55050.T01	GO:0004497(monooxygenase activity)	NA	NA	NA	cytochrome P450 CYP72A219 [Sesamum indicum]	NA	1.93478	1.61114	1.85041	0.118072	0.075927	0.351871	9.88575	3.30535	0.174213	2.35614	-0.0480056	1.50444e-09	5.81869e-08	up	yes
	Am08g36350	LRRP	Am08g36350.T01	GO:0006952(defense response);GO:0007165(signal transduction);GO:0016020(membrane);GO:0016021(integral component of membrane)	NA	NA	NA	Leucine-rich repeat protein [Handroanthus impetiginosus]	NA	16.0824	15.4389	16.5428	6.65214	7.32917	7.2947	2.25908	1.17573	0.0812048	0.926603	-0.270533	2.02276e-09	7.59115e-08	up	yes
	Am06g33570	TPK-570	Am06g33570.T01	GO:0004672(protein kinase activity);GO:0004674(protein serine/threonine kinase activity);GO:0005515(protein binding);GO:0005524(ATP binding);GO:0005576(extracellular region);GO:0005886(plasma membrane);GO:0007338(single fertilization);GO:0009506(plasmodesma);GO:0009723(response to ethylene);GO:0009738(abscisic acid-activated signaling pathway);GO:0009741(response to brassinosteroid);GO:0009742(br…	NA	NA	NA	Serine/threonine protein kinase [Handroanthus impetiginosus]	NA	80.256	76.3922	79.3021	30.3586	28.6453	29.9005	2.65398	1.40816	0.00520871	1.14547	-0.319537	6.87262e-16	7.89883e-14	up	yes
	Am05g06600	Am05g06600	Am05g06600.T01	GO:0005886(plasma membrane);GO:0015171(amino acid transmembrane transporter activity);GO:0032973(amino acid export across plasma membrane);GO:0043090(amino acid import);GO:0080144(amino acid homeostasis)	NA	NA	NA	WAT1-related protein At1g21890 [Sesamum indicum]	NA	15.1905	15.7609	16.5916	2.86222	2.49023	3.41362	5.42353	2.43923	0.158374	1.80678	-0.170533	8.08013e-23	1.73878e-20	up	yes
	Am07g30000	Na-HKT1	Am07g30000.T02;Am07g30000.T01	GO:0005886(plasma membrane);GO:0015081(sodium ion transmembrane transporter activity);GO:0035725(sodium ion transmembrane transport);GO:0035725(sodium ion transmembrane transport)	NA	NA	NA	sodium transporter HKT1 [Sesamum indicum]	NA	11.1864	9.13045	9.48725	3.57971	4.19466	3.99963	2.53135	1.33991	0.222539	1.29588	-0.0406377	1.16036e-08	3.72568e-07	up	yes

## Sheet: Table S7
Table S7 Primers for qRT-PCR
	gene_id	forward primer	reverse primer
LT vs LTI	Am03g25880	TTATGAGTTATTTGGAGTTGAG	CTTCGCCTTCTTTGGTA
	Am05g23820	TTTGTCCCTTCACTTTCC	TCTGCTAATGGGCTAACG
	Am07g17140	TAGGAAATACAGGAGGAAT	CATCAACAAACTTTAGCC
	Am05g29810	GTAATGGAGCGGGGAATA	GAATCAACGGGGAGACC
	Am07g06860	GAACACTCTGCCCTCTAACC	TGGCTTCTCCCTCATCG
	Am01g27990	GATTCCCGCCATCACCT	GGCTACTCGCAACAACCA
	Am07g36540	TGCGAAAACGAGTATGGAA	GGTGAGAAGCAAGCAGAGG
	Am01g34620	ATTCCTCTGCCCCTTCT	TGTTACCTCTGTTTCTCCC
	Am04g25760	TTCGTCGTTTGTTGTCTCC	TTGGCTTCAAGGGTTCA
	Am05g23310	TTTCTTCATCTTACCTCC	AGCATCAAACAACTGGG
WL vs WLI	Am01g27660	ACCGCACCGTTCCAGTA	GCCAAATCATCCCCTCA
	Am07g18600	CACCTGATTCCGACGAC	GCAGCAATAGCATTACGAG
	Am01g56240	GAAACCCAACTTCCATCT	GGCTAAATCACTATCCACC
	Am04g27400	TCGCCTCGTTCAAGATT	GCATTGGTGGACTGGTT
	Am06g35490	TCTGTCATCCCCATACTC	ATTGATACTTGGCTTCTGT
	Am05g46010	GGCTCAGATTCCACCTCC	GCCCGTTATTACATTCGTTA
	Am04g12700	ACTAAGAAACACTCCCTACGC	TAAACGACGCAATACCATAA
	Am08g04450	CTCATCAGCCAAACCATC	GGGTGACATTGAGCCATA
	Am01g50290	CAAACTTGCCAGTGCCA	AAACCATTGTTCGGATT
LTWL vs LTWLI	Am02g53210	TACCTCGCCGCCTCATC	TCCTGCTCGGGCTCTTG
	Am06g04830	CTCAAAGTTGCGGTTCG	TTTCCATTCCATCTACTATCTC
	Am04g01060	AAATCTAATCATTCATAATCCCA	GGCACCAGGCTCTACCC
	Am02g10450	CCTCATCTCCCACAAACC	TTTGTAGTTGGGCGAGG
	Am05g04080	GCGGAGGAGGACTATCT	TCCACAAGCAAACAATCT
	Am03g21770	CTCGGCAGTTGTCACGC	ACTCAAACGACCTCATACCC
	Am04g20970	ATCATACTCCATTACCACCCC	TCTTGTCCGCTCAAAACG
	Am05g44690	GACAATGGCGGAGGTGG	TGCTCGTGGTGACGGTGC
	Am01g49290	AGCCTGAACGAAGAATCCA	TTACCGACCCACTCTACCC
	Am05g06040	GAGATGGCTACTGGAAAGG	TCTGGTATTGGTGGATGTG
	Am04g08900	CTGGGAGTTTCCTGATTG	TGTTGATTTTGTCGCATT
	Am05g03970	GTTTCGTCGTGGTTGTG	CTCCAAATGGGATTATGTT
	Am01g55050	TAGCCTTTGAAACTCCTT	CCTACCGATAATCCTACTG
	Am08g36350	AATGTAGGTGGTGAATAGTG	ACGATGATGGTAGAGGAG
	Am06g33570	CTTCTACCCGACAACATACT	TTCACAAAAGCAAACGAG
	Am05g06600	GTCCGCCTTCTTCATCG	ATTCCACCTTCCACCGT
	Am07g30000	AATCAGGCTCGCTTTCA	TTCTCCAATGCCCAACT
	bHLH100	AAACAGTAGCAGTATTGGT	TAGTCCTTCTTGTGGTG
	bHLH112	CCGCAAATCAAGGACTGG	TTTATGGAAGATGGGACG
	WRKY72	ATTGACGAGATTTGGTTC	CAGTGGATGGTTGTGAGT
	NAC62	AATCTCGGCAATCCTTAC	TCTTCCCAAAACTGACCT
	Am03g38280	AACTTTGGCTTACACCTT	TGAGATTGCTTTACATAGATA
	MYB86	GTGATTCTGCCTTGGTTC	GCCTCTTTGCCTTAGTTT
	WRKY53	AGGTTGCTTTTGTATCAT	TTCTTGCTTATCCTGTTC
	WRKY6	GTCGTTTTCTGACACCCT	GACTTATTGATTCCCTTGA
	WRKY26	GTTGAACGAGCATCCCACG	AAATCCCGAGAACGCAAA
	WRKY55	ACCACAGGAATCACCAGG	GGGAAGGGGAGGAAATAG
	bHLH162	CGAAATCAGATGAAGAAT	CAGAAGATAGCAGTAGTTAG
	NAC7	AAAGATGTCCTCGGTTCG	GGTGGGATTCCATACTGC
	NAC45	GGATGAGGAACTCGTCGC	CCTGAGCCGCCAGATGCC
	bHLH51	TTGTTTGGGGCATTTTAG	ACTGGCGGTTCTGTCCTC
	ERF25	ATTCTTAGTATGGCGGGTCA	GTGGTGGAGGGAGGTTCG
	WRKY12	CAGCGGTAACACCAACGA	GGAATTTCAGGCGACGAT
	SWEET6a	TATTTTGCTCGTCCCTTA	ACATTCTGTTTTCCATCT
	SWEET2	TCTTTGCTTTTGGGTTAT	TCTGGAATGTCGGTCTGA
	SWEET1	TGACAATGCTCAACTGCC	CAACAGTGAGGAGCCCAA
	ARF2	TACTGGAACTATTGTCGGC	GTTTCATCCCATCGCACC
	ARF10	TAGAACCGCACTCACCGT	ATCTCAGTAAGCCGCTCC
	ARF9	GTGCCGATAAGCCTACTG	ATGAGATGGACGGACAAA
	SWEET17	GGAGCTACAGTTCAGTCT	GCTTTGAGTTGTGCGTCT
	ARF5	TTGCTTACTACTGGCTGG	CTGTTAGCCCGTCTTATG
	SWEET7	TTCAAATCAAACAATAAACC	GTCAAGCCCACTTCTCCT
	ARF16	CTGGATTTCGGGACCTTT	ATACTTGCTCGCTGTGGC
	Am03g01530(AmUBI)	ATCCACCCTTCACCTTGTG	TTGTCAATGGTATCCGAGC

## Sheet: Table S8
Table S8 qRT-PCR expression data of TF, SWEET, and ARF genes
gene name	gene_id	LT	LTI	WL	WLI	LTWL	LTWLI
bHLH100	Am08g09250	-0.578386	-0.730134	-0.578386	1.69334	-0.578386	0.771947
bHLH112	Am02g06660	-0.813455	0.936944	-0.813455	1.46124	-0.813455	0.0421769
WRKY72	Am08g21260	-0.463142	-0.224916	-0.463142	2.0325	-0.463142	-0.418159
NAC62	Am01g20860	-0.356999	0.325625	-0.356999	1.82765	-0.356999	-1.08228
Am03g38280	Am03g38280	-0.436768	0.534336	-0.436768	1.77383	-0.436768	-0.997859
MYB86	Am03g41230	-0.559172	1.43532	-0.559172	-0.872005	-0.559172	1.1142
WRKY53	Am04g27390	-0.777973	0.152019	-0.777973	0.466125	-0.777973	1.71578
WRKY6	Am02g07860	-0.626166	-0.0464663	-0.626166	-0.0297001	-0.626166	1.95466
WRKY26	Am08g36840	-0.619543	-0.314965	-0.619543	0.25402	-0.619543	1.91958
WRKY55	Am07g21210	0.5903	-0.0345066	0.5903	-1.97407	0.5903	0.237678
bHLH162	Am02g05100	0.339219	0.584142	0.339219	-2.03189	0.339219	0.430094
NAC7	Am07g20270	0.385659	-1.25802	0.385659	-1.16728	0.385659	1.26832
NAC45	Am02g10060	-0.168905	-0.259801	-0.168905	-1.12557	-0.168905	1.89209
bHLH51	Am07g21630	-0.185688	1.71051	-0.185688	0.231202	-0.185688	-1.38465
ERF25	Am07g18520	0.353145	-1.40332	0.353145	1.31155	0.353145	-0.967664
WRKY12	Am02g40330	0.895339	-1.17094	0.895339	-0.562251	0.895339	-0.95283
SWEET6a	Am01g48300	0.504944	-1.96126	0.504944	0.60329	0.504944	-0.156863
SWEET2	Am01g56520	-0.284914	-0.642246	-0.284914	2.01804	-0.284914	-0.521054
SWEET1	Am01g43400	-0.509262	0.183424	-0.509262	1.95371	-0.509262	-0.609354
ARF2	Am06g19370	-0.118825	0.582364	-0.118825	1.40247	-0.118825	-1.62836
ARF10	Am04g06580	0.0103038	1.13969	0.0103038	0.642633	0.0103038	-1.81323
ARF9	Am02g32550	0.782769	-0.0880636	0.782769	-1.67771	0.782769	-0.582534
SWEET17	Am01g64160	0.514555	0.992903	0.514555	-1.30538	0.514555	-1.23119
ARF5	Am08g30010	-0.7115	0.354311	-0.7115	-0.0509785	-0.7115	1.83117
SWEET7	Am05g24130	-0.255616	2.00498	-0.255616	-0.525364	-0.255616	-0.712767
ARF16	Am08g30590	-0.692952	1.87403	-0.692952	-0.0127007	-0.692952	0.217532

## Sheet: Table S9
Table S9 DEG involved in photosynthesis and active oxygen metabolism
	gene_id	gene_name	transcript_id	GO	KEGG	KO_ENTRY	EC	Description	trans_type	FPKM.LTI_1	FPKM.LTI_2	FPKM.LTI_3	FPKM.LT_1	FPKM.LT_2	FPKM.LT_3	fc	log2(fc)	pval	qval	regulation	significant
LT vs LTI	Am01g04360	Am01g04360	Am01g04360.T01	GO:0005506(iron ion binding);GO:0009507(chloroplast);GO:0009535(chloroplast thylakoid membrane);GO:0009706(chloroplast inner membrane);GO:0010277(chlorophyllide a oxygenase [overall] activity);GO:0015995(chlorophyll biosynthetic process);GO:0016705(oxidoreductase activity, acting on paired donors, with incorporation or reduction of molecular oxygen);GO:0042651(thylakoid membrane);GO:0051537(2 iro…	00860(Porphyrin and chlorophyll metabolism)	K13600	EC:1.14.13.122	Chlorophyllide-a oxygenase [Handroanthus impetiginosus]	NA	6.2951	4.43224	5.91275	1.57578	1.98832	2.06637	2.95536	1.56334	2.33522e-08	9.24092e-07	up	yes
	Am04g25800	Am04g25800	Am04g25800.T03;Am04g25800.T01;Am04g25800.T02	GO:0005515(protein binding);GO:0004497(monooxygenase activity);GO:0005507(copper ion binding);GO:0009409(response to cold);GO:0009507(chloroplast);GO:0009535(chloroplast thylakoid membrane);GO:0009536(plastid);GO:0009570(chloroplast stroma);GO:0009573(chloroplast ribulose bisphosphate carboxylase complex);GO:0009579(thylakoid);GO:0009637(response to blue light);GO:0009853(photorespiration);GO:000…	00630(Glyoxylate and dicarboxylate metabolism);00710(Carbon fixation in photosynthetic organisms);00710(Carbon fixation in photosynthetic organisms)	K01602	EC:4.1.1.39	PREDICTED: ribulose bisphosphate carboxylase small chain, chloroplastic [Eucalyptus grandis];ribulose bisphosphate carboxylase small chain, chloroplastic-like [Olea europaea var. sylvestris]	NA	3279.74	3134.82	3299.98	1082.34	1118.29	1087.49	2.95444	1.56288	6.52067e-18	8.66386e-16	up	yes
	Am04g26570	Am04g26570	Am04g26570.T01	GO:0005515(protein binding)	00630(Glyoxylate and dicarboxylate metabolism);00710(Carbon fixation in photosynthetic organisms)	K01602	EC:4.1.1.39	PREDICTED: ribulose bisphosphate carboxylase small chain, chloroplastic [Eucalyptus grandis]	NA	263.801	254.04	405.186	138.154	131.031	141.672	2.24659	1.16774	1.77572e-07	5.88863e-06	up	yes
	Am07g20740	Am07g20740	Am07g20740.T01	GO:0003700(DNA binding transcription factor activity);GO:0005515(protein binding);GO:0006355(regulation of transcription, DNA-templated);GO:0009507(chloroplast);GO:0009523(photosystem II);GO:0009535(chloroplast thylakoid membrane);GO:0015979(photosynthesis);GO:0016021(integral component of membrane);GO:0016168(chlorophyll binding);GO:0018298(protein-chromophore linkage);GO:0019899(enzyme binding)…	NA	NA	NA	light-harvesting complex-like protein 3 isotype 1, chloroplastic [Sesamum indicum]	NA	0.936078	2.23579	1.65605	5.14546	4.00642	5.46561	0.330284	-1.59822	5.6565e-06	0.000125123	down	yes
	Am01g60160	Am01g60160	Am01g60160.T01	GO:0051213(dioxygenase activity)	00402(Benzoxazinoid biosynthesis)	K13229	EC:1.14.11.59	Iron/ascorbate family oxidoreductase [Handroanthus impetiginosus]	NA	1.76617	1.94239	1.28008	0.762392	0.654329	0.376574	0.359476	-1.47603	0.000119967	0.00179619	down	yes
	Am02g02940	Am02g02940	Am02g02940.T06;Am02g02940.T02;Am02g02940.T05;Am02g02940.T04;Am02g02940.T01;Am02g02940.T08;Am02g02940.T07;Am02g02940.T03	GO:0051213(dioxygenase activity);GO:0051213(dioxygenase activity)	00941(Flavonoid biosynthesis);00270(Cysteine and methionine metabolism);00270(Cysteine and methionine metabolism)	K05278;K00475;K05933;K05277	EC:1.14.20.6;EC:1.14.11.9;EC:1.14.17.4;EC:1.14.20.4	Iron/ascorbate family oxidoreductase [Handroanthus impetiginosus];uncharacterized protein LOC105167325 [Sesamum indicum]	NA	0.601926	0.572614	0.672865	0.153877	0.127647	0.178489	0.249005	-2.00575	2.32186e-09	1.10387e-07	down	yes
	Am02g21470	Am02g21470	Am02g21470.T01;Am02g21470.T02	GO:0009416(response to light stimulus);GO:0045487(gibberellin catabolic process);GO:0052634(C-19 gibberellin 2-beta-dioxygenase activity);GO:0052634(C-19 gibberellin 2-beta-dioxygenase activity)	00904(Diterpenoid biosynthesis);00904(Diterpenoid biosynthesis)	K04125	EC:1.14.11.13	Iron/ascorbate family oxidoreductase [Handroanthus impetiginosus]	NA	1.14798	0.71311	0.97461	0.549135	0.247321	0.618206	0.498876	-1.00325	0.0195962	0.106866	down	yes
	Am06g02980	Am06g02980	Am06g02980.T01	GO:0004601(peroxidase activity);GO:0005576(extracellular region);GO:0006979(response to oxidative stress);GO:0020037(heme binding);GO:0042744(hydrogen peroxide catabolic process);GO:0046872(metal ion binding);GO:0055114(oxidation-reduction process)	00940(Phenylpropanoid biosynthesis)	K00430	EC:1.11.1.7	peroxidase 16 [Sesamum indicum]	NA	7.76056	7.25286	6.88466	1.6691	1.62734	2.07109	0.245115	-2.02847	8.41058e-14	6.8874e-12	down	yes
	Am06g24240	Am06g24240	Am06g24240.T01	GO:0005618(cell wall);GO:0005773(vacuole);GO:0005783(endoplasmic reticulum);GO:0005886(plasma membrane);GO:0009506(plasmodesma);GO:0016020(membrane);GO:0016021(integral component of membrane);GO:0022857(transmembrane transporter activity);GO:0055085(transmembrane transport)	NA	NA	NA	PREDICTED: nucleobase-ascorbate transporter 6 [Beta vulgaris subsp. vulgaris]	NA	1.90518	1.33384	1.35433	0.865363	0.942695	0.421357	0.485358	-1.04288	0.00353221	0.0291168	down	yes
	Am06g32980	Am06g32980	Am06g32980.T01	GO:0004657(proline dehydrogenase activity);GO:0005739(mitochondrion);GO:0006537(glutamate biosynthetic process);GO:0006562(proline catabolic process);GO:0006979(response to oxidative stress);GO:0009414(response to water deprivation);GO:0010133(proline catabolic process to glutamate);GO:0042742(defense response to bacterium);GO:0055114(oxidation-reduction process);GO:0071949(FAD binding)	00330(Arginine and proline metabolism)	K00318	EC:1.5.-.-	Proline dehydrogenase 1, mitochondrial [Capsicum annuum]	NA	4.39372	3.73232	3.8343	1.0689	1.02554	1.18393	0.274104	-1.86721	1.26753e-12	9.08229e-11	down	yes
	Am06g37250	Am06g37250	Am06g37250.T01;Am06g37250.T04;Am06g37250.T03;Am06g37250.T05;Am06g37250.T02	GO:0005507(copper ion binding);GO:0009505(plant-type cell wall);GO:0009506(plasmodesma);GO:0016722(oxidoreductase activity, oxidizing metal ions);GO:0016722(oxidoreductase activity, oxidizing metal ions)	NA	NA	NA	L-ascorbate oxidase [Dorcoceras hygrometricum]	NA	0.199842	0.183514	0.410633	0.500531	0.840065	0.618719	2.46769	1.30316	0.00641294	0.0468204	up	yes
	Am07g32390	Am07g32390	Am07g32390.T01	GO:0004601(peroxidase activity);GO:0009505(plant-type cell wall);GO:0009664(plant-type cell wall organization)	00940(Phenylpropanoid biosynthesis)	K00430	EC:1.11.1.7	peroxidase 64 [Sesamum indicum]	NA	1.41324	1.86186	1.55955	3.82502	3.39006	5.30746	2.59016	1.37304	4.90782e-05	0.000838718	up	yes
	Am08g22660	Am08g22660	Am08g22660.T02;Am08g22660.T01;Am08g22660.T03	GO:0016491(oxidoreductase activity);GO:0055114(oxidation-reduction process);GO:0055114(oxidation-reduction process)	NA	NA	NA	probable transmembrane ascorbate ferrireductase 2 [Sesamum indicum];Transmembrane ascorbate ferrireductase [Actinidia chinensis var. chinensis]	NA	6.89935	6.08592	6.23734	21.1964	21.046	22.4216	3.36396	1.75016	1.17144e-14	1.05393e-12	up	yes
WL vs WLI	Am01g42980	Am01g42980	Am01g42980.T01	GO:0009507(chloroplast);GO:0009517(PSII associated light-harvesting complex II);GO:0009523(photosystem II);GO:0009534(chloroplast thylakoid);GO:0009535(chloroplast thylakoid membrane);GO:0009579(thylakoid);GO:0010027(thylakoid membrane organization);GO:0010196(nonphotochemical quenching);GO:0015979(photosynthesis);GO:0016020(membrane);GO:0016021(integral component of membrane);GO:0016168(chloroph…	00195(Photosynthesis)	K03542	NA	photosystem II 22 kDa protein, chloroplastic [Sesamum indicum]	NA	90.8292	97.8289	91.2885	41.2834	38.3667	46.6653	2.21625	1.14812	1.02172e-11	1.13069e-09	up	yes
	Am06g10560	Am06g10560	Am06g10560.T01	GO:0005886(plasma membrane);GO:0009416(response to light stimulus)	NA	NA	NA	Phototropic-responsive NPH3 family protein [Theobroma cacao]	NA	0.967864	1.12997	1.73667	0.354534	0.275692	0.634621	3.0316	1.60008	0.000589775	0.00914271	up	yes
	Am07g11720	Am07g11720	Am07g11720.T01;Am07g11720.T02	GO:0009416(response to light stimulus);GO:0009535(chloroplast thylakoid membrane);GO:0009768(photosynthesis, light harvesting in photosystem I);GO:0009941(chloroplast envelope);GO:0010287(plastoglobule);GO:0016168(chlorophyll binding);GO:0031409(pigment binding);GO:0031409(pigment binding)	00196(Photosynthesis - antenna proteins);00196(Photosynthesis - antenna proteins)	K08912	NA	PREDICTED: chlorophyll a-b binding protein of LHCII type 1-like [Erythranthe guttata]	NA	1.7756	1.17394	1.8235	0.305029	0.528635	0.0001	5.72468	2.5172	0.000222829	0.0040641	up	yes
	Am07g27790	Am07g27790	Am07g27790.T01	GO:0003674(molecular_function);GO:0008150(biological_process);GO:0009507(chloroplast);GO:0009543(chloroplast thylakoid lumen);GO:0009579(thylakoid);GO:0031977(thylakoid lumen)	NA	NA	NA	thylakoid lumenal 17.9 kDa protein, chloroplastic isoform X1 [Sesamum indicum]	NA	10.7301	10.3777	11.5825	5.068	5.49668	5.44425	2.04201	1.02999	7.72556e-06	0.000230025	up	yes
	AnMG0002274200.01	AnMG0002274200.01	AnMG0002274200.01.T01	GO:0009536(plastid)	00195(Photosynthesis)	K02703	EC:1.10.3.9	photosystem II Q(b) protein D1, partial (chloroplast) [Cypripedium japonicum]	NA	54.1742	54.1963	66.396	29.8874	24.4676	27.1916	2.14315	1.09973	8.38721e-10	6.52737e-08	up	yes
	Am04g42460	Am04g42460	Am04g42460.T02;Am04g42460.T01	GO:0003674(molecular_function);GO:0006979(response to oxidative stress);GO:0009507(chloroplast);GO:0009535(chloroplast thylakoid membrane);GO:0016021(integral component of membrane);GO:0031969(chloroplast membrane);GO:0031969(chloroplast membrane)	NA	NA	NA	hypothetical protein CDL12_05987 [Handroanthus impetiginosus];PREDICTED: photosynthetic NDH subunit of subcomplex B 5, chloroplastic [Erythranthe guttata]	NA	1.70606	9.80526	6.50015	7.24717	89.4239	3.2028	0.180342	-2.47119	0.00688694	0.0640673	down	yes
	Am01g06220	Am01g06220	Am01g06220.T01	GO:0016491(oxidoreductase activity);GO:0055114(oxidation-reduction process)	NA	NA	NA	PREDICTED: probable transmembrane ascorbate ferrireductase 3 [Erythranthe guttata]	NA	1.41087	1.45826	2.70914	0.811367	0.768094	0.523121	2.65305	1.40765	0.00232439	0.0275204	up	yes
	Am01g11420	Am01g11420	Am01g11420.T01	GO:0005507(copper ion binding);GO:0009505(plant-type cell wall);GO:0009506(plasmodesma);GO:0016722(oxidoreductase activity, oxidizing metal ions)	00053(Ascorbate and aldarate metabolism)	K00423	EC:1.10.3.3	PREDICTED: L-ascorbate oxidase homolog [Erythranthe guttata]	NA	0.928685	1.0064	0.903846	0.24719	0.411678	0.314938	2.91529	1.54364	0.000144188	0.00278275	up	yes
	Am05g01070	Am05g01070	Am05g01070.T01;Am05g01070.T02;Am05g01070.T03	GO:0005886(plasma membrane);GO:0009506(plasmodesma);GO:0009507(chloroplast);GO:0015207(adenine transmembrane transporter activity);GO:0015208(guanine transmembrane transporter activity);GO:0015210(uracil transmembrane transporter activity);GO:0015294(solute:cation symporter activity);GO:0016020(membrane);GO:0016021(integral component of membrane);GO:0022857(transmembrane transporter activity);GO:…	NA	NA	NA	nucleobase-ascorbate transporter 3 [Sesamum indicum]	NA	0.550772	20.1915	0.634536	0.837936	0.884017	1.04949	7.71327	2.94734	0.00169194	0.0214093	up	yes
	Am01g60150	Am01g60150	Am01g60150.T01	GO:0051213(dioxygenase activity)	00402(Benzoxazinoid biosynthesis)	K13229	EC:1.14.11.59	Iron/ascorbate family oxidoreductase [Handroanthus impetiginosus]	NA	0.12304	0.138425	0.0001	0.76326	1.21108	1.85191	0.0683607	-3.87069	4.72166e-08	2.52503e-06	down	yes
	Am01g60180	Am01g60180	Am01g60180.T01;Am01g60180.T02	GO:0051213(dioxygenase activity);GO:0051213(dioxygenase activity)	00402(Benzoxazinoid biosynthesis);00402(Benzoxazinoid biosynthesis)	K13229	EC:1.14.11.59	Iron/ascorbate family oxidoreductase [Handroanthus impetiginosus]	NA	1.21408	1.03923	0.869141	2.05031	2.44778	2.12197	0.471665	-1.08417	0.00265422	0.0304647	down	yes
	Am07g00480	Am07g00480	Am07g00480.T01	GO:0004601(peroxidase activity);GO:0009505(plant-type cell wall);GO:0009664(plant-type cell wall organization)	00940(Phenylpropanoid biosynthesis)	K00430	EC:1.11.1.7	putative Peroxidase 48 [Quercus suber]	NA	0.256174	0.643828	1.16284	1.44021	1.7597	1.55799	0.433562	-1.20569	0.0301168	0.181089	down	yes
LTWL vs LTWLI	Am01g09640	Am01g09640	Am01g09640.T01	GO:0003735(structural constituent of ribosome);GO:0005840(ribosome);GO:0006412(translation);GO:0009507(chloroplast);GO:0009570(chloroplast stroma);GO:0009793(embryo development ending in seed dormancy);GO:0009941(chloroplast envelope);GO:0019843(rRNA binding);GO:0042254(ribosome biogenesis)	03010(Ribosome)	K02909	NA	50S ribosomal protein L31, chloroplastic [Sesamum indicum]	NA	40.6811	37.6714	33.2337	86.1274	85.3543	87.0124	0.431678	-1.21197	4.4706e-09	1.57272e-07	down	yes
	Am01g25100	Am01g25100	Am01g25100.T01;Am01g25100.T02	GO:0005975(carbohydrate metabolic process);GO:0005986(sucrose biosynthetic process);GO:0006000(fructose metabolic process);GO:0006002(fructose 6-phosphate metabolic process);GO:0006094(gluconeogenesis);GO:0009507(chloroplast);GO:0009570(chloroplast stroma);GO:0009579(thylakoid);GO:0009941(chloroplast envelope);GO:0016051(carbohydrate biosynthetic process);GO:0019252(starch biosynthetic process);G…	00710(Carbon fixation in photosynthetic organisms);00710(Carbon fixation in photosynthetic organisms)	K01100	EC:3.1.3.37	sedoheptulose-1,7-bisphosphatase, chloroplastic [Sesamum indicum]	NA	46.0393	35.9067	45.4859	123.826	118.889	113.885	0.357352	-1.48458	1.23555e-14	1.16245e-12	down	yes
	Am01g39460	Am01g39460	Am01g39460.T01	GO:0009507(chloroplast);GO:0009534(chloroplast thylakoid);GO:0009535(chloroplast thylakoid membrane);GO:0009538(photosystem I reaction center);GO:0009579(thylakoid);GO:0009735(response to cytokinin);GO:0009941(chloroplast envelope);GO:0010287(plastoglobule);GO:0015979(photosynthesis);GO:0016020(membrane)	00195(Photosynthesis)	K02693	NA	PREDICTED: photosystem I reaction center subunit IV, chloroplastic [Erythranthe guttata]	NA	57.5947	58.5008	60.2796	147.624	130.667	136.06	0.425666	-1.2322	7.33174e-11	3.58228e-09	down	yes
	Am01g41380	Am01g41380	Am01g41380.T01	GO:0009416(response to light stimulus);GO:0009535(chloroplast thylakoid membrane);GO:0009768(photosynthesis, light harvesting in photosystem I);GO:0009941(chloroplast envelope);GO:0010287(plastoglobule);GO:0016168(chlorophyll binding);GO:0031409(pigment binding)	00196(Photosynthesis - antenna proteins)	K08916	NA	PREDICTED: chlorophyll a-b binding protein CP26, chloroplastic [Gossypium raimondii]	NA	109.652	102.897	116.809	225.749	254.382	233.121	0.461768	-1.11476	6.02432e-10	2.5074e-08	down	yes
	Am01g46110	Am01g46110	Am01g46110.T01;Am01g46110.T02;Am01g46110.T03	GO:0009416(response to light stimulus);GO:0009535(chloroplast thylakoid membrane);GO:0009768(photosynthesis, light harvesting in photosystem I);GO:0009941(chloroplast envelope);GO:0010287(plastoglobule);GO:0016168(chlorophyll binding);GO:0031409(pigment binding);GO:0031409(pigment binding)	00196(Photosynthesis - antenna proteins);00196(Photosynthesis - antenna proteins)	K08911	NA	photosystem I chlorophyll a/b-binding protein 5, chloroplastic [Sesamum indicum];photosystem I chlorophyll a/b-binding protein 5, chloroplastic [Olea europaea var. sylvestris]	NA	14.291	15.7614	15.9368	44.3905	38.2295	44.3844	0.362108	-1.46551	1.60958e-12	1.0469e-10	down	yes
	Am01g49240	Am01g49240	Am01g49240.T01	GO:0009416(response to light stimulus);GO:0009535(chloroplast thylakoid membrane);GO:0009768(photosynthesis, light harvesting in photosystem I);GO:0009941(chloroplast envelope);GO:0010287(plastoglobule);GO:0016168(chlorophyll binding);GO:0031409(pigment binding)	00196(Photosynthesis - antenna proteins)	K08912	NA	chlorophyll a-b binding protein 21, chloroplastic-like [Sesamum indicum]	NA	11.2091	13.5177	12.1037	29.3163	30.9053	33.2765	0.393917	-1.34404	9.16828e-10	3.71465e-08	down	yes
	Am01g49250	Am01g49250	Am01g49250.T01	GO:0009416(response to light stimulus);GO:0009535(chloroplast thylakoid membrane);GO:0009768(photosynthesis, light harvesting in photosystem I);GO:0009941(chloroplast envelope);GO:0010287(plastoglobule);GO:0016168(chlorophyll binding);GO:0031409(pigment binding)	00196(Photosynthesis - antenna proteins)	K08912	NA	PREDICTED: chlorophyll a-b binding protein 21, chloroplastic-like [Nicotiana attenuata]	NA	98.0754	99.3937	116.407	253.087	259.024	272.328	0.400128	-1.32147	3.84474e-13	2.79753e-11	down	yes
	Am01g49290	Am01g49290	Am01g49290.T01	GO:0009416(response to light stimulus);GO:0009535(chloroplast thylakoid membrane);GO:0009768(photosynthesis, light harvesting in photosystem I);GO:0009941(chloroplast envelope);GO:0010287(plastoglobule);GO:0016168(chlorophyll binding);GO:0031409(pigment binding)	00196(Photosynthesis - antenna proteins)	K08912	NA	chlorophyll a-b binding protein 21, chloroplastic-like [Sesamum indicum]	NA	239.809	245.462	252.605	584.038	554.067	565.096	0.433229	-1.2068	2.15807e-12	1.36417e-10	down	yes
	Am01g53970	Am01g53970	Am01g53970.T01	GO:0009543(chloroplast thylakoid lumen);GO:0010206(photosystem II repair);GO:0010207(photosystem II assembly)	00195(Photosynthesis)	K08902	NA	photosystem II repair protein PSB27-H1, chloroplastic [Sesamum indicum]	NA	20.8831	18.342	24.0141	55.8336	52.4802	55.5581	0.385906	-1.37368	4.9388e-10	2.12557e-08	down	yes
	Am02g00890	Am02g00890	Am02g00890.T01	GO:0003674(molecular_function);GO:0009507(chloroplast);GO:0009534(chloroplast thylakoid);GO:0009535(chloroplast thylakoid membrane);GO:0009538(photosystem I reaction center);GO:0009579(thylakoid);GO:0009941(chloroplast envelope);GO:0010287(plastoglobule);GO:0015979(photosynthesis);GO:0016020(membrane);GO:0016021(integral component of membrane)	00195(Photosynthesis)	K02694	NA	Photosystem I [Handroanthus impetiginosus]	NA	198.915	167.352	214.722	547.998	504.988	515.18	0.37049	-1.43249	4.35331e-15	4.35934e-13	down	yes
	Am02g01350	Am02g01350	Am02g01350.T01	GO:0009507(chloroplast);GO:0009522(photosystem I);GO:0009534(chloroplast thylakoid);GO:0009535(chloroplast thylakoid membrane);GO:0009579(thylakoid);GO:0015979(photosynthesis);GO:0016020(membrane);GO:0016021(integral component of membrane);GO:0016168(chlorophyll binding)	00195(Photosynthesis)	K02698	NA	PREDICTED: photosystem I reaction center subunit psaK, chloroplastic [Erythranthe guttata]	NA	24.5824	22.9555	27.3523	60.7158	56.8626	60.7843	0.419876	-1.25196	1.70172e-09	6.53176e-08	down	yes
	Am02g08440	Am02g08440	Am02g08440.T01	GO:0003674(molecular_function);GO:0009507(chloroplast);GO:0009523(photosystem II);GO:0009535(chloroplast thylakoid membrane);GO:0015979(photosynthesis);GO:0016021(integral component of membrane);GO:0042549(photosystem II stabilization)	00195(Photosynthesis)	K02721	NA	PREDICTED: photosystem II reaction center W protein, chloroplastic [Erythranthe guttata]	NA	32.9321	25.7562	29.7177	66.4233	65.4116	59.0049	0.463247	-1.11015	1.4338e-07	3.65736e-06	down	yes
	Am02g14600	Am02g14600	Am02g14600.T01	GO:0004729(oxygen-dependent protoporphyrinogen oxidase activity);GO:0005515(protein binding);GO:0006779(porphyrin-containing compound biosynthetic process);GO:0006782(protoporphyrinogen IX biosynthetic process);GO:0009507(chloroplast);GO:0009534(chloroplast thylakoid);GO:0009941(chloroplast envelope);GO:0015995(chlorophyll biosynthetic process);GO:0055114(oxidation-reduction process)	00860(Porphyrin and chlorophyll metabolism)	K00231	EC:1.3.3.4;EC:1.3.3.15	PREDICTED: protoporphyrinogen oxidase 1, chloroplastic [Erythranthe guttata]	NA	10.1087	11.248	11.8955	27.2084	22.0823	24.0618	0.45332	-1.1414	5.37044e-08	1.52575e-06	down	yes
	Am02g22230	Am02g22230	Am02g22230.T01	GO:0005509(calcium ion binding);GO:0009507(chloroplast);GO:0009535(chloroplast thylakoid membrane);GO:0009543(chloroplast thylakoid lumen);GO:0009579(thylakoid);GO:0009654(photosystem II oxygen evolving complex);GO:0015979(photosynthesis);GO:0019898(extrinsic component of membrane);GO:0030095(chloroplast photosystem II)	00195(Photosynthesis)	K02717	NA	photosynthetic NDH subunit of lumenal location 1, chloroplastic [Sesamum indicum]	NA	15.4524	14.1204	14.6274	35.847	41.3433	41.4128	0.372673	-1.42402	6.04272e-11	2.98856e-09	down	yes
	Am02g23820	Am02g23820	Am02g23820.T01;Am02g23820.T02	GO:0000427(plastid-encoded plastid RNA polymerase complex);GO:0009508(plastid chromosome);GO:0009534(chloroplast thylakoid);GO:0009658(chloroplast organization);GO:0010027(thylakoid membrane organization);GO:0016279(protein-lysine N-methyltransferase activity);GO:0018026(peptidyl-lysine monomethylation);GO:0042793(plastid transcription);GO:0042793(plastid transcription)	NA	NA	NA	PREDICTED: ribulose-1,5 bisphosphate carboxylase/oxygenase large subunit N-methyltransferase, chloroplastic-like [Erythranthe guttata];Protein plastid transcriptionally active 14 [Vitis vinifera]	NA	2.41542	1.49621	2.38096	5.22601	4.14512	6.02496	0.408714	-1.29084	1.11244e-05	0.000169447	down	yes
	Am02g29930	Am02g29930	Am02g29930.T01	GO:0005509(calcium ion binding);GO:0009507(chloroplast);GO:0009535(chloroplast thylakoid membrane);GO:0009543(chloroplast thylakoid lumen);GO:0009579(thylakoid);GO:0009654(photosystem II oxygen evolving complex);GO:0015979(photosynthesis);GO:0019898(extrinsic component of membrane);GO:0031977(thylakoid lumen)	NA	NA	NA	Photosystem II [Handroanthus impetiginosus]	NA	0.564032	0.314546	0.75016	1.50353	1.78256	1.22252	0.361251	-1.46893	0.00314124	0.018601	down	yes
	Am02g36410	Am02g36410	Am02g36410.T01	GO:0003674(molecular_function);GO:0008150(biological_process);GO:0009507(chloroplast);GO:0009534(chloroplast thylakoid);GO:0009535(chloroplast thylakoid membrane);GO:0009579(thylakoid);GO:0009941(chloroplast envelope);GO:0010287(plastoglobule);GO:0016021(integral component of membrane)	00562(Inositol phosphate metabolism);04070(Phosphatidylinositol signaling system)	K01092	EC:3.1.3.25	PREDICTED: protein CURVATURE THYLAKOID 1A, chloroplastic-like [Erythranthe guttata]	NA	79.6014	78.3905	79.783	213.315	207.992	215.897	0.373154	-1.42216	1.70151e-15	1.83075e-13	down	yes
	Am02g52270	Am02g52270	Am02g52270.T01	GO:0003674(molecular_function);GO:0009507(chloroplast);GO:0009523(photosystem II);GO:0009535(chloroplast thylakoid membrane);GO:0015979(photosynthesis);GO:0016021(integral component of membrane);GO:0042549(photosystem II stabilization)	00195(Photosynthesis)	K02721	NA	PREDICTED: photosystem II reaction center W protein, chloroplastic [Erythranthe guttata]	NA	107.088	102.151	98.7309	334.103	320.056	335.21	0.31128	-1.68372	4.40709e-21	7.75189e-19	down	yes
	Am03g08310	Am03g08310	Am03g08310.T02;Am03g08310.T01	GO:0003674(molecular_function);GO:0009507(chloroplast);GO:0009523(photosystem II);GO:0009535(chloroplast thylakoid membrane);GO:0015979(photosynthesis);GO:0016021(integral component of membrane);GO:0042549(photosystem II stabilization);GO:0042549(photosystem II stabilization)	00195(Photosynthesis);00195(Photosynthesis)	K02721	NA	PREDICTED: photosystem II reaction center W protein, chloroplastic [Erythranthe guttata]	NA	79.0778	61.2123	82.2288	212.75	204.674	193.589	0.36418	-1.45728	3.92785e-14	3.39541e-12	down	yes
	Am03g18200	Am03g18200	Am03g18200.T01	GO:0009416(response to light stimulus);GO:0009535(chloroplast thylakoid membrane);GO:0009768(photosynthesis, light harvesting in photosystem I);GO:0009941(chloroplast envelope);GO:0010287(plastoglobule);GO:0016168(chlorophyll binding);GO:0031409(pigment binding)	00196(Photosynthesis - antenna proteins)	K08913	NA	chlorophyll a-b binding protein 5, chloroplastic [Sesamum indicum]	NA	236.509	276.406	281.746	600.962	553.676	483.603	0.48507	-1.04374	1.36894e-08	4.31996e-07	down	yes
	Am03g22470	Am03g22470	Am03g22470.T01	GO:0005509(calcium ion binding);GO:0005515(protein binding);GO:0009507(chloroplast);GO:0009534(chloroplast thylakoid);GO:0009543(chloroplast thylakoid lumen);GO:0009570(chloroplast stroma);GO:0009579(thylakoid);GO:0009654(photosystem II oxygen evolving complex);GO:0015979(photosynthesis);GO:0019898(extrinsic component of membrane);GO:0031977(thylakoid lumen)	NA	NA	NA	psbP domain-containing protein 6, chloroplastic [Sesamum indicum]	NA	7.58586	10.479	8.96417	20.4458	21.1052	20.9829	0.432229	-1.21013	1.25222e-07	3.23911e-06	down	yes
	Am03g37920	Am03g37920	Am03g37920.T01	GO:0005887(integral component of plasma membrane);GO:0008519(ammonium transmembrane transporter activity);GO:0015695(organic cation transport);GO:0019740(nitrogen utilization);GO:0072488(ammonium transmembrane transport)	NA	NA	NA	PREDICTED: photosynthetic NDH subunit of subcomplex B 2, chloroplastic [Erythranthe guttata]	NA	10.4239	10.4995	10.939	27.192	27.4047	22.4428	0.413585	-1.27374	6.07018e-09	2.08114e-07	down	yes
	Am03g40330	Am03g40330	Am03g40330.T01	GO:0009416(response to light stimulus);GO:0009535(chloroplast thylakoid membrane);GO:0009768(photosynthesis, light harvesting in photosystem I);GO:0009941(chloroplast envelope);GO:0010287(plastoglobule);GO:0016168(chlorophyll binding);GO:0031409(pigment binding)	00196(Photosynthesis - antenna proteins)	K08917	NA	chlorophyll a-b binding protein CP24 10A, chloroplastic [Sesamum indicum]	NA	15.3083	15.8063	12.9838	47.8668	39.3571	41.6208	0.34226	-1.54684	2.96684e-12	1.84656e-10	down	yes
	Am04g05230	Am04g05230	Am04g05230.T01	GO:0009416(response to light stimulus);GO:0009535(chloroplast thylakoid membrane);GO:0009768(photosynthesis, light harvesting in photosystem I);GO:0009941(chloroplast envelope);GO:0010287(plastoglobule);GO:0016168(chlorophyll binding);GO:0031409(pigment binding)	00196(Photosynthesis - antenna proteins)	K08910	NA	chlorophyll a-b binding protein 4, chloroplastic [Sesamum indicum]	NA	226.814	213.409	239.395	465.582	463.939	461.387	0.488615	-1.03323	1.85353e-09	7.02121e-08	down	yes
	Am04g05390	Am04g05390	Am04g05390.T01	GO:0009416(response to light stimulus);GO:0009535(chloroplast thylakoid membrane);GO:0009768(photosynthesis, light harvesting in photosystem I);GO:0009941(chloroplast envelope);GO:0010287(plastoglobule);GO:0016168(chlorophyll binding);GO:0031409(pigment binding)	00196(Photosynthesis - antenna proteins)	K08910	NA	PREDICTED: chlorophyll a-b binding protein 4, chloroplastic [Erythranthe guttata]	NA	210.551	213.359	201.921	421.66	439.157	451.693	0.47682	-1.06848	5.49019e-10	2.31366e-08	down	yes
	Am04g08280	Am04g08280	Am04g08280.T02;Am04g08280.T04;Am04g08280.T03;Am04g08280.T01	GO:0009416(response to light stimulus);GO:0009535(chloroplast thylakoid membrane);GO:0009768(photosynthesis, light harvesting in photosystem I);GO:0009941(chloroplast envelope);GO:0010287(plastoglobule);GO:0016168(chlorophyll binding);GO:0031409(pigment binding);GO:0031409(pigment binding)	00196(Photosynthesis - antenna proteins);00196(Photosynthesis - antenna proteins)	K08908	NA	chlorophyll a-b binding protein, chloroplastic [Sesamum indicum]	NA	7.57931	8.04826	2.89156	7.95472	19.2172	18.8328	0.402548	-1.31277	0.000871061	0.00669955	down	yes
	Am04g17020	Am04g17020	Am04g17020.T01	GO:0005509(calcium ion binding);GO:0005515(protein binding);GO:0008266(poly(U) RNA binding);GO:0009507(chloroplast);GO:0009534(chloroplast thylakoid);GO:0009535(chloroplast thylakoid membrane);GO:0009543(chloroplast thylakoid lumen);GO:0009570(chloroplast stroma);GO:0009579(thylakoid);GO:0009654(photosystem II oxygen evolving complex);GO:0010205(photoinhibition);GO:0010207(photosystem II assembly…	00195(Photosynthesis)	K02716	NA	oxygen-evolving enhancer protein 1, chloroplastic [Olea europaea var. sylvestris]	NA	158.501	160.13	162.294	329.948	318.709	330.152	0.491337	-1.02521	2.86342e-09	1.04175e-07	down	yes
	Am04g40390	Am04g40390	Am04g40390.T02;Am04g40390.T01	GO:0003676(nucleic acid binding);GO:0004519(endonuclease activity);GO:0009507(chloroplast);GO:0009507(chloroplast)	NA	NA	NA	photosystem II stability/assembly factor HCF136, chloroplastic isoform X2 [Sesamum indicum]	NA	5.56995	3.74341	3.7496	10.0326	10.6177	9.02852	0.440145	-1.18395	5.89954e-05	0.000714158	down	yes
	Am04g41150	Am04g41150	Am04g41150.T02;Am04g41150.T01;Am04g41150.T03;Am04g41150.T06;Am04g41150.T05;Am04g41150.T04	GO:0009507(chloroplast);GO:0033354(chlorophyll cycle);GO:0090415(7-hydroxymethyl chlorophyll a reductase activity);GO:0090415(7-hydroxymethyl chlorophyll a reductase activity)	00860(Porphyrin and chlorophyll metabolism);00860(Porphyrin and chlorophyll metabolism)	K18010	EC:1.17.7.2	7-hydroxymethyl chlorophyll a reductase, chloroplastic-like [Papaver somniferum];7-hydroxymethyl chlorophyll a reductase chloroplastic [Zea mays]	NA	0.467868	0.595384	0.600637	1.5186	1.02427	0.883475	0.485616	-1.04211	0.00622973	0.0320079	down	yes
	Am05g04080	Am05g04080	Am05g04080.T01	GO:0005507(copper ion binding);GO:0009055(electron transfer activity);GO:0009507(chloroplast);GO:0009535(chloroplast thylakoid membrane);GO:0009543(chloroplast thylakoid lumen);GO:0009579(thylakoid);GO:0031977(thylakoid lumen);GO:0046688(response to copper ion)	00195(Photosynthesis)	K02638	NA	plastocyanin [Sesamum indicum]	NA	41.758	37.7083	36.5078	101.751	105.516	106.527	0.369587	-1.43602	3.7501e-14	3.25566e-12	down	yes
	Am06g11700	Am06g11700	Am06g11700.T01	GO:0000302(response to reactive oxygen species);GO:0004130(cytochrome-c peroxidase activity);GO:0004601(peroxidase activity);GO:0005515(protein binding);GO:0005634(nucleus);GO:0005737(cytoplasm);GO:0006979(response to oxidative stress);GO:0009507(chloroplast);GO:0009534(chloroplast thylakoid);GO:0009535(chloroplast thylakoid membrane);GO:0009543(chloroplast thylakoid lumen);GO:0009579(thylakoid);…	00053(Ascorbate and aldarate metabolism);00480(Glutathione metabolism)	K00434	EC:1.11.1.11	thylakoid lumenal 29 kDa protein, chloroplastic [Sesamum indicum]	NA	12.8135	14.3455	15.7308	30.1029	32.143	32.8262	0.451129	-1.14839	8.98863e-08	2.42107e-06	down	yes
	Am06g14410	Am06g14410	Am06g14410.T01;Am06g14410.T02;Am06g14410.T03;Am06g14410.T04	GO:0009416(response to light stimulus);GO:0009535(chloroplast thylakoid membrane);GO:0009768(photosynthesis, light harvesting in photosystem I);GO:0009941(chloroplast envelope);GO:0010287(plastoglobule);GO:0016168(chlorophyll binding);GO:0031409(pigment binding);GO:0031409(pigment binding)	00196(Photosynthesis - antenna proteins);00196(Photosynthesis - antenna proteins)	K08908	NA	PREDICTED: chlorophyll a-b binding protein, chloroplastic isoform X1 [Erythranthe guttata];hypothetical protein CDL12_13375 [Handroanthus impetiginosus]	NA	328.112	329.099	337.837	731.644	726.479	717.029	0.457462	-1.12828	2.23421e-11	1.20839e-09	down	yes
	Am06g18070	Am06g18070	Am06g18070.T01;Am06g18070.T04;Am06g18070.T03;Am06g18070.T02	GO:0009507(chloroplast);GO:0009534(chloroplast thylakoid);GO:0009535(chloroplast thylakoid membrane);GO:0009773(photosynthetic electron transport in photosystem I);GO:0010598(NAD(P)H dehydrogenase complex (plastoquinone));GO:0010598(NAD(P)H dehydrogenase complex (plastoquinone))	NA	NA	NA	photosynthetic NDH subunit of subcomplex B 1, chloroplastic [Sesamum indicum]	NA	13.1498	13.4256	13.1197	29.1645	25.2733	25.369	0.49739	-1.00755	3.21776e-07	7.51603e-06	down	yes
	Am07g05660	Am07g05660	Am07g05660.T01	GO:0005524(ATP binding);GO:0009507(chloroplast);GO:0009570(chloroplast stroma);GO:0009735(response to cytokinin);GO:0010007(magnesium chelatase complex);GO:0015979(photosynthesis);GO:0015995(chlorophyll biosynthetic process);GO:0016851(magnesium chelatase activity);GO:0016887(ATPase activity)	00860(Porphyrin and chlorophyll metabolism)	K03405	EC:6.6.1.1	magnesium-chelatase subunit ChlI, chloroplastic-like [Sesamum indicum]	NA	200.124	196.5	196.974	468.261	464.659	482.422	0.419403	-1.25359	1.30043e-13	1.02755e-11	down	yes
	Am07g35800	Am07g35800	Am07g35800.T01	GO:0007623(circadian rhythm);GO:0009507(chloroplast);GO:0009523(photosystem II);GO:0009535(chloroplast thylakoid membrane);GO:0009644(response to high light intensity);GO:0015979(photosynthesis);GO:0016021(integral component of membrane);GO:0016168(chlorophyll binding);GO:0018298(protein-chromophore linkage);GO:0055085(transmembrane transport)	NA	NA	NA	light-harvesting complex-like protein OHP1, chloroplastic [Sesamum indicum]	NA	80.6782	76.2963	74.6008	170.013	168.952	166.831	0.457843	-1.12707	1.74497e-09	6.65985e-08	down	yes
	Am07g36560	Am07g36560	Am07g36560.T01	GO:0009416(response to light stimulus);GO:0009535(chloroplast thylakoid membrane);GO:0009768(photosynthesis, light harvesting in photosystem I);GO:0009941(chloroplast envelope);GO:0010287(plastoglobule);GO:0016168(chlorophyll binding);GO:0031409(pigment binding)	00196(Photosynthesis - antenna proteins)	K08915	NA	chlorophyll a-b binding protein CP29.1, chloroplastic [Solanum lycopersicum]	NA	187.549	176.825	190.994	388.878	397.385	389.136	0.472494	-1.08163	2.94731e-10	1.29887e-08	down	yes
	Am01g60130	Am01g60130	Am01g60130.T01	GO:0051213(dioxygenase activity)	00402(Benzoxazinoid biosynthesis)	K13229	EC:1.14.11.59	Iron/ascorbate family oxidoreductase [Handroanthus impetiginosus]	NA	9.87765	8.98234	9.74334	2.60686	2.88125	2.03818	3.80046	1.92617	1.23312e-12	8.28688e-11	up	yes
	Am04g08900	Am04g08900	Am04g08900.T01	GO:0004601(peroxidase activity);GO:0005576(extracellular region);GO:0006979(response to oxidative stress);GO:0009809(lignin biosynthetic process);GO:0020037(heme binding);GO:0042744(hydrogen peroxide catabolic process);GO:0046872(metal ion binding);GO:0055114(oxidation-reduction process)	00940(Phenylpropanoid biosynthesis)	K00430	EC:1.11.1.7	peroxidase 72 [Sesamum indicum]	NA	4.45297	5.4131	4.72171	1.44	1.596	1.5705	3.16678	1.66302	7.19865e-08	1.98115e-06	up	yes
	Am06g28780	Am06g28780	Am06g28780.T01	GO:0004601(peroxidase activity);GO:0005576(extracellular region);GO:0006979(response to oxidative stress);GO:0020037(heme binding);GO:0042744(hydrogen peroxide catabolic process);GO:0046872(metal ion binding);GO:0055114(oxidation-reduction process)	00940(Phenylpropanoid biosynthesis)	K00430	EC:1.11.1.7	Peroxidase [Handroanthus impetiginosus]	NA	54.6678	45.039	41.5134	6.42838	4.197	8.82781	7.25949	2.85987	6.69495e-24	1.61221e-21	up	yes
	Am06g37310	Am06g37310	Am06g37310.T01	GO:0004601(peroxidase activity);GO:0005576(extracellular region);GO:0006979(response to oxidative stress);GO:0020037(heme binding);GO:0042744(hydrogen peroxide catabolic process);GO:0046872(metal ion binding);GO:0055114(oxidation-reduction process)	00940(Phenylpropanoid biosynthesis)	K00430	EC:1.11.1.7	Peroxidase [Handroanthus impetiginosus]	NA	11.123	12.2914	12.0293	3.74031	2.97988	2.82774	3.71219	1.89227	5.3076e-13	3.74084e-11	up	yes
	Am07g20950	Am07g20950	Am07g20950.T01;Am07g20950.T03;Am07g20950.T02	GO:0004784(superoxide dismutase activity);GO:0005515(protein binding);GO:0009295(nucleoid);GO:0009411(response to UV);GO:0009507(chloroplast);GO:0009534(chloroplast thylakoid);GO:0009579(thylakoid);GO:0042644(chloroplast nucleoid);GO:0046872(metal ion binding);GO:0055114(oxidation-reduction process);GO:0055114(oxidation-reduction process)	04146(Peroxisome);04146(Peroxisome)	K04564	EC:1.15.1.1	superoxide dismutase [Fe], chloroplastic-like [Olea europaea var. sylvestris]	NA	51.9892	43.253	43.3089	9.01668	11.645	9.05862	4.66184	2.2209	1.34547e-24	3.75348e-22	up	yes
	Am08g25830	Am08g25830	Am08g25830.T01;Am08g25830.T02	GO:0000302(response to reactive oxygen species);GO:0004130(cytochrome-c peroxidase activity);GO:0005737(cytoplasm);GO:0005829(cytosol);GO:0006979(response to oxidative stress);GO:0009507(chloroplast);GO:0016688(L-ascorbate peroxidase activity);GO:0020037(heme binding);GO:0034599(cellular response to oxidative stress);GO:0042744(hydrogen peroxide catabolic process);GO:0046872(metal ion binding);GO…	00053(Ascorbate and aldarate metabolism);00480(Glutathione metabolism);00480(Glutathione metabolism)	K00434	EC:1.11.1.11	L-ascorbate peroxidase 2, cytosolic [Sesamum indicum]	NA	0.705789	0.604172	0.501562	0.298488	0.174942	0.0789021	3.27977	1.71359	0.00535064	0.0283629	up	yes
	Am03g30180	Am03g30180	Am03g30180.T01	GO:0004601(peroxidase activity);GO:0005576(extracellular region);GO:0006979(response to oxidative stress);GO:0020037(heme binding);GO:0042744(hydrogen peroxide catabolic process);GO:0046872(metal ion binding);GO:0055114(oxidation-reduction process)	00940(Phenylpropanoid biosynthesis)	K00430	EC:1.11.1.7	Peroxidase [Handroanthus impetiginosus]	NA	0.31368	0.421398	0.201581	0.796171	0.582836	0.620345	0.468481	-1.09394	0.0292516	0.101371	down	yes

## Sheet: Figure S1
Figure S1 Scheme figure of this study

[truncated: 4 more sheets: Figure S2, Figure S3, Figure S4, Figure S5]
